# Supplementary material for: Niche distribution and influence of environmental parameters in marine microbial communities: a systematic review
Source: PeerJ. 2015 Jun 16;3:e1008. doi: 10.7717/peerj.1008 (PMC4476133; doi:10.7717/peerj.1008)
Supplement: Table S4 — List of taxa that are over or under represented within the samples of a single laboratory. [file peerj-03-1008-s007.xlsx]

## Sheet: Sheet1
Laboratory	Taxon	Average abundance in samples of this laboratory	Average abundance in samples of other laboratories	P-value (Mann Whitney Test)	Q-value (FDR)	Group (Cfinder)
Thompson	Arthrospira	0.000551542	0.00102087	0.00030431	0.00203559	7
DeLong	Azotobacter	0.00229486	0.00150468	0.00409292	0.0203618	4
DeLong	Bermanella	0.00230635	0.00161405	0.000245196	0.00165884	4
DeLong	Cenarchaeum	0.00426255	0.00214007	0.000436091	0.00282204	8
DeLong	Chromohalobacter	0.00339524	0.00235251	0.00171678	0.00965689	4
Thompson	Isosphaera	0.000497326	0.000981241	0.00714338	0.032271	5
Dinsdale	Methanobrevibacter	0	0.000286623	0.00674876	0.0310276	No group
DeLong	Nitrococcus	0.00152319	0.00078655	0.000299027	0.0020059	4
DeLong	Nitrosopumilus	0.00656395	0.00381457	0.00113618	0.00670868	8
Karl	Salmonella	0.000921101	0.00173116	0.00772738	0.0341523	1
Thompson	Sphaerobacter	0.000726023	0.00120273	0.00402109	0.0200717	3
Thompson	Thermobaculum	0.000470776	0.000721248	0.00943876	0.040162	3
DeLong	unclassified..derived.from.Thaumarchaeota.	0.010942	0.00538093	7.19816887216406e-05	0.000535804	8
DeLong	unclassified..derived.from.Verrucomicrobia.subdivision.3.	0.0057024	0.00144811	0.00255177	0.0135335	5
