# Supplementary material for: Niche distribution and influence of environmental parameters in marine microbial communities: a systematic review
Source: PeerJ. 2015 Jun 16;3:e1008. doi: 10.7717/peerj.1008 (PMC4476133; doi:10.7717/peerj.1008)
Supplement: Table S5 — Comparisson between the global (180 metagenomes) and south Atlantic (71 metagenomes) networks based on ubiquity of taxa, Spearman R, p-value and q-value. [file peerj-03-1008-s008.xlsx]

## Sheet: Sheet1
		Global Network (180 Samples)						South Atlantic Network (71 Samples)
Taxon A	Taxon B	Ubiquity of Taxon A	Ubiquity of Taxon B	Signal of R	Module of R	P-value	Q-Value	Ubiquity of Taxon A	Ubiquity of Taxon B	Signal of R	Module of R	P-value	Q-Value
Acidimicrobium	Acidothermus	0.816667	0.811111	pos	0.674282	3.22162e-25	7.51579892288862e-25	0.746479	0.71831	pos	0.512376	4.929059e-06	0.000680559
Acinetobacter	Actinobacillus	0.983333	0.933333	pos	0.690052	8.758145e-27	2.51400969427711e-26	1	0.971831	pos	0.315797	0.00730195	0.12336
Actinobacillus	Aeromonas	0.933333	0.95	pos	0.600635	4.980804e-19	5.02829047881356e-19	0.971831	0.957746	pos	0.492844	1.263986e-05	0.00139083
Actinobacillus	Aggregatibacter	0.933333	0.905556	pos	0.615221	3.978278e-20	4.66621407261538e-20	0.971831	0.915493	pos	0.500897	8.632965e-06	0.0010471
Acidiphilium	Ahrensia	0.966667	0.933333	pos	0.667137	1.534551e-24	3.28266465319865e-24	0.943662	0.943662	pos	0.529163	2.091701e-06	0.000340282
Aeromonas	Alteromonas	0.95	0.977778	pos	0.660608	6.156739e-24	1.21729715082988e-23	0.957746	0.985915	pos	0.873939	2.616007e-23	4.54624645071429e-20
Acetohalobium	Aminobacterium	0.75	0.655556	pos	0.614467	4.548009e-20	5.29536050946854e-20	0.56338	0.394366	pos	0.30158	0.0105924	0.15445
Acinetobacter	Anaeromyxobacter	0.983333	0.95	pos	0.628584	3.489965e-21	4.73106208392603e-21	1	0.957746	neg	0.141017	0.240789	0.673023
Actinobacillus	Anaeromyxobacter	0.933333	0.95	pos	0.684746	3.021428e-26	8.03185741701534e-26	0.971831	0.957746	pos	0.0866904	0.47223	0.829529
Acaryochloris	Arthrospira	0.927778	0.911111	pos	0.635095	1.021291e-21	1.49506962058372e-21	0.915493	0.873239	pos	0.338149	0.00392406	0.0836662
Anabaena	Arthrospira	0.955556	0.911111	pos	0.615419	3.840517e-20	4.51574670080197e-20	0.971831	0.873239	pos	0.485671	1.761013e-05	0.00180529
Acidiphilium	Aurantimonas	0.966667	0.944444	pos	0.717084	1.028763e-29	4.41626639189189e-29	0.943662	0.943662	pos	0.276304	0.0196766	0.221271
Acinetobacter	Aurantimonas	0.983333	0.944444	neg	0.611394	7.818864e-20	8.74061864164223e-20	1	0.943662	neg	0.173556	0.147768	0.569722
Ahrensia	Aurantimonas	0.933333	0.944444	pos	0.673854	3.542242e-25	8.17374485714286e-25	0.943662	0.943662	pos	0.205735	0.0852051	0.46765
Asticcacaulis	Aurantimonas	0.911111	0.944444	pos	0.644985	1.491487e-22	2.47628416550523e-22	0.929577	0.943662	pos	0.0345828	0.774638	0.946558
Acinetobacter	Bacillus	0.983333	1	pos	0.70355	3.31643e-28	1.15348824452555e-27	1	1	neg	0.167706	0.161811	0.586832
Actinobacillus	Bacillus	0.933333	1	pos	0.65574	1.696037e-23	3.15996727468231e-23	0.971831	1	pos	0.113884	0.344325	0.754262
Anaeromyxobacter	Bacillus	0.95	1	pos	0.663183	3.574481e-24	7.3022087738478e-24	0.957746	1	pos	0.429156	0.000188175	0.0106739
Acinetobacter	Bacteroides	0.983333	1	pos	0.77725	1.167741e-37	1.01168833909091e-36	1	1	neg	0.0772636	0.521041	0.855705
Actinobacillus	Bacteroides	0.933333	1	pos	0.631371	2.069618e-21	2.90478049189985e-21	0.971831	1	neg	0.089538	0.457747	0.823024
Anaeromyxobacter	Bacteroides	0.95	1	pos	0.623345	9.188058e-21	1.17061755e-20	0.957746	1	pos	0.07901	0.512495	0.850394
Bacillus	Bacteroides	1	1	pos	0.787512	2.892405e-39	2.7427482238806e-38	1	1	pos	0.228303	0.0556849	0.381892
Bacteroides	Bartonella	1	0.944444	pos	0.624236	7.803346e-21	1.00537237256757e-20	1	0.915493	pos	0.0919787	0.44553	0.814433
Acidiphilium	Beijerinckia	0.966667	0.916667	pos	0.709122	8.131162e-29	3.08724995458167e-28	0.943662	0.887324	pos	0.239785	0.0440004	0.340026
Ahrensia	Beijerinckia	0.933333	0.916667	pos	0.675341	2.547098e-25	6.06088487890137e-25	0.943662	0.887324	pos	0.161689	0.177944	0.607119
Aurantimonas	Beijerinckia	0.944444	0.916667	pos	0.717006	1.050163e-29	4.48791631838565e-29	0.943662	0.887324	pos	0.257455	0.0301946	0.279127
Bacteroides	Beijerinckia	1	0.916667	neg	0.600541	5.060564e-19	5.10340475343915e-19	1	0.887324	pos	0.105473	0.381354	0.77929
Abiotrophia	Bradyrhizobium	0.538889	0.988889	neg	0.605389	2.2167e-19	2.32912359426681e-19	0.225352	1	neg	0.140128	0.243799	0.673283
Bacteroides	Bradyrhizobium	1	0.988889	pos	0.626546	5.097323e-21	6.77038162926829e-21	1	1	pos	0.1334	0.266742	0.692718
Agrobacterium	Brucella	0.994444	1	pos	0.612138	0	0	0.985915	1	pos	0.299698	0.011371	0.161016
Acidovorax	Burkholderia	0.95	1	pos	0.633548	1.371017e-21	1.97070769381599e-21	0.971831	1	pos	0.602453	2.721786e-08	9.70666906221498e-06
Acinetobacter	Burkholderia	0.983333	1	pos	0.772797	5.469384e-37	4.53245474086956e-36	1	1	pos	0.317874	0.00712717	0.121457
Actinobacillus	Burkholderia	0.933333	1	pos	0.696426	1.909103e-27	5.9651644557377e-27	0.971831	1	pos	0.362813	0.00187376	0.0518893
Aeromonas	Burkholderia	0.95	1	pos	0.613693	5.216169e-20	6.01089366021765e-20	0.957746	1	pos	0.349039	0.00285171	0.0679182
Agrobacterium	Burkholderia	0.994444	1	pos	0.631633	0	0	0.985915	1	pos	0.0574111	0.633665	0.901758
Anaeromyxobacter	Burkholderia	0.95	1	pos	0.680765	7.522481e-26	1.91939073440428e-25	0.957746	1	pos	0.487575	1.613779e-05	0.00168485
Bacillus	Burkholderia	1	1	pos	0.803029	0	0	1	1	pos	0.477599	3.179789e-05	0.00282734
Bacteroides	Burkholderia	1	1	pos	0.789942	1.16913e-39	1.13114811167513e-38	1	1	pos	0.135949	0.257649	0.687487
Bacillus	Campylobacter	1	0.966667	pos	0.689382	1.025667e-26	2.90478648142645e-26	1	0.957746	pos	0.15423	0.199071	0.630728
Bacteroides	Campylobacter	1	0.966667	pos	0.663203	3.559313e-24	7.28287917167382e-24	1	0.957746	pos	0.326771	0.00541338	0.102268
Burkholderia	Campylobacter	1	0.966667	pos	0.641929	2.723105e-22	4.34693310720268e-22	1	0.957746	neg	0.185385	0.121669	0.531377
Albidiferax	Candidatus.Accumulibacter	0.905556	0.894444	pos	0.607245	1.610125e-19	1.72993136978579e-19	0.901408	0.859155	pos	0.39278	0.000703677	0.0271246
Alicyclobacillus	Candidatus.Koribacter	0.8	0.872222	pos	0.649393	6.183219e-23	1.06173111837838e-22	0.647887	0.816901	pos	0.544239	9.305227e-07	0.000173755
Acidiphilium	Candidatus.Pelagibacter	0.966667	0.994444	pos	0.605919	2.023908e-19	2.14190374680733e-19	0.943662	0.985915	pos	0.30348	0.0100891	0.150021
Ahrensia	Candidatus.Pelagibacter	0.933333	0.994444	pos	0.657685	1.133918e-23	2.1504952318408e-23	0.943662	0.985915	pos	0.501098	8.550138e-06	0.00104072
Beijerinckia	Candidatus.Pelagibacter	0.916667	0.994444	pos	0.735232	7.005869e-32	3.76146093352113e-31	0.887324	0.985915	pos	0.509715	5.623095e-06	0.000752929
Bradyrhizobium	Candidatus.Pelagibacter	0.988889	0.994444	neg	0.612829	6.075418e-20	6.92635840191388e-20	1	0.985915	pos	0.120557	0.315846	0.73338
Buchnera	Candidatus.Pelagibacter	0.794444	0.994444	pos	0.620872	1.441994e-20	1.79636638169935e-20	0.676056	0.985915	pos	0.265169	0.0254263	0.254569
Candidatus.Liberibacter	Candidatus.Pelagibacter	0.794444	0.994444	pos	0.653314	2.791035e-23	4.99034963414634e-23	0.71831	0.985915	pos	0.443046	0.000109188	0.00714979
Candidatus.Odyssella	Candidatus.Pelagibacter	0.555556	0.994444	pos	0.600241	5.322902e-19	5.34533783561644e-19	0.295775	0.985915	pos	0.056803	0.637987	0.904275
Acidiphilium	Candidatus.Puniceispirillum	0.966667	0.988889	pos	0.681975	5.710283e-26	1.4648451410498e-25	0.943662	0.971831	pos	0.430061	0.000181744	0.0104052
Ahrensia	Candidatus.Puniceispirillum	0.933333	0.988889	pos	0.710103	6.326702e-29	2.45437437079108e-28	0.943662	0.971831	pos	0.432376	0.000166216	0.00971953
Aurantimonas	Candidatus.Puniceispirillum	0.944444	0.988889	pos	0.64102	3.252689e-22	5.10677531630972e-22	0.943662	0.971831	pos	0.344532	0.00325888	0.0742907
Beijerinckia	Candidatus.Puniceispirillum	0.916667	0.988889	pos	0.601734	4.135178e-19	4.21253301336184e-19	0.887324	0.971831	pos	0.340006	0.00371911	0.080941
Candidatus.Pelagibacter	Candidatus.Puniceispirillum	0.994444	0.988889	pos	0.605784	2.071113e-19	2.18821584146341e-19	0.985915	0.971831	pos	0.505554	6.894104e-06	0.000881091
Candidatus.Koribacter	Candidatus.Solibacter	0.872222	0.9	pos	0.657823	1.101776e-23	2.09579346906188e-23	0.816901	0.859155	pos	0.461723	5.056484e-05	0.00400103
Caldanaerobacter	Carboxydothermus	0.888889	0.85	pos	0.601442	4.345347e-19	4.41483549147122e-19	0.84507	0.788732	pos	0.312373	0.00799933	0.13026
Azotobacter	Cellvibrio	0.966667	0.95	pos	0.623506	8.922139e-21	1.13749812267559e-20	0.985915	0.971831	pos	0.665303	2.469078e-10	1.44302671617438e-07
Bermanella	Cellvibrio	0.933333	0.95	pos	0.636199	8.266807e-22	1.22428392711733e-21	0.957746	0.971831	pos	0.584889	8.500235e-08	2.4663822322659e-05
Acidiphilium	Chelativorans	0.966667	0.966667	pos	0.707393	1.262132e-28	4.63511289402697e-28	0.943662	0.985915	pos	0.131433	0.274586	0.700558
Ahrensia	Chelativorans	0.933333	0.966667	pos	0.663056	3.671636e-24	7.48463980320856e-24	0.943662	0.985915	pos	0.175015	0.14434	0.564046
Asticcacaulis	Chelativorans	0.911111	0.966667	pos	0.632569	1.650878e-21	2.34818915522388e-21	0.929577	0.985915	neg	0.0106322	0.929876	0.976129
Aurantimonas	Chelativorans	0.944444	0.966667	pos	0.794523	2.050835e-40	2.05731132105263e-39	0.943662	0.985915	pos	0.337805	0.00396312	0.084106
Beijerinckia	Chelativorans	0.916667	0.966667	pos	0.749639	9.867228e-34	6.28994534046823e-33	0.887324	0.985915	pos	0.431055	0.000174922	0.0101045
Buchnera	Chelativorans	0.794444	0.966667	pos	0.638888	4.923707e-22	7.50166709992006e-22	0.676056	0.985915	pos	0.161892	0.177391	0.606214
Candidatus.Pelagibacter	Chelativorans	0.994444	0.966667	pos	0.673478	3.84847e-25	8.82693600481348e-25	0.985915	0.985915	pos	0.306237	0.00964145	0.14615
Candidatus.Puniceispirillum	Chelativorans	0.988889	0.966667	pos	0.603699	2.960718e-19	3.05364096753247e-19	0.971831	0.985915	pos	0.153271	0.201915	0.634851
Algoriphagus	Chitinophaga	0.955556	0.972222	pos	0.709379	7.614353e-29	2.89679776806387e-28	0.971831	0.943662	pos	0.30728	0.00914401	0.141556
Anaeromyxobacter	Chlorobium	0.95	0.972222	pos	0.637247	6.759689e-22	1.01528504602049e-21	0.957746	1	pos	0.440491	0.000120901	0.00770239
Bacillus	Chlorobium	1	0.972222	pos	0.709879	6.699702e-29	2.584945751417e-28	1	1	pos	0.448457	0.0001039	0.00688869
Bacteroides	Chlorobium	1	0.972222	pos	0.673713	3.653858e-25	8.41093399516908e-25	1	1	pos	0.293897	0.013126	0.175064
Burkholderia	Chlorobium	1	0.972222	pos	0.698086	1.275538e-27	4.09288792592593e-27	1	1	pos	0.379276	0.00119471	0.0386754
Anaeromyxobacter	Chloroflexus	0.95	0.933333	pos	0.660598	6.169845e-24	1.21862430777202e-23	0.957746	0.957746	pos	0.616507	1.040146e-08	4.15116834058323e-06
Candidatus.Solibacter	Chloroherpeton	0.9	0.872222	pos	0.641583	2.91394e-22	4.62445432139883e-22	0.859155	0.830986	pos	0.479202	2.359931e-05	0.00225198
Carboxydothermus	Chloroherpeton	0.85	0.872222	pos	0.629625	2.873082e-21	3.95100598268398e-21	0.788732	0.830986	pos	0.376261	0.00122121	0.0392241
Albidiferax	Chromobacterium	0.905556	0.883333	pos	0.617527	2.635775e-20	3.16958179810726e-20	0.901408	0.830986	pos	0.373725	0.00132575	0.0414185
Azotobacter	Chromohalobacter	0.966667	0.966667	pos	0.659206	8.258723e-24	1.59808386172589e-23	0.985915	0.985915	pos	0.722502	0	0
Blastopirellula	Chthoniobacter	0.938889	0.916667	pos	0.654872	2.028268e-23	3.71005643761996e-23	0.915493	0.929577	pos	0.637635	2.233022e-09	1.07386126062958e-06
Candidatus.Solibacter	Chthoniobacter	0.9	0.916667	pos	0.605167	2.303029e-19	2.41185344725275e-19	0.859155	0.929577	pos	0.463261	4.73641e-05	0.00379902
Actinobacillus	Citrobacter	0.933333	0.911111	pos	0.629804	2.77831e-21	3.83728902898551e-21	0.971831	0.901408	pos	0.353539	0.00249112	0.0623407
Acinetobacter	Clostridium	0.983333	0.994444	pos	0.634799	1.080634e-21	1.57228122442748e-21	1	0.985915	neg	0.332763	0.0047634	0.0944318
Actinobacillus	Clostridium	0.933333	0.994444	pos	0.629055	3.196089e-21	4.36059100501074e-21	0.971831	0.985915	neg	0.0725358	0.547746	0.867524
Agrobacterium	Clostridium	0.994444	0.994444	pos	0.643427	0	0	0.985915	0.985915	pos	0.159591	0.183314	0.61428
Anaeromyxobacter	Clostridium	0.95	0.994444	pos	0.629682	2.842719e-21	3.92056614616498e-21	0.957746	0.985915	pos	0.443744	0.000106178	0.00699873
Bacillus	Clostridium	1	0.994444	pos	0.849783	0	0	1	0.985915	pos	0.516767	5.502725e-06	0.000739827
Bacteroides	Clostridium	1	0.994444	pos	0.749969	8.92018e-34	5.72453302356902e-33	1	0.985915	pos	0.262676	0.0271729	0.263629
Burkholderia	Clostridium	1	0.994444	pos	0.773962	0	0	1	0.985915	pos	0.120959	0.314224	0.731783
Campylobacter	Clostridium	0.966667	0.994444	pos	0.720933	3.690656e-30	1.66691714123223e-29	0.957746	0.985915	pos	0.328314	0.00518589	0.0998009
Chlorobium	Clostridium	0.972222	0.994444	pos	0.7288	4.300588e-31	2.16128211631579e-30	1	0.985915	pos	0.509826	7.617122e-06	0.000948463
Aeromonas	Colwellia	0.95	0.95	pos	0.628196	3.752045e-21	5.07191331205674e-21	0.957746	0.971831	pos	0.937263	2.697116e-33	5.30467805856287e-30
Alteromonas	Colwellia	0.977778	0.95	pos	0.733368	1.191853e-31	6.22375840547945e-31	0.985915	0.971831	pos	0.8877	6.148949e-25	1.10969947461264e-21
Chromobacterium	Comamonas	0.883333	0.916667	pos	0.601044	4.647609e-19	4.70437745831121e-19	0.830986	0.929577	pos	0.423186	0.000236086	0.0126664
Acetohalobium	Conexibacter	0.75	0.8	pos	0.609468	1.09475e-19	1.19988125359402e-19	0.56338	0.661972	pos	0.475406	2.79446e-05	0.00257535
Cellvibrio	Congregibacter	0.95	0.95	pos	0.652847	3.070361e-23	5.45905603171642e-23	0.971831	0.971831	pos	0.586106	7.871982e-08	2.36127109389041e-05
Acinetobacter	Corynebacterium	0.983333	0.961111	pos	0.735698	6.131681e-32	3.31631743286119e-31	1	1	neg	0.00902079	0.940438	0.980967
Anaeromyxobacter	Corynebacterium	0.95	0.961111	pos	0.641109	3.196846e-22	5.0356929553719e-22	0.957746	1	pos	0.279251	0.0183552	0.212695
Bacillus	Corynebacterium	1	0.961111	pos	0.715179	1.698007e-29	7.14042177092511e-29	1	1	pos	0.223474	0.0611774	0.399987
Bacteroides	Corynebacterium	1	0.961111	pos	0.664776	2.546692e-24	5.31071657768052e-24	1	1	pos	0.182227	0.128099	0.542615
Burkholderia	Corynebacterium	1	0.961111	pos	0.706211	1.701703e-28	6.15454633396584e-28	1	1	pos	0.277029	0.0196281	0.221018
Chlorobium	Corynebacterium	0.972222	0.961111	pos	0.622395	1.092905e-20	1.37860816015884e-20	1	1	pos	0.321026	0.00655449	0.115391
Clostridium	Corynebacterium	0.994444	0.961111	pos	0.659934	7.091121e-24	1.38338552978506e-23	0.985915	1	pos	0.222803	0.061974	0.402405
Algoriphagus	Croceibacter	0.955556	0.972222	pos	0.708922	8.55629e-29	3.23577157539683e-28	0.971831	0.971831	pos	0.307609	0.00906597	0.140866
Blattabacterium	Croceibacter	0.761111	0.972222	pos	0.644529	1.632266e-22	2.69592633968804e-22	0.605634	0.971831	pos	0.475351	2.801336e-05	0.00258024
Candidatus.Sulcia	Croceibacter	0.655556	0.972222	pos	0.644523	1.634266e-22	2.69689263722944e-22	0.394366	0.971831	pos	0.505985	6.751127e-06	0.000866527
Chryseobacterium	Croceibacter	0.894444	0.972222	pos	0.622103	1.152858e-20	1.45039428910891e-20	0.830986	0.971831	pos	0.587322	7.288815e-08	2.216710861875e-05
Anabaena	Cyanothece	0.955556	0.977778	pos	0.727882	5.548073e-31	2.73954070932642e-30	0.971831	0.985915	pos	0.632299	3.32985e-09	1.51279431892956e-06
Arthrospira	Cyanothece	0.911111	0.977778	pos	0.630648	2.371677e-21	3.30681518800293e-21	0.873239	0.985915	pos	0.497113	1.033916e-05	0.00120296
Crocosphaera	Cyanothece	0.905556	0.977778	pos	0.680104	8.740342e-26	2.20942862758621e-25	0.873239	0.985915	pos	0.559315	3.975252e-07	8.79845953948787e-05
Algoriphagus	Cytophaga	0.955556	0.944444	pos	0.714419	2.071318e-29	8.58246110434783e-29	0.971831	0.929577	pos	0.256836	0.0306077	0.281265
Blattabacterium	Cytophaga	0.761111	0.944444	pos	0.620646	1.50232e-20	1.86785513372472e-20	0.605634	0.929577	pos	0.269271	0.0231612	0.241643
Chitinophaga	Cytophaga	0.972222	0.944444	pos	0.68434	3.318203e-26	8.78402071944444e-26	0.943662	0.929577	pos	0.496453	1.06675e-05	0.00122983
Chryseobacterium	Cytophaga	0.894444	0.944444	pos	0.605571	2.148366e-19	2.26356307131012e-19	0.830986	0.929577	pos	0.46032	5.365865e-05	0.00417839
Croceibacter	Cytophaga	0.972222	0.944444	pos	0.720908	3.715509e-30	1.67417497730496e-29	0.971831	0.929577	pos	0.520514	3.271739e-06	0.000490022
Candidatus.Solibacter	Desulfatibacillum	0.9	0.894444	pos	0.642504	2.432726e-22	3.91600647932489e-22	0.859155	0.816901	pos	0.474641	2.890659e-05	0.00263956
Chloroherpeton	Desulfohalobium	0.872222	0.794444	pos	0.623691	8.623573e-21	1.10238297370892e-20	0.830986	0.661972	pos	0.493218	1.242086e-05	0.00137271
Anaeromyxobacter	Desulfovibrio	0.95	0.972222	pos	0.688751	1.189452e-26	3.33737236470588e-26	0.957746	0.985915	pos	0.542942	9.992063e-07	0.000184379
Bacillus	Desulfovibrio	1	0.972222	pos	0.654926	2.005457e-23	3.67538561730769e-23	1	0.985915	pos	0.464386	5.506357e-05	0.00424452
Burkholderia	Desulfovibrio	1	0.972222	pos	0.70123	5.8982e-28	1.96537923076923e-27	1	0.985915	pos	0.483534	2.467798e-05	0.00233524
Chlorobium	Desulfovibrio	0.972222	0.972222	pos	0.624573	7.335634e-21	9.49845000271739e-21	1	0.985915	pos	0.579879	2.105537e-07	5.34860135603248e-05
Chloroflexus	Desulfovibrio	0.933333	0.972222	pos	0.634051	1.246136e-21	1.80344359605163e-21	0.957746	0.985915	pos	0.488279	1.5623e-05	0.00164259
Clostridium	Desulfovibrio	0.994444	0.972222	pos	0.685248	2.690887e-26	7.20341379494382e-26	0.985915	0.985915	pos	0.504795	9.603229e-06	0.00113421
Corynebacterium	Desulfovibrio	0.961111	0.972222	pos	0.612514	6.42159e-20	7.27678391200951e-20	1	0.985915	pos	0.284373	0.0165185	0.200387
Actinobacillus	Dickeya	0.933333	0.944444	pos	0.678411	1.281189e-25	3.17135874545455e-25	0.971831	0.971831	pos	0.449496	8.412083e-05	0.0058787
Aeromonas	Dickeya	0.95	0.944444	pos	0.678756	1.185256e-25	2.9492140156658e-25	0.957746	0.971831	pos	0.69188	2.36626e-11	1.58933578235294e-08
Anaeromyxobacter	Dickeya	0.95	0.944444	pos	0.605101	2.328959e-19	2.43633142371021e-19	0.957746	0.971831	pos	0.254991	0.0318679	0.287447
Bacteroides	Dickeya	1	0.944444	pos	0.605135	2.315434e-19	2.42351301702361e-19	1	0.971831	neg	0.111822	0.35319	0.761631
Burkholderia	Dickeya	1	0.944444	pos	0.632535	1.661354e-21	2.35956834873323e-21	1	0.971831	pos	0.472975	3.11074e-05	0.00278555
Ahrensia	Dinoroseobacter	0.933333	0.977778	pos	0.700829	6.510653e-28	2.15439316284722e-27	0.943662	0.985915	pos	0.204796	0.086672	0.470524
Aurantimonas	Dinoroseobacter	0.944444	0.977778	pos	0.678908	1.145327e-25	2.85732102356021e-25	0.943662	0.985915	pos	0.169263	0.158208	0.581847
Candidatus.Puniceispirillum	Dinoroseobacter	0.988889	0.977778	pos	0.729844	3.214486e-31	1.6294708287234e-30	0.971831	0.985915	pos	0.445628	9.842772e-05	0.00659777
Citreicella	Dinoroseobacter	0.961111	0.977778	pos	0.724655	1.34711e-30	6.32411738916256e-30	0.957746	0.985915	pos	0.500654	8.734261e-06	0.0010551
Cytophaga	Dinoroseobacter	0.944444	0.977778	pos	0.611043	8.314292e-20	9.26185888486265e-20	0.929577	0.985915	pos	0.3135	0.0077636	0.127902
Algoriphagus	Dokdonia	0.955556	0.988889	pos	0.698002	1.301978e-27	4.16370816778523e-27	0.971831	0.985915	pos	0.375506	0.00125152	0.0398785
Blattabacterium	Dokdonia	0.761111	0.988889	pos	0.637033	7.043023e-22	1.05534605644654e-21	0.605634	0.985915	pos	0.376678	0.00120476	0.0388828
Chitinophaga	Dokdonia	0.972222	0.988889	pos	0.703293	3.536012e-28	1.22538888581818e-27	0.943662	0.985915	pos	0.492865	1.262766e-05	0.00139013
Chryseobacterium	Dokdonia	0.894444	0.988889	pos	0.681979	5.704372e-26	1.4648451410498e-25	0.830986	0.985915	pos	0.565778	2.725095e-07	6.43473097214234e-05
Croceibacter	Dokdonia	0.972222	0.988889	pos	0.890826	6.92199e-63	1.46592366e-61	0.971831	0.985915	pos	0.828243	5.066909e-19	8.11830046631707e-16
Cytophaga	Dokdonia	0.944444	0.988889	pos	0.726255	8.691262e-31	4.17268145390428e-30	0.929577	0.985915	pos	0.575817	1.491421e-07	4.00543486962388e-05
Algoriphagus	Dyadobacter	0.955556	0.955556	pos	0.791746	5.923537e-40	5.88034454270833e-39	0.971831	0.943662	pos	0.346335	0.0030902	0.0716903
Chitinophaga	Dyadobacter	0.972222	0.955556	pos	0.692488	4.915658e-27	1.4548515757764e-26	0.943662	0.943662	pos	0.39216	0.000718767	0.0275339
Chryseobacterium	Dyadobacter	0.894444	0.955556	pos	0.607186	1.626585e-19	1.74368448256468e-19	0.830986	0.943662	pos	0.523727	2.774778e-06	0.000430917
Croceibacter	Dyadobacter	0.972222	0.955556	pos	0.717072	1.03196e-29	4.42003541573034e-29	0.971831	0.943662	pos	0.525375	2.548251e-06	0.000402635
Cytophaga	Dyadobacter	0.944444	0.955556	pos	0.718979	6.223143e-30	2.72673805931034e-29	0.929577	0.943662	pos	0.41278	0.000347113	0.016581
Dokdonia	Dyadobacter	0.988889	0.955556	pos	0.71184	4.046535e-29	1.60681160625e-28	0.985915	0.943662	pos	0.571544	1.93246e-07	4.95106200702028e-05
Acinetobacter	Erythrobacter	0.983333	0.972222	pos	0.606137	1.949117e-19	2.06734390762382e-19	1	0.985915	neg	0.121563	0.311801	0.729341
Aeromonas	Erythrobacter	0.95	0.972222	pos	0.618702	2.134353e-20	2.59775020306513e-20	0.957746	0.985915	pos	0.322445	0.00609903	0.11027
Agrobacterium	Erythrobacter	0.994444	0.972222	pos	0.607255	1.607213e-19	1.72777663733785e-19	0.985915	0.985915	pos	0.187659	0.11697	0.525716
Bacillus	Erythrobacter	1	0.972222	pos	0.651872	3.744315e-23	6.6019097039778e-23	1	0.985915	pos	0.0838699	0.48595	0.838602
Bacteroides	Erythrobacter	1	0.972222	pos	0.614853	4.246967e-20	4.9599994497549e-20	1	0.985915	neg	0.103018	0.391747	0.784998
Burkholderia	Erythrobacter	1	0.972222	pos	0.724688	1.334932e-30	6.28242072098765e-30	1	0.985915	pos	0.32827	0.00538994	0.102002
Corynebacterium	Erythrobacter	0.961111	0.972222	pos	0.617821	2.500294e-20	3.0219152593532e-20	1	0.985915	neg	0.100637	0.40283	0.793191
Acinetobacter	Escherichia	0.983333	0.972222	pos	0.702152	4.69515e-28	1.59517930481283e-27	1	1	pos	0.391415	0.000805921	0.0297092
Actinobacillus	Escherichia	0.933333	0.972222	pos	0.703877	3.056202e-28	1.06492157440585e-27	0.971831	1	pos	0.455151	6.663511e-05	0.00491393
Aeromonas	Escherichia	0.95	0.972222	pos	0.637352	6.62446e-22	9.96544653512234e-22	0.957746	1	pos	0.676616	9.373285e-11	5.77617696937148e-08
Anaeromyxobacter	Escherichia	0.95	0.972222	pos	0.646848	1.029767e-22	1.73693442654867e-22	0.957746	1	pos	0.0732084	0.54403	0.864987
Bacillus	Escherichia	1	0.972222	pos	0.674019	3.414562e-25	7.89824656796117e-25	1	1	pos	0.156908	0.190861	0.620041
Bacteroides	Escherichia	1	0.972222	pos	0.690988	7.020971e-27	2.03993456189024e-26	1	1	neg	0.101777	0.3975	0.788798
Burkholderia	Escherichia	1	0.972222	pos	0.724637	1.353811e-30	6.33996011302211e-30	1	1	pos	0.393964	0.000740654	0.0280558
Citrobacter	Escherichia	0.911111	0.972222	pos	0.61043	9.256432e-20	1.0233619136891e-19	0.901408	1	pos	0.650842	8.027694e-10	4.2665634834466e-07
Clostridium	Escherichia	0.994444	0.972222	pos	0.620392	1.573007e-20	1.95065149121666e-20	0.985915	1	neg	0.157981	0.187816	0.618546
Corynebacterium	Escherichia	0.961111	0.972222	pos	0.629351	3.024474e-21	4.14126971551724e-21	1	1	neg	0.153689	0.200211	0.632577
Dickeya	Escherichia	0.944444	0.972222	pos	0.668264	1.203132e-24	2.620765248e-24	0.971831	1	pos	0.648916	9.348704e-10	4.90515746376997e-07
Erythrobacter	Escherichia	0.972222	0.972222	pos	0.609865	1.021678e-19	1.12302091580161e-19	0.985915	1	pos	0.22837	0.0556115	0.381654
Clostridium	Eubacterium	0.994444	0.966667	pos	0.640629	3.510452e-22	5.47090884055601e-22	0.985915	0.943662	pos	0.423661	0.000231902	0.0125093
Aliivibrio	Ferrimonas	0.938889	0.933333	pos	0.60083	4.818951e-19	4.8700533435843e-19	0.929577	0.943662	pos	0.626046	5.267548e-09	2.29516262260927e-06
Colwellia	Ferrimonas	0.95	0.933333	pos	0.70853	9.455271e-29	3.55458511360947e-28	0.971831	0.943662	pos	0.818981	2.632069e-18	4.07790671412736e-15
Caldanaerobacter	Fervidobacterium	0.888889	0.733333	pos	0.653576	2.645533e-23	4.75248435249764e-23	0.84507	0.549296	pos	0.330709	0.00484937	0.0955186
Bacteroides	Flavobacterium	1	0.988889	pos	0.601986	3.962276e-19	4.03855511016043e-19	1	0.985915	pos	0.581657	1.903423e-07	4.90344158011765e-05
Bacillus	Frankia	1	0.977778	pos	0.7137	2.498128e-29	1.01957857987152e-28	1	0.971831	pos	0.442391	0.000112086	0.00728583
Bacteroides	Frankia	1	0.977778	pos	0.663358	3.444065e-24	7.07369384698276e-24	1	0.971831	pos	0.170491	0.155167	0.58101
Burkholderia	Frankia	1	0.977778	pos	0.71378	2.446477e-29	1.00064059270386e-28	1	0.971831	pos	0.532298	1.77314e-06	0.000295933
Chlorobium	Frankia	0.972222	0.977778	pos	0.619851	1.734678e-20	2.13999758446602e-20	1	0.971831	pos	0.508388	6.002513e-06	0.000791154
Clostridium	Frankia	0.994444	0.977778	pos	0.688053	1.400932e-26	3.89238541107872e-26	0.985915	0.971831	pos	0.399718	0.000553435	0.0229689
Corynebacterium	Frankia	0.961111	0.977778	pos	0.612709	6.205435e-20	7.05701617541766e-20	1	0.971831	pos	0.417391	0.000293061	0.0146771
Eubacterium	Frankia	0.966667	0.977778	pos	0.631111	2.173853e-21	3.04659104264706e-21	0.943662	0.971831	pos	0.338252	0.00391242	0.0835539
Acidiphilium	Fulvimarina	0.966667	0.955556	pos	0.691051	6.915936e-27	2.01248458259542e-26	0.943662	0.943662	pos	0.377478	0.00117375	0.0382238
Ahrensia	Fulvimarina	0.933333	0.955556	pos	0.734092	9.701864e-32	5.13659799555556e-31	0.943662	0.943662	pos	0.375667	0.00124502	0.0397719
Asticcacaulis	Fulvimarina	0.911111	0.955556	pos	0.612022	7.002243e-20	7.89253409698403e-20	0.929577	0.943662	pos	0.155421	0.195583	0.626063
Aurantimonas	Fulvimarina	0.944444	0.955556	pos	0.75118	6.14822e-34	4.01318743835616e-33	0.943662	0.943662	pos	0.222505	0.0621758	0.40311
Beijerinckia	Fulvimarina	0.916667	0.955556	pos	0.68802	1.411841e-26	3.91698536535662e-26	0.887324	0.943662	pos	0.085505	0.478331	0.832963
Candidatus.Pelagibacter	Fulvimarina	0.994444	0.955556	pos	0.620899	1.43487e-20	1.78866070634402e-20	0.985915	0.943662	pos	0.26959	0.0229927	0.24068
Candidatus.Puniceispirillum	Fulvimarina	0.988889	0.955556	pos	0.715172	1.700814e-29	7.14042177092511e-29	0.971831	0.943662	pos	0.306945	0.00922418	0.142321
Chelativorans	Fulvimarina	0.966667	0.955556	pos	0.625683	5.978524e-21	7.84784211019284e-21	0.985915	0.943662	neg	0.117431	0.329408	0.743857
Dinoroseobacter	Fulvimarina	0.977778	0.955556	pos	0.693623	3.748714e-27	1.12534322141732e-26	0.985915	0.943662	pos	0.0647439	0.591667	0.887513
Bacillus	Fusobacterium	1	0.955556	pos	0.619594	1.817046e-20	2.23006418287186e-20	1	0.957746	pos	0.122808	0.307588	0.727239
Campylobacter	Fusobacterium	0.966667	0.955556	pos	0.60004	5.506786e-19	5.50967670131234e-19	0.957746	0.957746	pos	0.447649	9.069303e-05	0.00622143
Clostridium	Fusobacterium	0.994444	0.955556	pos	0.65926	8.166681e-24	1.58187947012195e-23	0.985915	0.957746	pos	0.289044	0.0144963	0.185675
Acinetobacter	Geobacillus	0.983333	0.95	pos	0.649633	5.891155e-23	1.01340626624549e-22	1	0.971831	neg	0.061922	0.607954	0.894352
Actinobacillus	Geobacillus	0.933333	0.95	pos	0.710184	6.196616e-29	2.41528631820041e-28	0.971831	0.971831	pos	0.0152836	0.899333	0.96972
Aeromonas	Geobacillus	0.95	0.95	pos	0.604811	2.447582e-19	2.55272206564551e-19	0.957746	0.971831	pos	0.221941	0.0628593	0.4055
Aggregatibacter	Geobacillus	0.905556	0.95	pos	0.625534	6.144731e-21	8.04938645085911e-21	0.915493	0.971831	pos	0.0506021	0.675157	0.918004
Anaeromyxobacter	Geobacillus	0.95	0.95	pos	0.708583	9.329286e-29	3.51415397549407e-28	0.957746	0.971831	pos	0.385982	0.000885943	0.0316315
Bacillus	Geobacillus	1	0.95	pos	0.730885	2.402102e-31	1.22417283743316e-30	1	0.971831	pos	0.495376	1.122352e-05	0.00127206
Bacteroides	Geobacillus	1	0.95	pos	0.687269	1.682613e-26	4.6344803150289e-26	1	0.971831	pos	0.150202	0.211201	0.642175
Burkholderia	Geobacillus	1	0.95	pos	0.760309	3.465702e-35	2.50213182272727e-34	1	0.971831	pos	0.355083	0.00237713	0.0604195
Chlorobium	Geobacillus	0.972222	0.95	pos	0.71443	2.065448e-29	8.57678406971678e-29	1	0.971831	pos	0.434058	0.000155704	0.00930188
Chloroflexus	Geobacillus	0.933333	0.95	pos	0.628742	3.388526e-21	4.60337174340699e-21	0.957746	0.971831	pos	0.545177	8.836222e-07	0.000165941
Clostridium	Geobacillus	0.994444	0.95	pos	0.764176	9.858925e-36	7.39807521653543e-35	0.985915	0.971831	pos	0.473529	3.035964e-05	0.00273574
Corynebacterium	Geobacillus	0.961111	0.95	pos	0.659154	8.349e-24	1.61227902735562e-23	1	0.971831	pos	0.139907	0.24455	0.673283
Desulfovibrio	Geobacillus	0.972222	0.95	pos	0.684499	3.199185e-26	8.49254402506964e-26	0.985915	0.971831	pos	0.3994	0.000559636	0.0231505
Dickeya	Geobacillus	0.944444	0.95	pos	0.635193	1.002266e-21	1.46947615076923e-21	0.971831	0.971831	pos	0.22917	0.0545531	0.378171
Erythrobacter	Geobacillus	0.972222	0.95	pos	0.604523	2.571489e-19	2.67244167611778e-19	0.985915	0.971831	pos	0.20084	0.0930684	0.483278
Escherichia	Geobacillus	0.972222	0.95	pos	0.727577	6.036117e-31	2.96516469123711e-30	1	0.971831	pos	0.148626	0.216086	0.647606
Frankia	Geobacillus	0.977778	0.95	pos	0.650363	5.084265e-23	8.82569133879781e-23	0.971831	0.971831	pos	0.419029	0.000275794	0.014053
Fusobacterium	Geobacillus	0.955556	0.95	pos	0.625831	5.817647e-21	7.64719667724138e-21	0.957746	0.971831	neg	0.0159128	0.895212	0.96972
Acinetobacter	Geobacter	0.983333	0.977778	pos	0.665086	2.383292e-24	4.99181818901099e-24	1	0.985915	neg	0.069383	0.564516	0.874676
Actinobacillus	Geobacter	0.933333	0.977778	pos	0.622893	9.980174e-21	1.26814744293333e-20	0.971831	0.985915	pos	0.0948029	0.431623	0.8086
Anaeromyxobacter	Geobacter	0.95	0.977778	pos	0.683324	4.192345e-26	1.09161332923497e-25	0.957746	0.985915	pos	0.496563	1.061227e-05	0.00122605
Bacillus	Geobacter	1	0.977778	pos	0.707302	1.291495e-28	4.73382590384615e-28	1	0.985915	pos	0.468477	4.655694e-05	0.00375629
Bacteroides	Geobacter	1	0.977778	pos	0.696906	1.699579e-27	5.35267914662274e-27	1	0.985915	pos	0.105131	0.382068	0.77929
Burkholderia	Geobacter	1	0.977778	pos	0.741945	9.958664e-33	5.87653671331269e-32	1	0.985915	pos	0.518813	4.993898e-06	0.000687168
Campylobacter	Geobacter	0.966667	0.977778	pos	0.656169	1.552352e-23	2.90361424141315e-23	0.957746	0.985915	pos	0.114457	0.341887	0.752171
Chlorobium	Geobacter	0.972222	0.977778	pos	0.612637	6.283916e-20	7.12925231904762e-20	1	0.985915	pos	0.527632	3.265836e-06	0.000489808
Clostridium	Geobacter	0.994444	0.977778	pos	0.744315	4.929966e-33	2.97358075822785e-32	0.985915	0.985915	pos	0.606975	4.150229e-08	1.38844618011202e-05
Corynebacterium	Geobacter	0.961111	0.977778	pos	0.619823	1.743458e-20	2.14842669036846e-20	1	0.985915	pos	0.201174	0.092522	0.482156
Desulfovibrio	Geobacter	0.972222	0.977778	pos	0.685282	2.669559e-26	7.15637054008439e-26	0.985915	0.985915	pos	0.609993	3.408476e-08	1.18218688973601e-05
Dickeya	Geobacter	0.944444	0.977778	pos	0.645479	1.352238e-22	2.25339848951049e-22	0.971831	0.985915	pos	0.139186	0.247014	0.675981
Escherichia	Geobacter	0.972222	0.977778	pos	0.619649	1.79915e-20	2.2097834871134e-20	1	0.985915	pos	0.059658	0.62042	0.899516
Eubacterium	Geobacter	0.966667	0.977778	pos	0.626429	5.208242e-21	6.90327486230876e-21	0.943662	0.985915	pos	0.279483	0.0182545	0.212007
Frankia	Geobacter	0.977778	0.977778	pos	0.689942	8.988122e-27	2.57227635615616e-26	0.971831	0.985915	pos	0.476329	2.682505e-05	0.00249457
Geobacillus	Geobacter	0.95	0.977778	pos	0.706062	1.766861e-28	6.37810050378788e-28	0.971831	0.985915	pos	0.501413	8.422114e-06	0.00102836
Acidiphilium	Gluconobacter	0.966667	0.911111	pos	0.641262	3.102311e-22	4.89487149503311e-22	0.943662	0.901408	pos	0.252051	0.033965	0.2974
Aurantimonas	Gluconobacter	0.944444	0.911111	pos	0.630245	2.558089e-21	3.55114175819374e-21	0.943662	0.901408	pos	0.137635	0.252373	0.682209
Beijerinckia	Gluconobacter	0.916667	0.911111	pos	0.669685	8.840456e-25	1.94796637410405e-24	0.887324	0.901408	pos	0.388048	0.000826485	0.0302398
Candidatus.Pelagibacter	Gluconobacter	0.994444	0.911111	pos	0.67752	1.565109e-25	3.84915839225806e-25	0.985915	0.901408	pos	0.50869	5.914229e-06	0.000782974
Candidatus.Puniceispirillum	Gluconobacter	0.988889	0.911111	pos	0.611694	7.418494e-20	8.32723767020024e-20	0.971831	0.901408	pos	0.361558	0.00194837	0.053129
Chelativorans	Gluconobacter	0.966667	0.911111	pos	0.644778	1.553828e-22	2.57306356907037e-22	0.985915	0.901408	pos	0.254412	0.0322719	0.289472
Acidiphilium	Granulibacter	0.966667	0.961111	pos	0.695954	2.140075e-27	6.63249260162602e-27	0.943662	0.971831	pos	0.263673	0.0262976	0.258963
Ahrensia	Granulibacter	0.933333	0.961111	pos	0.612745	6.165896e-20	7.01706587701493e-20	0.943662	0.971831	pos	0.25777	0.0299858	0.278142
Aurantimonas	Granulibacter	0.944444	0.961111	pos	0.694146	3.30779e-27	9.99151781299525e-27	0.943662	0.971831	pos	0.237254	0.0463499	0.348705
Beijerinckia	Granulibacter	0.916667	0.961111	pos	0.694309	3.18034e-27	9.62179053968254e-27	0.887324	0.971831	pos	0.1168	0.33203	0.743857
Buchnera	Granulibacter	0.794444	0.961111	pos	0.630221	2.569555e-21	3.56446275836972e-21	0.676056	0.971831	pos	0.128798	0.284405	0.708445
Candidatus.Pelagibacter	Granulibacter	0.994444	0.961111	pos	0.690768	7.396398e-27	2.14574346849315e-26	0.985915	0.971831	pos	0.34291	0.0034176	0.0766545
Candidatus.Puniceispirillum	Granulibacter	0.988889	0.961111	pos	0.65688	1.340001e-23	2.52126545508391e-23	0.971831	0.971831	pos	0.23763	0.0459944	0.34755
Chelativorans	Granulibacter	0.966667	0.961111	pos	0.784438	8.947578e-39	8.31906520390244e-38	0.985915	0.971831	pos	0.310432	0.00841985	0.134491
Fulvimarina	Granulibacter	0.955556	0.961111	pos	0.664884	2.488289e-24	5.20601408781559e-24	0.943662	0.971831	pos	0.199616	0.0951209	0.488089
Gluconobacter	Granulibacter	0.911111	0.961111	pos	0.606847	1.724602e-19	1.84254002914798e-19	0.901408	0.971831	pos	0.247754	0.0372369	0.312389
Bradyrhizobium	Granulicatella	0.988889	0.522222	neg	0.608206	1.363227e-19	1.47129709060023e-19	1	0.253521	neg	0.0447995	0.710658	0.929701
Acinetobacter	Haemophilus	0.983333	0.961111	pos	0.655434	1.806733e-23	3.34983764396887e-23	1	0.985915	pos	0.315526	0.00758187	0.126091
Actinobacillus	Haemophilus	0.933333	0.961111	pos	0.704024	2.94616e-28	1.03414013996317e-27	0.971831	0.985915	pos	0.464524	4.487564e-05	0.00365113
Bacillus	Haemophilus	1	0.961111	pos	0.636427	7.913389e-22	1.17651477644306e-21	1	0.985915	pos	0.0592891	0.622587	0.899516
Bacteroides	Haemophilus	1	0.961111	pos	0.637596	6.319738e-22	9.54470731220285e-22	1	0.985915	pos	0.0439638	0.715245	0.931721
Burkholderia	Haemophilus	1	0.961111	pos	0.699315	9.445894e-28	3.07758529299145e-27	1	0.985915	pos	0.370758	0.00156176	0.0459073
Escherichia	Haemophilus	0.972222	0.961111	pos	0.632814	1.575977e-21	2.25342247711928e-21	1	0.985915	pos	0.251073	0.0349515	0.30212
Alkalilimnicola	Hahella	0.955556	0.966667	pos	0.614384	4.615471e-20	5.36080909567337e-20	0.971831	0.985915	pos	0.594321	4.650626e-08	1.52447241799401e-05
Azotobacter	Hahella	0.966667	0.966667	pos	0.663532	3.318647e-24	6.83820668324324e-24	0.985915	0.985915	pos	0.67827	0	0
Bermanella	Hahella	0.933333	0.966667	pos	0.634939	1.052026e-21	1.53417104514155e-21	0.957746	0.985915	pos	0.530366	1.963547e-06	0.000322146
Cellvibrio	Hahella	0.95	0.966667	pos	0.64214	2.612581e-22	4.1810070411419e-22	0.971831	0.985915	pos	0.647278	1.063224e-09	5.52565251455696e-07
Chromohalobacter	Hahella	0.966667	0.966667	pos	0.635608	9.257399e-22	1.36146624182099e-21	0.985915	0.985915	pos	0.688833	0	0
Congregibacter	Hahella	0.95	0.966667	pos	0.642815	2.288577e-22	3.6935036088061e-22	0.971831	0.985915	pos	0.462613	4.868911e-05	0.00387783
Candidatus.Solibacter	Haliangium	0.9	0.938889	pos	0.616464	3.187737e-20	3.78320468368618e-20	0.859155	0.957746	pos	0.402868	0.000495404	0.0213318
Aciduliprofundum	Haloarcula	0.777778	0.716667	pos	0.622814	1.012537e-20	1.28402895675316e-20	0.619718	0.507042	pos	0.310418	0.00842303	0.134516
Aciduliprofundum	Halothermothrix	0.777778	0.85	pos	0.622544	1.063632e-20	1.34435185145889e-20	0.619718	0.732394	pos	0.40312	0.00049101	0.0211869
Chloroherpeton	Halothermothrix	0.872222	0.85	pos	0.605839	2.051677e-19	2.16888317359956e-19	0.830986	0.732394	pos	0.352361	0.0025814	0.0637979
Desulfatibacillum	Halothermothrix	0.894444	0.85	pos	0.642143	2.610926e-22	4.1810070411419e-22	0.816901	0.732394	pos	0.516008	4.110627e-06	0.000586005
Desulfococcus	Halothermothrix	0.85	0.85	pos	0.602816	3.441406e-19	3.52462108328855e-19	0.746479	0.732394	pos	0.291113	0.0137771	0.180213
Alkalilimnicola	Halothiobacillus	0.955556	0.877778	pos	0.616545	3.141775e-20	3.73098015576324e-20	0.971831	0.816901	pos	0.429922	0.000182717	0.0104482
Eubacterium	Helicobacter	0.966667	0.95	pos	0.60022	5.34215e-19	5.36184196945761e-19	0.943662	0.929577	pos	0.291589	0.0136162	0.17897
Ahrensia	Hirschia	0.933333	0.938889	pos	0.612252	6.724662e-20	7.59763234854772e-20	0.943662	0.929577	neg	0.107874	0.370548	0.772154
Asticcacaulis	Hirschia	0.911111	0.938889	pos	0.656622	1.413667e-23	2.65724783234714e-23	0.929577	0.929577	pos	0.348138	0.00292927	0.0691472
Aurantimonas	Hirschia	0.944444	0.938889	pos	0.629357	3.020846e-21	4.13951273472322e-21	0.943662	0.929577	neg	0.103967	0.388232	0.782099
Beijerinckia	Hirschia	0.916667	0.938889	pos	0.666471	1.771128e-24	3.75085552e-24	0.887324	0.929577	pos	0.120377	0.317335	0.734804
Chelativorans	Hirschia	0.966667	0.938889	pos	0.674772	2.890115e-25	6.81752375e-25	0.985915	0.929577	neg	0.00945833	0.937602	0.979722
Acidiphilium	Hoeflea	0.966667	0.944444	pos	0.610648	8.910253e-20	9.88529814784633e-20	0.943662	0.943662	pos	0.276321	0.0196689	0.221201
Ahrensia	Hoeflea	0.933333	0.944444	pos	0.706821	1.458719e-28	5.31609639388145e-28	0.943662	0.943662	pos	0.337221	0.00403019	0.0849935
Aurantimonas	Hoeflea	0.944444	0.944444	pos	0.675927	2.235057e-25	5.37881141666667e-25	0.943662	0.943662	pos	0.339099	0.00381795	0.0822851
Beijerinckia	Hoeflea	0.916667	0.944444	pos	0.618672	2.145857e-20	2.61008515762604e-20	0.887324	0.943662	pos	0.326255	0.00549153	0.103209
Candidatus.Puniceispirillum	Hoeflea	0.988889	0.944444	pos	0.738397	2.813796e-32	1.57275518357771e-31	0.971831	0.943662	pos	0.352221	0.00259231	0.0639855
Chelativorans	Hoeflea	0.966667	0.944444	pos	0.701735	5.20597e-28	1.75310579858657e-27	0.985915	0.943662	pos	0.351505	0.00264874	0.0649248
Dinoroseobacter	Hoeflea	0.977778	0.944444	pos	0.734643	8.291823e-32	4.41458509441341e-31	0.985915	0.943662	pos	0.399732	0.000553175	0.0229666
Fulvimarina	Hoeflea	0.955556	0.944444	pos	0.682785	4.744031e-26	1.23022082802721e-25	0.943662	0.943662	pos	0.0458075	0.704444	0.927704
Hirschia	Hoeflea	0.938889	0.944444	pos	0.627368	4.376546e-21	5.86617206469761e-21	0.929577	0.943662	pos	0.0144738	0.904642	0.96972
Hydrogenivirga	Hydrogenobaculum	0.755556	0.627778	pos	0.604988	2.374681e-19	2.48279867580911e-19	0.619718	0.422535	pos	0.356348	0.00228729	0.0589557
Hydrogenobacter	Hydrogenobaculum	0.683333	0.627778	pos	0.618103	2.376994e-20	2.87836757560356e-20	0.507042	0.422535	pos	0.415805	0.000310717	0.0153215
Asticcacaulis	Hyphomonas	0.911111	0.961111	pos	0.634376	1.171308e-21	1.69902058447489e-21	0.929577	0.971831	pos	0.503744	7.526963e-06	0.000940412
Hirschia	Hyphomonas	0.938889	0.961111	pos	0.722442	2.45764e-30	1.13420383535109e-29	0.929577	0.971831	pos	0.458531	5.785796e-05	0.00440615
Aeromonas	Idiomarina	0.95	0.977778	pos	0.695539	2.365668e-27	7.29605697087379e-27	0.957746	0.985915	pos	0.864617	2.608739e-22	4.34950948347716e-19
Alteromonas	Idiomarina	0.977778	0.977778	pos	0.75233	4.309745e-34	2.89238520070423e-33	0.985915	0.985915	pos	0.879175	0	0
Colwellia	Idiomarina	0.95	0.977778	pos	0.75417	2.430341e-34	1.65436783785714e-33	0.971831	0.985915	pos	0.861174	5.842735e-22	9.64359560012563e-19
Ferrimonas	Idiomarina	0.933333	0.977778	pos	0.650854	4.603987e-23	8.0212058702011e-23	0.943662	0.985915	pos	0.800352	5.536747e-17	7.97619401703947e-14
Aeromicrobium	Intrasporangium	0.711111	0.727778	pos	0.626953	4.726486e-21	6.30418636529041e-21	0.535211	0.478873	pos	0.534344	1.590473e-06	0.000269278
Catenulispora	Intrasporangium	0.844444	0.727778	pos	0.614023	4.920357e-20	5.6941107723133e-20	0.732394	0.478873	pos	0.408437	0.000406205	0.018614
Blastopirellula	Isosphaera	0.938889	0.866667	pos	0.619183	1.956936e-20	2.3894426752082e-20	0.915493	0.802817	pos	0.457491	6.043877e-05	0.00454995
Cellulomonas	Janibacter	0.711111	0.755556	pos	0.637628	6.281044e-22	9.49379053449643e-22	0.507042	0.619718	pos	0.492043	1.312179e-05	0.0014352
Ahrensia	Jannaschia	0.933333	0.972222	pos	0.74606	2.922474e-33	1.79107249003215e-32	0.943662	0.957746	pos	0.282478	0.0169966	0.203352
Aurantimonas	Jannaschia	0.944444	0.972222	pos	0.665908	1.998707e-24	4.2187547530454e-24	0.943662	0.957746	pos	0.164926	0.169301	0.598185
Candidatus.Puniceispirillum	Jannaschia	0.988889	0.972222	pos	0.758951	5.358625e-35	3.81102210820896e-34	0.971831	0.957746	pos	0.403991	0.000476104	0.0207261
Citreicella	Jannaschia	0.961111	0.972222	pos	0.696898	1.7027e-27	5.35267914662274e-27	0.957746	0.957746	pos	0.430311	0.000180011	0.0103258
Croceibacter	Jannaschia	0.972222	0.972222	pos	0.610822	8.643801e-20	9.60646338542274e-20	0.971831	0.957746	pos	0.464993	4.398456e-05	0.00359198
Cytophaga	Jannaschia	0.944444	0.972222	pos	0.60538	2.220234e-19	2.33155151735537e-19	0.929577	0.957746	pos	0.42101	0.000256164	0.0133933
Dinoroseobacter	Jannaschia	0.977778	0.972222	pos	0.858096	2.071257e-53	3.65538503888889e-52	0.985915	0.957746	pos	0.64137	1.680417e-09	8.43947042408257e-07
Fulvimarina	Jannaschia	0.955556	0.972222	pos	0.718039	7.989146e-30	3.47655531415525e-29	0.943662	0.957746	pos	0.176111	0.141805	0.563525
Gluconobacter	Jannaschia	0.911111	0.972222	pos	0.613458	5.437052e-20	6.25031430156815e-20	0.901408	0.957746	pos	0.216306	0.0700187	0.427345
Hoeflea	Jannaschia	0.944444	0.972222	pos	0.71715	1.010851e-29	4.35900906334842e-29	0.943662	0.957746	pos	0.371791	0.00141082	0.0430571
Hahella	Kangiella	0.966667	0.938889	pos	0.658154	1.028537e-23	1.97024273567839e-23	0.985915	0.943662	pos	0.490031	1.440814e-05	0.00154251
Ahrensia	Ketogulonicigenium	0.933333	0.927778	pos	0.735364	6.74647e-32	3.6324214180791e-31	0.943662	0.915493	pos	0.114522	0.341613	0.752171
Candidatus.Puniceispirillum	Ketogulonicigenium	0.988889	0.927778	pos	0.669484	9.234799e-25	2.03016457831603e-24	0.971831	0.915493	pos	0.270261	0.0226412	0.238767
Citreicella	Ketogulonicigenium	0.961111	0.927778	pos	0.650642	4.805484e-23	8.35766739781022e-23	0.957746	0.915493	pos	0.325257	0.00564522	0.105074
Dinoroseobacter	Ketogulonicigenium	0.977778	0.927778	pos	0.690432	8.007221e-27	2.31589730288316e-26	0.985915	0.915493	pos	0.173357	0.148239	0.57042
Fulvimarina	Ketogulonicigenium	0.955556	0.927778	pos	0.676321	2.047172e-25	4.95166222335025e-25	0.943662	0.915493	pos	0.122321	0.309522	0.727873
Hoeflea	Ketogulonicigenium	0.944444	0.927778	pos	0.675898	2.249587e-25	5.40014209319899e-25	0.943662	0.915493	pos	0.130977	0.27627	0.702526
Jannaschia	Ketogulonicigenium	0.972222	0.927778	pos	0.739362	2.124778e-32	1.21982736987952e-31	0.957746	0.915493	pos	0.283225	0.0166947	0.201553
Beutenbergia	Kineococcus	0.738889	0.783333	pos	0.62717	4.540258e-21	6.07279420912281e-21	0.605634	0.633803	pos	0.346792	0.00304866	0.0710528
Acinetobacter	Klebsiella	0.983333	0.916667	pos	0.621426	1.303928e-20	1.63183635456336e-20	1	0.943662	pos	0.374579	0.00128969	0.0406576
Actinobacillus	Klebsiella	0.933333	0.916667	pos	0.661582	5.015167e-24	1.00198200230608e-23	0.971831	0.943662	pos	0.566928	2.545785e-07	6.07685910010901e-05
Aeromonas	Klebsiella	0.95	0.916667	pos	0.609133	1.160551e-19	1.26690160710195e-19	0.957746	0.943662	pos	0.675918	9.96268e-11	6.11643375588785e-08
Burkholderia	Klebsiella	1	0.916667	pos	0.636147	8.349287e-22	1.23458037408844e-21	1	0.943662	pos	0.39009	0.000771289	0.0288174
Citrobacter	Klebsiella	0.911111	0.916667	pos	0.698389	1.184807e-27	3.8340274057725e-27	0.901408	0.943662	pos	0.719832	1.508055e-12	1.61344692190554e-09
Corynebacterium	Klebsiella	0.961111	0.916667	pos	0.603426	3.101683e-19	3.1921208412527e-19	1	0.943662	neg	0.00984321	0.935068	0.978581
Dickeya	Klebsiella	0.944444	0.916667	pos	0.698199	1.241092e-27	3.9890747925801e-27	0.971831	0.943662	pos	0.646689	1.113307e-09	5.74954796674528e-07
Escherichia	Klebsiella	0.972222	0.916667	pos	0.695562	2.352477e-27	7.27789573095624e-27	1	0.943662	pos	0.569515	2.182564e-07	5.50594515069124e-05
Haemophilus	Klebsiella	0.961111	0.916667	pos	0.606721	1.762505e-19	1.88092638857783e-19	0.985915	0.943662	pos	0.474537	2.903979e-05	0.00264805
Algoriphagus	Kordia	0.955556	0.966667	pos	0.727912	5.501268e-31	2.72348488519481e-30	0.971831	0.971831	pos	0.291932	0.0135014	0.17796
Blattabacterium	Kordia	0.761111	0.966667	pos	0.669979	8.291393e-25	1.83121611332561e-24	0.605634	0.971831	pos	0.476649	2.644628e-05	0.00246493
Chitinophaga	Kordia	0.972222	0.966667	pos	0.624196	7.860523e-21	1.01094175695007e-20	0.943662	0.971831	pos	0.477635	2.531093e-05	0.00238619
Chryseobacterium	Kordia	0.894444	0.966667	pos	0.644351	1.690882e-22	2.7854979187554e-22	0.830986	0.971831	pos	0.610794	1.546587e-08	5.90679340796512e-06
Croceibacter	Kordia	0.972222	0.966667	pos	0.921555	4.702445e-75	1.04219304302326e-73	0.971831	0.971831	pos	0.822893	1.327827e-18	2.0867531927512e-15
Cytophaga	Kordia	0.944444	0.966667	pos	0.740736	1.421436e-32	8.2348237568389e-32	0.929577	0.971831	pos	0.55013	6.707225e-07	0.000132952
Dokdonia	Kordia	0.988889	0.966667	pos	0.852957	3.861869e-52	6.18548093613445e-51	0.985915	0.971831	pos	0.773095	2.79612e-15	3.7639327647541e-12
Dyadobacter	Kordia	0.955556	0.966667	pos	0.773997	3.620755e-37	3.04015816299559e-36	0.943662	0.971831	pos	0.60351	2.535978e-08	9.1132894309628e-06
Alicyclobacillus	Ktedonobacter	0.8	0.861111	pos	0.602495	3.634372e-19	3.71825712936125e-19	0.647887	0.760563	pos	0.519257	3.488086e-06	0.000513527
Candidatus.Solibacter	Ktedonobacter	0.9	0.861111	pos	0.660289	6.582384e-24	1.29207249268795e-23	0.859155	0.760563	pos	0.328596	0.00514524	0.0993347
Chloroherpeton	Ktedonobacter	0.872222	0.861111	pos	0.675203	2.626148e-25	6.2411946234414e-25	0.830986	0.760563	pos	0.57942	1.195416e-07	3.30505355454546e-05
Haliangium	Ktedonobacter	0.938889	0.861111	pos	0.617201	2.79425e-20	3.34537719849246e-20	0.957746	0.760563	pos	0.470415	3.479585e-05	0.00301872
Herpetosiphon	Ktedonobacter	0.872222	0.861111	pos	0.637474	6.469731e-22	9.74806900079051e-22	0.802817	0.760563	pos	0.428241	0.000194888	0.0109897
Candidatus.Puniceispirillum	Labrenzia	0.988889	1	pos	0.605213	2.284548e-19	2.39513118151815e-19	0.971831	1	pos	0.539995	1.173539e-06	0.000210631
Actinobacillus	Lactobacillus	0.933333	0.944444	pos	0.65385	2.501012e-23	4.51413718939394e-23	0.971831	0.943662	pos	0.0507173	0.674459	0.917654
Anaeromyxobacter	Lactobacillus	0.95	0.944444	pos	0.631716	1.939439e-21	2.73212914560237e-21	0.957746	0.943662	pos	0.132041	0.272352	0.69837
Bacillus	Lactobacillus	1	0.944444	pos	0.624402	7.569944e-21	9.78190729762712e-21	1	0.943662	pos	0.210011	0.0787758	0.451393
Bacteroides	Lactobacillus	1	0.944444	pos	0.645965	1.227855e-22	2.05468975417032e-22	1	0.943662	pos	0.313641	0.00773447	0.127629
Campylobacter	Lactobacillus	0.966667	0.944444	pos	0.603516	3.054275e-19	3.14502871420854e-19	0.957746	0.943662	pos	0.321198	0.00631045	0.11267
Chlorobium	Lactobacillus	0.972222	0.944444	pos	0.641741	2.824905e-22	4.49438141068447e-22	1	0.943662	pos	0.195456	0.102363	0.50073
Clostridium	Lactobacillus	0.994444	0.944444	pos	0.647023	9.944267e-23	1.68029901613475e-22	0.985915	0.943662	pos	0.401442	0.000520953	0.0220642
Geobacillus	Lactobacillus	0.95	0.944444	pos	0.662468	4.158729e-24	8.41458330573249e-24	0.971831	0.943662	pos	0.21101	0.0773299	0.447456
Geobacter	Lactobacillus	0.977778	0.944444	pos	0.618195	2.337859e-20	2.83277765670693e-20	0.985915	0.943662	pos	0.0884715	0.463142	0.826678
Algoriphagus	Leadbetterella	0.955556	0.894444	pos	0.636653	7.576973e-22	1.12914077701329e-21	0.971831	0.816901	pos	0.28296	0.0168013	0.202156
Chitinophaga	Leadbetterella	0.972222	0.894444	pos	0.729166	3.884162e-31	1.96371691564987e-30	0.943662	0.816901	pos	0.57634	1.444551e-07	3.88909835004098e-05
Croceibacter	Leadbetterella	0.972222	0.894444	pos	0.607529	1.532819e-19	1.65059492316384e-19	0.971831	0.816901	pos	0.467479	3.952247e-05	0.00332685
Cytophaga	Leadbetterella	0.944444	0.894444	pos	0.653829	2.511701e-23	4.52914106527909e-23	0.929577	0.816901	pos	0.354328	0.0024323	0.061369
Dokdonia	Leadbetterella	0.988889	0.894444	pos	0.683679	3.86425e-26	1.01032379972565e-25	0.985915	0.816901	pos	0.566218	2.655249e-07	6.28788615930065e-05
Dyadobacter	Leadbetterella	0.955556	0.894444	pos	0.616971	2.911386e-20	3.47470364182843e-20	0.943662	0.816901	pos	0.426389	0.000209143	0.0115842
Kordia	Leadbetterella	0.966667	0.894444	pos	0.620079	1.664562e-20	2.0601656961039e-20	0.971831	0.816901	pos	0.567399	2.475644e-07	5.93964682264427e-05
Algoriphagus	Leeuwenhoekiella	0.955556	0.972222	pos	0.636916	7.203839e-22	1.07859521869599e-21	0.971831	0.971831	pos	0.447576	9.096161e-05	0.00623342
Blattabacterium	Leeuwenhoekiella	0.761111	0.972222	pos	0.691295	6.527311e-27	1.90521512496172e-26	0.605634	0.971831	pos	0.438835	0.000129098	0.00811536
Chitinophaga	Leeuwenhoekiella	0.972222	0.972222	pos	0.660915	5.772062e-24	1.14242473229491e-23	0.943662	0.971831	pos	0.644551	1.314903e-09	6.66491458125e-07
Chryseobacterium	Leeuwenhoekiella	0.894444	0.972222	pos	0.659671	7.492955e-24	1.45879185188968e-23	0.830986	0.971831	pos	0.560598	3.690692e-07	8.28023388565574e-05
Croceibacter	Leeuwenhoekiella	0.972222	0.972222	pos	0.857746	2.537934e-53	4.39754745818182e-52	0.971831	0.971831	pos	0.682666	5.485835e-11	3.47847477784749e-08
Cytophaga	Leeuwenhoekiella	0.944444	0.972222	pos	0.726851	7.375836e-31	3.58631209591837e-30	0.929577	0.971831	pos	0.56675	2.57291e-07	6.13714708823529e-05
Dokdonia	Leeuwenhoekiella	0.988889	0.972222	pos	0.879205	3.290595e-59	6.67220645744681e-58	0.985915	0.971831	pos	0.714275	2.675341e-12	2.74602852548437e-09
Dyadobacter	Leeuwenhoekiella	0.955556	0.972222	pos	0.706877	1.43842e-28	5.25216191570881e-28	0.943662	0.971831	pos	0.609723	1.664582e-08	6.31339816177829e-06
Kordia	Leeuwenhoekiella	0.966667	0.972222	pos	0.851848	7.15752e-52	1.13685276e-50	0.971831	0.971831	pos	0.689574	2.929016e-11	1.91101635964286e-08
Aeromicrobium	Leifsonia	0.711111	0.655556	pos	0.64179	2.797942e-22	4.45892763545151e-22	0.535211	0.422535	pos	0.492232	1.300667e-05	0.00142529
Beutenbergia	Leifsonia	0.738889	0.655556	pos	0.610364	9.364497e-20	1.03470905982609e-19	0.605634	0.422535	pos	0.409103	0.000396584	0.0183001
Kineococcus	Leifsonia	0.783333	0.655556	pos	0.617656	2.575634e-20	3.10509702972802e-20	0.633803	0.422535	pos	0.435377	0.000147894	0.00897234
Akkermansia	Lentisphaera	0.827778	0.911111	pos	0.640344	3.710822e-22	5.76432496495517e-22	0.704225	0.887324	pos	0.292689	0.0132503	0.176114
Blastopirellula	Lentisphaera	0.938889	0.911111	pos	0.620625	1.507812e-20	1.87346132464146e-20	0.915493	0.887324	pos	0.492451	1.287399e-05	0.00141422
Chthoniobacter	Lentisphaera	0.916667	0.911111	pos	0.671958	5.379135e-25	1.20761263957597e-24	0.929577	0.887324	pos	0.622525	6.789609e-09	2.83364806111182e-06
Dechloromonas	Leptothrix	0.927778	0.883333	pos	0.617286	2.751816e-20	3.29664443494657e-20	0.901408	0.84507	pos	0.417028	0.000297015	0.014842
Ahrensia	Loktanella	0.933333	0.933333	pos	0.739378	2.11524e-32	1.21802037462236e-31	0.943662	0.915493	pos	0.30855	0.00884587	0.138765
Aurantimonas	Loktanella	0.944444	0.933333	pos	0.674107	3.349277e-25	7.77554441169306e-25	0.943662	0.915493	pos	0.274466	0.0205408	0.226499
Candidatus.Puniceispirillum	Loktanella	0.988889	0.933333	pos	0.778415	7.751103e-38	6.80811166728111e-37	0.971831	0.915493	pos	0.624845	5.746033e-09	2.46707616864706e-06
Citreicella	Loktanella	0.961111	0.933333	pos	0.717922	8.240523e-30	3.57777604510251e-29	0.957746	0.915493	pos	0.319823	0.00655095	0.115368
Croceibacter	Loktanella	0.972222	0.933333	pos	0.654834	2.043862e-23	3.73499613806328e-23	0.971831	0.915493	pos	0.614664	1.183153e-08	4.64292136935484e-06
Cytophaga	Loktanella	0.944444	0.933333	pos	0.620131	1.64916e-20	2.04242947368421e-20	0.929577	0.915493	pos	0.44338	0.000107738	0.00707883
Dinoroseobacter	Loktanella	0.977778	0.933333	pos	0.849613	2.442247e-51	3.8470436214876e-50	0.985915	0.915493	pos	0.554724	5.173575e-07	0.000110272
Fulvimarina	Loktanella	0.955556	0.933333	pos	0.650286	5.163949e-23	8.95585695541401e-23	0.943662	0.915493	pos	0.0756825	0.530467	0.856442
Hoeflea	Loktanella	0.944444	0.933333	pos	0.701747	5.189994e-28	1.75081921486726e-27	0.943662	0.915493	pos	0.37723	0.00118329	0.038418
Jannaschia	Loktanella	0.972222	0.933333	pos	0.881749	5.566726e-60	1.15328040826087e-58	0.957746	0.915493	pos	0.605731	2.183819e-08	7.97871267680756e-06
Ketogulonicigenium	Loktanella	0.927778	0.933333	pos	0.726441	8.256615e-31	3.97401721969697e-30	0.915493	0.915493	pos	0.269667	0.0229521	0.240493
Anabaena	Lyngbya	0.955556	0.877778	pos	0.606155	1.943202e-19	2.06221771269488e-19	0.971831	0.830986	pos	0.453036	7.273767e-05	0.00524502
Arthrospira	Lyngbya	0.911111	0.877778	pos	0.630699	2.349042e-21	3.27765303953148e-21	0.873239	0.830986	pos	0.557953	4.30035e-07	9.42219667624917e-05
Cyanothece	Lyngbya	0.977778	0.877778	pos	0.670832	6.883356e-25	1.53103442147024e-24	0.985915	0.830986	pos	0.562786	3.248839e-07	7.43621891111498e-05
Algoriphagus	Maribacter	0.955556	0.955556	pos	0.721369	3.282629e-30	1.49324364534606e-29	0.971831	0.971831	pos	0.255261	0.0316807	0.286555
Blattabacterium	Maribacter	0.761111	0.955556	pos	0.673092	4.190666e-25	9.5429025041816e-25	0.605634	0.971831	pos	0.383058	0.000976735	0.0337769
Candidatus.Sulcia	Maribacter	0.655556	0.955556	pos	0.63041	2.479643e-21	3.44978069927007e-21	0.394366	0.971831	pos	0.412415	0.000351761	0.0167373
Chitinophaga	Maribacter	0.972222	0.955556	pos	0.649985	5.48809e-23	9.48349912964642e-23	0.943662	0.971831	pos	0.586883	7.494293e-08	2.26348725474265e-05
Chryseobacterium	Maribacter	0.894444	0.955556	pos	0.647183	9.633038e-23	1.63350270711744e-22	0.830986	0.971831	pos	0.552168	5.980241e-07	0.000120533
Croceibacter	Maribacter	0.972222	0.955556	pos	0.898865	1.106845e-65	2.39732564772727e-64	0.971831	0.971831	pos	0.748512	6.19418e-14	7.5632319401487e-11
Cytophaga	Maribacter	0.944444	0.955556	pos	0.810025	4.019869e-43	4.70053393496933e-42	0.929577	0.971831	pos	0.575403	1.529607e-07	4.09126276209283e-05
Dinoroseobacter	Maribacter	0.977778	0.955556	pos	0.611663	7.458221e-20	8.36690360565038e-20	0.985915	0.971831	pos	0.452787	7.348974e-05	0.0052888
Dokdonia	Maribacter	0.988889	0.955556	pos	0.855197	1.094166e-52	1.82936876842105e-51	0.985915	0.971831	pos	0.706445	5.866939e-12	5.22229119036585e-09
Dyadobacter	Maribacter	0.955556	0.955556	pos	0.747813	1.721136e-33	1.07556892327869e-32	0.943662	0.971831	pos	0.604214	2.418885e-08	8.73071288653846e-06
Kordia	Maribacter	0.966667	0.955556	pos	0.918078	1.907103e-73	4.17809002068965e-72	0.971831	0.971831	pos	0.82021	2.126655e-18	3.31047615177725e-15
Leadbetterella	Maribacter	0.894444	0.955556	pos	0.659649	7.52841e-24	1.4641989244898e-23	0.816901	0.971831	pos	0.564372	2.960418e-07	6.86213192794637e-05
Leeuwenhoekiella	Maribacter	0.972222	0.955556	pos	0.87742	1.118399e-58	2.22048801458333e-57	0.971831	0.971831	pos	0.691066	2.551881e-11	1.68987514890121e-08
Loktanella	Maribacter	0.933333	0.955556	pos	0.624929	6.869602e-21	8.9314197899045e-21	0.915493	0.971831	pos	0.52624	2.436433e-06	0.00038791
Acidiphilium	Maricaulis	0.966667	0.972222	pos	0.666835	1.637916e-24	3.48812055418994e-24	0.943662	0.971831	pos	0.177188	0.139345	0.558843
Acinetobacter	Maricaulis	0.983333	0.972222	neg	0.611625	7.508101e-20	8.41790618e-20	1	0.971831	neg	0.206709	0.0837062	0.463794
Ahrensia	Maricaulis	0.933333	0.972222	pos	0.760772	2.985356e-35	2.17178951755725e-34	0.943662	0.971831	pos	0.26846	0.0235948	0.244096
Aurantimonas	Maricaulis	0.944444	0.972222	pos	0.670029	8.201713e-25	1.81351101832947e-24	0.943662	0.971831	neg	0.0254551	0.83311	0.960889
Beijerinckia	Maricaulis	0.916667	0.972222	pos	0.696289	1.97371e-27	6.14688114379085e-27	0.887324	0.971831	pos	0.164143	0.171362	0.6005
Candidatus.Pelagibacter	Maricaulis	0.994444	0.972222	pos	0.629479	2.952926e-21	4.05203524550036e-21	0.985915	0.971831	pos	0.109424	0.363672	0.76614
Candidatus.Puniceispirillum	Maricaulis	0.988889	0.972222	pos	0.606411	1.859342e-19	1.97983567150838e-19	0.971831	0.971831	pos	0.0752108	0.533039	0.8583
Chelativorans	Maricaulis	0.966667	0.972222	pos	0.730449	2.71442e-31	1.37964920533333e-30	0.985915	0.971831	pos	0.106507	0.37668	0.777228
Dinoroseobacter	Maricaulis	0.977778	0.972222	pos	0.641812	2.786332e-22	4.44414124853556e-22	0.985915	0.971831	pos	0.122469	0.308933	0.727258
Fulvimarina	Maricaulis	0.955556	0.972222	pos	0.693533	3.830856e-27	1.14624984866562e-26	0.943662	0.971831	pos	0.069599	0.564114	0.874353
Gluconobacter	Maricaulis	0.911111	0.972222	pos	0.620485	1.546557e-20	1.91910002734375e-20	0.901408	0.971831	pos	0.203585	0.0885921	0.472979
Granulibacter	Maricaulis	0.961111	0.972222	pos	0.685353	2.626418e-26	7.05063761690141e-26	0.971831	0.971831	pos	0.183714	0.125126	0.537339
Hirschia	Maricaulis	0.938889	0.972222	pos	0.740978	1.323881e-32	7.71656631804281e-32	0.929577	0.971831	pos	0.506259	6.661291e-06	0.000860037
Hoeflea	Maricaulis	0.944444	0.972222	pos	0.661135	5.510788e-24	1.09640521169102e-23	0.943662	0.971831	pos	0.174253	0.146122	0.56699
Hyphomonas	Maricaulis	0.961111	0.972222	pos	0.75026	8.157996e-34	5.27089504271186e-33	0.971831	0.971831	pos	0.617708	9.559256e-09	3.85723025734644e-06
Jannaschia	Maricaulis	0.972222	0.972222	pos	0.696847	1.724313e-27	5.40549437171053e-27	0.957746	0.971831	pos	0.0119556	0.921174	0.973295
Ketogulonicigenium	Maricaulis	0.927778	0.972222	pos	0.654514	2.18296e-23	3.98536567049808e-23	0.915493	0.971831	pos	0.231198	0.0523915	0.370237
Loktanella	Maricaulis	0.933333	0.972222	pos	0.640607	3.525403e-22	5.48972068464052e-22	0.915493	0.971831	neg	0.121138	0.31426	0.731797
Acidovorax	Marinobacter	0.95	0.983333	pos	0.620715	1.483492e-20	1.84685548791639e-20	0.971831	0.985915	pos	0.481761	2.103291e-05	0.00206667
Acinetobacter	Marinobacter	0.983333	0.983333	pos	0.742538	8.358125e-33	4.99391418495298e-32	1	0.985915	pos	0.401274	0.000579266	0.0237201
Actinobacillus	Marinobacter	0.933333	0.983333	pos	0.741951	9.940898e-33	5.87653671331269e-32	0.971831	0.985915	pos	0.460634	5.295109e-05	0.00413702
Aeromonas	Marinobacter	0.95	0.983333	pos	0.719893	4.876058e-30	2.17313569719626e-29	0.957746	0.985915	pos	0.644891	1.280725e-09	6.53199580551242e-07
Alteromonas	Marinobacter	0.977778	0.983333	pos	0.65158	3.973276e-23	6.98622145387454e-23	0.985915	0.985915	pos	0.624849	1.171985e-08	4.61563948651079e-06
Anaeromyxobacter	Marinobacter	0.95	0.983333	pos	0.636694	7.517672e-22	1.12118019029734e-21	0.957746	0.985915	pos	0.26567	0.0251402	0.252907
Bacillus	Marinobacter	1	0.983333	pos	0.695062	2.65399e-27	8.14574064412238e-27	1	0.985915	pos	0.00600268	0.960382	0.985916
Bacteroides	Marinobacter	1	0.983333	pos	0.75609	1.329969e-34	9.21789423272727e-34	1	0.985915	neg	0.152616	0.2034	0.636082
Burkholderia	Marinobacter	1	0.983333	pos	0.804514	3.931994e-42	4.35719800232558e-41	1	0.985915	pos	0.467773	4.792809e-05	0.00383209
Campylobacter	Marinobacter	0.966667	0.983333	pos	0.605641	2.12273e-19	2.24150879778393e-19	0.957746	0.985915	neg	0.261276	0.027746	0.266596
Citrobacter	Marinobacter	0.911111	0.983333	pos	0.61547	3.80559e-20	4.48020663372452e-20	0.901408	0.985915	pos	0.456787	6.224375e-05	0.00465807
Clostridium	Marinobacter	0.994444	0.983333	pos	0.663621	3.25711e-24	6.7332447505423e-24	0.985915	0.985915	neg	0.171127	0.153332	0.578216
Corynebacterium	Marinobacter	0.961111	0.983333	pos	0.608229	1.357933e-19	1.46641376657224e-19	1	0.985915	neg	0.0495305	0.681019	0.921273
Dickeya	Marinobacter	0.944444	0.983333	pos	0.695556	2.355961e-27	7.27789573095624e-27	0.971831	0.985915	pos	0.587027	7.426399e-08	2.24607539921271e-05
Erythrobacter	Marinobacter	0.972222	0.983333	pos	0.746547	2.524224e-33	1.55701325048544e-32	0.985915	0.985915	pos	0.548122	1.168842e-06	0.000209903
Escherichia	Marinobacter	0.972222	0.983333	pos	0.67721	1.67776e-25	4.09975712820513e-25	1	0.985915	pos	0.518343	5.106601e-06	0.000699745
Frankia	Marinobacter	0.977778	0.983333	pos	0.632479	1.679054e-21	2.38293144005957e-21	0.971831	0.985915	pos	0.0910973	0.44992	0.817821
Geobacillus	Marinobacter	0.95	0.983333	pos	0.737325	3.838399e-32	2.12674084127907e-31	0.971831	0.985915	pos	0.243513	0.0407197	0.3269
Geobacter	Marinobacter	0.977778	0.983333	pos	0.702794	4.002943e-28	1.37718580469314e-27	0.985915	0.985915	pos	0.204896	0.0865513	0.470524
Haemophilus	Marinobacter	0.961111	0.983333	pos	0.685789	2.373655e-26	6.42640117897727e-26	0.985915	0.985915	pos	0.322334	0.00632908	0.112844
Idiomarina	Marinobacter	0.977778	0.983333	pos	0.742506	8.439364e-33	5.01103669283489e-32	0.985915	0.985915	pos	0.735178	0	0
Klebsiella	Marinobacter	0.916667	0.983333	pos	0.603896	2.862796e-19	2.95905052928417e-19	0.943662	0.985915	pos	0.511394	5.175249e-06	0.000707087
Lactobacillus	Marinobacter	0.944444	0.983333	pos	0.617545	2.627187e-20	3.16124900378788e-20	0.943662	0.985915	neg	0.180548	0.131878	0.546058
Bermanella	Marinomonas	0.933333	0.972222	pos	0.606385	1.867795e-19	1.98661678013393e-19	0.957746	0.985915	pos	0.556189	4.758374e-07	0.000102891
Colwellia	Marinomonas	0.95	0.972222	pos	0.636156	8.335488e-22	1.23349690434783e-21	0.971831	0.985915	pos	0.654331	6.075191e-10	3.30368685414735e-07
Ferrimonas	Marinomonas	0.933333	0.972222	pos	0.626259	5.375208e-21	7.11468503333333e-21	0.943662	0.985915	pos	0.621615	7.246155e-09	3.01270359560127e-06
Hahella	Marinomonas	0.966667	0.972222	pos	0.605468	2.186889e-19	2.30160708669243e-19	0.985915	0.985915	pos	0.645808	7.45699e-10	3.98416769517073e-07
Idiomarina	Marinomonas	0.977778	0.972222	pos	0.668919	1.044045e-24	2.28993069044879e-24	0.985915	0.985915	pos	0.632093	6.22637e-09	2.63881594625806e-06
Ahrensia	Maritimibacter	0.933333	0.972222	pos	0.69338	3.973899e-27	1.18718675454545e-26	0.943662	0.957746	pos	0.102963	0.392852	0.785905
Aurantimonas	Maritimibacter	0.944444	0.972222	pos	0.641055	3.230492e-22	5.07610696784831e-22	0.943662	0.957746	pos	0.234836	0.0486889	0.356617
Candidatus.Puniceispirillum	Maritimibacter	0.988889	0.972222	pos	0.734338	9.044466e-32	4.80188083454039e-31	0.971831	0.957746	pos	0.250547	0.0350817	0.302649
Chelativorans	Maritimibacter	0.966667	0.972222	pos	0.610059	9.876677e-20	1.08751856510687e-19	0.985915	0.957746	pos	0.211644	0.076425	0.445168
Citreicella	Maritimibacter	0.961111	0.972222	pos	0.74732	1.998534e-33	1.2407836495114e-32	0.957746	0.957746	pos	0.548528	7.33653e-07	0.000142925
Dinoroseobacter	Maritimibacter	0.977778	0.972222	pos	0.829459	6.849871e-47	9.52982052992701e-46	0.985915	0.957746	pos	0.547738	7.666692e-07	0.00014778
Fulvimarina	Maritimibacter	0.955556	0.972222	pos	0.65525	1.876411e-23	3.47227122912621e-23	0.943662	0.957746	neg	0.0413865	0.731835	0.935766
Hoeflea	Maritimibacter	0.944444	0.972222	pos	0.708374	9.837475e-29	3.6837381827112e-28	0.943662	0.957746	pos	0.51007	5.525569e-06	0.000742594
Jannaschia	Maritimibacter	0.972222	0.972222	pos	0.868621	3.554332e-56	6.774556792e-55	0.957746	0.957746	pos	0.449695	8.344075e-05	0.00584236
Ketogulonicigenium	Maritimibacter	0.927778	0.972222	pos	0.776521	1.507381e-37	1.29417485855856e-36	0.915493	0.957746	pos	0.412207	0.000354427	0.0168314
Loktanella	Maritimibacter	0.933333	0.972222	pos	0.82589	3.652733e-46	4.83479798472222e-45	0.915493	0.957746	pos	0.417893	0.000287667	0.0144961
Maricaulis	Maritimibacter	0.972222	0.972222	pos	0.665363	2.245996e-24	4.71461274889868e-24	0.971831	0.957746	pos	0.128191	0.2867	0.708889
Algoriphagus	Marivirga	0.955556	0.938889	pos	0.72086	3.763142e-30	1.69163883301887e-29	0.971831	0.901408	pos	0.394337	0.000667067	0.0261707
Chitinophaga	Marivirga	0.972222	0.938889	pos	0.715898	1.405702e-29	5.94072729933481e-29	0.943662	0.901408	pos	0.354119	0.00244772	0.0616114
Chryseobacterium	Marivirga	0.894444	0.938889	pos	0.661115	5.534145e-24	1.09990410531804e-23	0.830986	0.901408	pos	0.47223	3.214125e-05	0.00284861
Croceibacter	Marivirga	0.972222	0.938889	pos	0.704201	2.818603e-28	9.93023533826248e-28	0.971831	0.901408	pos	0.473801	2.999716e-05	0.00271201
Cytophaga	Marivirga	0.944444	0.938889	pos	0.674403	3.136285e-25	7.34368453316953e-25	0.929577	0.901408	pos	0.365894	0.00170145	0.0486336
Dokdonia	Marivirga	0.988889	0.938889	pos	0.738417	2.797194e-32	1.56807404823529e-31	0.985915	0.901408	pos	0.47883	2.399525e-05	0.00228115
Dyadobacter	Marivirga	0.955556	0.938889	pos	0.682321	5.275366e-26	1.36244547371274e-25	0.943662	0.901408	pos	0.377523	0.00117203	0.0381828
Kordia	Marivirga	0.966667	0.938889	pos	0.703897	3.04128e-28	1.06166294505494e-27	0.971831	0.901408	pos	0.485829	1.748299e-05	0.00179505
Leadbetterella	Marivirga	0.894444	0.938889	pos	0.678763	1.183358e-25	2.94834032418301e-25	0.816901	0.901408	pos	0.347974	0.00294365	0.0693942
Leeuwenhoekiella	Marivirga	0.972222	0.938889	pos	0.641471	2.978101e-22	4.71842103574397e-22	0.971831	0.901408	pos	0.433792	0.000157323	0.00933577
Maribacter	Marivirga	0.955556	0.938889	pos	0.700253	7.502758e-28	2.47409286297578e-27	0.971831	0.901408	pos	0.54211	1.045776e-06	0.000191466
Methanobrevibacter	Methanococcoides	0.772222	0.766667	pos	0.648152	7.935437e-23	1.35164816103664e-22	0.647887	0.605634	pos	0.424222	0.000227044	0.012312
Aciduliprofundum	Methanocorpusculum	0.777778	0.616667	pos	0.606835	1.728251e-19	1.84540414901961e-19	0.619718	0.338028	pos	0.499533	9.215279e-06	0.00109667
Methanococcoides	Methanoculleus	0.766667	0.7	pos	0.674699	2.937251e-25	6.92014883312732e-25	0.605634	0.521127	pos	0.54232	1.033863e-06	0.000189814
Methanocorpusculum	Methanohalobium	0.616667	0.622222	pos	0.617613	2.595425e-20	3.12500319014529e-20	0.338028	0.408451	pos	0.323398	0.0059419	0.108454
Aciduliprofundum	Methanohalophilus	0.777778	0.677778	pos	0.639695	4.210327e-22	6.47690335916061e-22	0.619718	0.478873	pos	0.404861	0.000461609	0.0202833
Aciduliprofundum	Methanoregula	0.777778	0.722222	pos	0.70214	4.708337e-28	1.59681322455516e-27	0.619718	0.507042	pos	0.517117	3.887121e-06	0.00056096
Chloroherpeton	Methanoregula	0.872222	0.722222	pos	0.609758	1.040917e-19	1.14350881959654e-19	0.830986	0.507042	pos	0.407062	0.000426745	0.0191537
Methanococcoides	Methanoregula	0.766667	0.722222	pos	0.643091	2.167764e-22	3.50743479117148e-22	0.605634	0.507042	pos	0.443198	0.000108525	0.00711458
Methanocorpusculum	Methanoregula	0.616667	0.722222	pos	0.607193	1.624546e-19	1.74247871468768e-19	0.338028	0.507042	pos	0.476868	2.619002e-05	0.0024459
Methanohalophilus	Methanoregula	0.677778	0.722222	pos	0.697009	1.657723e-27	5.23115900331126e-27	0.478873	0.507042	pos	0.448889	8.622922e-05	0.00598403
Aciduliprofundum	Methanosaeta	0.777778	0.738889	pos	0.655988	1.611303e-23	3.0050327964775e-23	0.619718	0.605634	pos	0.342343	0.00347474	0.0774011
Methanococcoides	Methanosaeta	0.766667	0.738889	pos	0.673515	3.81724e-25	8.77432840963856e-25	0.605634	0.605634	pos	0.560185	3.78017e-07	8.45211529850238e-05
Methanohalophilus	Methanosaeta	0.677778	0.738889	pos	0.628077	3.836008e-21	5.18173724167257e-21	0.478873	0.605634	pos	0.456448	6.313057e-05	0.0047137
Methanoregula	Methanosaeta	0.722222	0.738889	pos	0.682919	4.600405e-26	1.19460108038147e-25	0.507042	0.605634	pos	0.522918	2.892784e-06	0.000445035
Aciduliprofundum	Methanothermobacter	0.777778	0.744444	pos	0.670229	7.851806e-25	1.74017932976744e-24	0.619718	0.56338	pos	0.447622	9.07935e-05	0.0062258
Methanoregula	Methanothermobacter	0.722222	0.744444	pos	0.696683	1.794043e-27	5.61485378981938e-27	0.507042	0.56338	pos	0.480301	2.246328e-05	0.00217069
Methanosaeta	Methanothermobacter	0.738889	0.744444	pos	0.667587	1.392669e-24	3.00614622197056e-24	0.605634	0.56338	pos	0.485693	1.759184e-05	0.00180397
Chloroherpeton	Methylacidiphilum	0.872222	0.772222	pos	0.604068	2.779812e-19	2.87639613029316e-19	0.830986	0.605634	pos	0.437077	0.000138358	0.00853899
Albidiferax	Methylibium	0.905556	0.911111	pos	0.658232	1.012051e-23	1.9406128832998e-23	0.901408	0.887324	pos	0.352006	0.00260911	0.0642363
Comamonas	Methylibium	0.916667	0.911111	pos	0.680672	7.682129e-26	1.95489157196262e-25	0.929577	0.887324	pos	0.403336	0.000487272	0.0210893
Acinetobacter	Methylobacterium	0.983333	1	pos	0.623881	8.3294e-21	1.06692448924731e-20	1	1	neg	0.272435	0.0218186	0.234317
Agrobacterium	Methylobacterium	0.994444	1	pos	0.644536	0	0	0.985915	1	pos	0.358551	0.00226617	0.0585953
Anaeromyxobacter	Methylobacterium	0.95	1	pos	0.627289	4.441508e-21	5.94906131271961e-21	0.957746	1	pos	0.321238	0.00630354	0.11264
Bacillus	Methylobacterium	1	1	pos	0.664377	0	0	1	1	pos	0.0827968	0.491563	0.840599
Bacteroides	Methylobacterium	1	1	pos	0.611186	8.109525e-20	9.04962216042155e-20	1	1	neg	0.0292086	0.808561	0.953442
Burkholderia	Methylobacterium	1	1	pos	0.776808	0	0	1	1	pos	0.208719	0.0807419	0.456048
Chlorobium	Methylobacterium	0.972222	1	pos	0.626596	5.050308e-21	6.7126130041841e-21	1	1	pos	0.203018	0.0895241	0.475242
Clostridium	Methylobacterium	0.994444	1	pos	0.670006	0	0	0.985915	1	pos	0.160697	0.180265	0.609831
Erythrobacter	Methylobacterium	0.972222	1	pos	0.615198	3.994213e-20	4.68202335670357e-20	0.985915	1	pos	0.25493	0.0321813	0.289022
Geobacillus	Methylobacterium	0.95	1	pos	0.666788	1.654436e-24	3.5193694375e-24	0.971831	1	pos	0.122872	0.307334	0.727239
Geobacter	Methylobacterium	0.977778	1	pos	0.646989	1.001219e-22	1.69027760318866e-22	0.985915	1	pos	0.254762	0.0322978	0.289561
Marinobacter	Methylobacterium	0.983333	1	pos	0.647974	8.222856e-23	1.39935388714286e-22	0.985915	1	neg	0.0321932	0.78942	0.951523
Acidiphilium	Methylocella	0.966667	0.95	pos	0.691601	6.070467e-27	1.77458743895706e-26	0.943662	0.915493	pos	0.155047	0.196676	0.627388
Acinetobacter	Methylocella	0.983333	0.95	neg	0.600466	5.124453e-19	5.15964470047544e-19	1	0.915493	neg	0.191941	0.10881	0.510363
Ahrensia	Methylocella	0.933333	0.95	pos	0.602907	3.388449e-19	3.47411715653577e-19	0.943662	0.915493	pos	0.150283	0.210953	0.64172
Aurantimonas	Methylocella	0.944444	0.95	pos	0.72848	4.699715e-31	2.33881378328982e-30	0.943662	0.915493	pos	0.343188	0.00338996	0.0762481
Bacteroides	Methylocella	1	0.95	neg	0.611988	7.044528e-20	7.93081533845245e-20	1	0.915493	pos	0.0230114	0.848932	0.96372
Beijerinckia	Methylocella	0.916667	0.95	pos	0.766014	5.377767e-36	4.13307415403226e-35	0.887324	0.915493	pos	0.384866	0.000919658	0.0324665
Candidatus.Pelagibacter	Methylocella	0.994444	0.95	pos	0.725855	9.699049e-31	4.64482095326633e-30	0.985915	0.915493	pos	0.469974	3.547062e-05	0.0030635
Candidatus.Puniceispirillum	Methylocella	0.988889	0.95	pos	0.616211	3.335197e-20	3.95083000745805e-20	0.971831	0.915493	pos	0.372606	0.00137439	0.0424312
Chelativorans	Methylocella	0.966667	0.95	pos	0.736111	5.445279e-32	2.99098033832853e-31	0.985915	0.915493	pos	0.143251	0.233344	0.664622
Fulvimarina	Methylocella	0.955556	0.95	pos	0.713333	2.747936e-29	1.11675181577825e-28	0.943662	0.915493	pos	0.20416	0.0876763	0.470524
Gluconobacter	Methylocella	0.911111	0.95	pos	0.661393	5.218546e-24	1.04152342157068e-23	0.901408	0.915493	pos	0.296856	0.0119403	0.165556
Granulibacter	Methylocella	0.961111	0.95	pos	0.731906	1.802383e-31	9.2847081027027e-31	0.971831	0.915493	pos	0.219927	0.0653465	0.412892
Hoeflea	Methylocella	0.944444	0.95	pos	0.61156	7.594262e-20	8.50950227630805e-20	0.943662	0.915493	pos	0.120183	0.31812	0.735574
Jannaschia	Methylocella	0.972222	0.95	pos	0.67372	3.648803e-25	8.40945407255139e-25	0.957746	0.915493	pos	0.164625	0.170091	0.599275
Maricaulis	Methylocella	0.972222	0.95	pos	0.707799	1.138581e-28	4.22205328015564e-28	0.971831	0.915493	pos	0.0729764	0.54531	0.865883
Aurantimonas	Methylosinus	0.944444	0.861111	pos	0.646032	1.211632e-22	2.03110870008795e-22	0.943662	0.816901	pos	0.218678	0.0669291	0.417876
Beijerinckia	Methylosinus	0.916667	0.861111	pos	0.614298	4.686396e-20	5.43656164090079e-20	0.887324	0.816901	pos	0.279387	0.0182964	0.212289
Candidatus.Puniceispirillum	Methylosinus	0.988889	0.861111	pos	0.637999	5.846589e-22	8.86523359904534e-22	0.971831	0.816901	pos	0.40234	0.000504737	0.0215813
Chelativorans	Methylosinus	0.966667	0.861111	pos	0.667886	1.305578e-24	2.82776325909091e-24	0.985915	0.816901	pos	0.277844	0.0189761	0.216646
Fulvimarina	Methylosinus	0.955556	0.861111	pos	0.676702	1.880136e-25	4.58253096675192e-25	0.943662	0.816901	pos	0.31573	0.00731519	0.123476
Hirschia	Methylosinus	0.938889	0.861111	pos	0.639262	4.579e-22	6.99885645549318e-22	0.929577	0.816901	pos	0.123705	0.304038	0.725849
Hoeflea	Methylosinus	0.944444	0.861111	pos	0.62471	7.152907e-21	9.27444948435374e-21	0.943662	0.816901	pos	0.107817	0.370805	0.772399
Algoriphagus	Mucilaginibacter	0.955556	0.916667	pos	0.672069	5.248521e-25	1.18246820638298e-24	0.971831	0.887324	pos	0.320794	0.00638033	0.113352
Chitinophaga	Mucilaginibacter	0.972222	0.916667	pos	0.600426	5.159345e-19	5.18929370448549e-19	0.943662	0.887324	pos	0.468302	3.81409e-05	0.00323793
Croceibacter	Mucilaginibacter	0.972222	0.916667	pos	0.696404	1.919408e-27	5.98754770540098e-27	0.971831	0.887324	pos	0.600445	3.111092e-08	1.08939629302772e-05
Cytophaga	Mucilaginibacter	0.944444	0.916667	pos	0.612744	6.166624e-20	7.01706587701493e-20	0.929577	0.887324	pos	0.391639	0.000731661	0.0278403
Dokdonia	Mucilaginibacter	0.988889	0.916667	pos	0.644338	1.695321e-22	2.78799122174288e-22	0.985915	0.887324	pos	0.556999	4.542663e-07	9.88119454082781e-05
Dyadobacter	Mucilaginibacter	0.955556	0.916667	pos	0.635009	1.038154e-21	1.51510070750383e-21	0.943662	0.887324	pos	0.430009	0.000182113	0.0104209
Kordia	Mucilaginibacter	0.966667	0.916667	pos	0.673511	3.82093e-25	8.77432840963856e-25	0.971831	0.887324	pos	0.507093	6.395468e-06	0.000833581
Leadbetterella	Mucilaginibacter	0.894444	0.916667	pos	0.61141	7.797645e-20	8.72201371478873e-20	0.816901	0.887324	pos	0.457302	6.091761e-05	0.00457655
Maribacter	Mucilaginibacter	0.955556	0.916667	pos	0.651654	3.914533e-23	6.88928891782087e-23	0.971831	0.887324	pos	0.497496	1.015339e-05	0.00118723
Marivirga	Mucilaginibacter	0.938889	0.916667	pos	0.622545	1.063529e-20	1.34435185145889e-20	0.901408	0.887324	pos	0.364412	0.00178249	0.0501642
Acinetobacter	Mycobacterium	0.983333	0.988889	pos	0.619312	1.912057e-20	2.33914033504493e-20	1	0.985915	pos	0.0494299	0.681633	0.921681
Bacillus	Mycobacterium	1	0.988889	pos	0.70094	6.336081e-28	2.1002731106087e-27	1	0.985915	pos	0.448994	0.000101749	0.00678031
Bacteroides	Mycobacterium	1	0.988889	pos	0.663011	3.707267e-24	7.54114290501601e-24	1	0.985915	pos	0.15892	0.18518	0.61662
Burkholderia	Mycobacterium	1	0.988889	pos	0.717262	9.813295e-30	4.24130164852608e-29	1	0.985915	pos	0.601677	5.804582e-08	1.84563792914811e-05
Chlorobium	Mycobacterium	0.972222	0.988889	pos	0.643697	1.923973e-22	3.14501932933105e-22	1	0.985915	pos	0.427867	0.000226384	0.0122904
Clostridium	Mycobacterium	0.994444	0.988889	pos	0.671032	6.588145e-25	1.47209898827667e-24	0.985915	0.985915	pos	0.289303	0.0146783	0.186943
Corynebacterium	Mycobacterium	0.961111	0.988889	pos	0.621112	1.380306e-20	1.72402571166448e-20	1	0.985915	pos	0.417505	0.000329305	0.016005
Frankia	Mycobacterium	0.977778	0.988889	pos	0.713801	2.433496e-29	9.97471693763441e-29	0.971831	0.985915	pos	0.531896	1.811315e-06	0.000301386
Geobacillus	Mycobacterium	0.95	0.988889	pos	0.612931	5.967532e-20	6.81901438369305e-20	0.971831	0.985915	pos	0.234542	0.0489798	0.357807
Geobacter	Mycobacterium	0.977778	0.988889	pos	0.631755	1.925203e-21	2.71608950259067e-21	0.985915	0.985915	pos	0.459289	6.768298e-05	0.00496959
Marinobacter	Mycobacterium	0.983333	0.988889	pos	0.66305	3.676661e-24	7.48687592521367e-24	0.985915	0.985915	pos	0.098994	0.410584	0.795183
Methylobacterium	Mycobacterium	1	0.988889	pos	0.626214	5.419894e-21	7.16885354892436e-21	1	0.985915	pos	0.278203	0.0190997	0.217383
Haliangium	Myxococcus	0.938889	0.911111	pos	0.606987	1.6835e-19	1.80064590347924e-19	0.957746	0.887324	pos	0.536781	1.395969e-06	0.000241832
Lentisphaera	Myxococcus	0.911111	0.911111	pos	0.62249	1.074166e-20	1.35586781192053e-20	0.887324	0.887324	pos	0.587229	7.331998e-08	2.22572218400185e-05
Leifsonia	Nakamurella	0.655556	0.794444	pos	0.627451	4.309229e-21	5.78000737086559e-21	0.422535	0.676056	pos	0.524487	2.66812e-06	0.000418109
Acinetobacter	Neisseria	0.983333	0.95	pos	0.660439	6.378843e-24	1.25449599237113e-23	1	0.929577	pos	0.255811	0.0313025	0.284647
Bacillus	Neisseria	1	0.95	pos	0.617835	2.494027e-20	3.01625346573604e-20	1	0.929577	pos	0.148013	0.218009	0.649991
Bacteroides	Neisseria	1	0.95	pos	0.663665	3.226746e-24	6.67771756351792e-24	1	0.929577	pos	0.146202	0.223757	0.654304
Burkholderia	Neisseria	1	0.95	pos	0.64492	1.510861e-22	2.50408788347826e-22	1	0.929577	pos	0.448767	8.665936e-05	0.00600627
Clostridium	Neisseria	0.994444	0.95	pos	0.617617	2.593544e-20	3.1247123034134e-20	0.985915	0.929577	pos	0.131176	0.275534	0.701662
Geobacter	Neisseria	0.977778	0.95	pos	0.657069	1.288455e-23	2.43148042574257e-23	0.985915	0.929577	pos	0.172531	0.150213	0.573561
Marinobacter	Neisseria	0.983333	0.95	pos	0.660513	6.280371e-24	1.23788905129266e-23	0.985915	0.929577	pos	0.202918	0.0896637	0.475612
Methylobacterium	Neisseria	1	0.95	pos	0.612828	6.076008e-20	6.92635840191388e-20	1	0.929577	pos	0.0713735	0.554196	0.871521
Candidatus.Pelagibacter	Neorickettsia	0.994444	0.705556	pos	0.725043	1.211597e-30	5.73028258560794e-30	0.985915	0.549296	pos	0.508421	5.992743e-06	0.000790501
Gluconobacter	Neorickettsia	0.911111	0.705556	pos	0.60111	4.59633e-19	4.65741891547049e-19	0.901408	0.549296	pos	0.431838	0.000169709	0.00986699
Cellvibrio	Neptuniibacter	0.95	0.944444	pos	0.719317	5.686612e-30	2.50315992424942e-29	0.971831	0.943662	pos	0.64677	1.106292e-09	5.72231714740157e-07
Hahella	Neptuniibacter	0.966667	0.944444	pos	0.629744	2.809938e-21	3.87816207675597e-21	0.985915	0.943662	pos	0.587474	7.218912e-08	2.20361314215613e-05
Kangiella	Neptuniibacter	0.938889	0.944444	pos	0.639965	3.994603e-22	6.16495005506073e-22	0.943662	0.943662	pos	0.391741	0.000729133	0.027791
Candidatus.Pelagibacter	Nitrobacter	0.994444	0.994444	pos	0.626141	0	0	0.985915	0.985915	pos	0.466801	4.988344e-05	0.00395664
Hahella	Nitrococcus	0.966667	0.883333	pos	0.6242	7.855218e-21	1.01094162781904e-20	0.985915	0.887324	pos	0.410652	0.000375015	0.0175593
Acidovorax	Nitrosococcus	0.95	0.966667	pos	0.626176	5.457956e-21	7.21419149514563e-21	0.971831	1	pos	0.544388	9.229421e-07	0.000172526
Acinetobacter	Nitrosococcus	0.983333	0.966667	pos	0.703928	3.017945e-28	1.05545012293578e-27	1	1	pos	0.284842	0.0163351	0.199104
Anaeromyxobacter	Nitrosococcus	0.95	0.966667	pos	0.614141	4.818323e-20	5.58281072218845e-20	0.957746	1	pos	0.361716	0.00193884	0.0529361
Bacillus	Nitrosococcus	1	0.966667	pos	0.689348	1.033979e-26	2.92398215727003e-26	1	1	pos	0.227934	0.0560897	0.383158
Bacteroides	Nitrosococcus	1	0.966667	pos	0.703967	2.988275e-28	1.04699488051471e-27	1	1	pos	0.173843	0.146838	0.568138
Burkholderia	Nitrosococcus	1	0.966667	pos	0.738743	2.544784e-32	1.44355901904762e-31	1	1	pos	0.541784	1.616169e-06	0.000273065
Chlorobium	Nitrosococcus	0.972222	0.966667	pos	0.655534	1.769821e-23	3.28779612670565e-23	1	1	pos	0.478471	3.064386e-05	0.00275229
Clostridium	Nitrosococcus	0.994444	0.966667	pos	0.646419	1.121694e-22	1.88531637037037e-22	0.985915	1	pos	0.0692488	0.565271	0.875068
Corynebacterium	Nitrosococcus	0.961111	0.966667	pos	0.64071	3.455306e-22	5.3982075704918e-22	1	1	pos	0.284138	0.0166109	0.201036
Escherichia	Nitrosococcus	0.972222	0.966667	pos	0.624293	7.722164e-21	9.9635518105548e-21	1	1	pos	0.133434	0.266621	0.692621
Frankia	Nitrosococcus	0.977778	0.966667	pos	0.607476	1.546932e-19	1.66391218510158e-19	0.971831	1	pos	0.343782	0.00333144	0.0753807
Geobacillus	Nitrosococcus	0.95	0.966667	pos	0.651956	3.681405e-23	6.50724474698795e-23	0.971831	1	pos	0.175672	0.142815	0.564046
Geobacter	Nitrosococcus	0.977778	0.966667	pos	0.648522	7.367663e-23	1.25831233673835e-22	0.985915	1	pos	0.279577	0.0184964	0.21354
Klebsiella	Nitrosococcus	0.916667	0.966667	pos	0.612989	5.90688e-20	6.75375721655669e-20	0.943662	1	pos	0.276683	0.0195021	0.220221
Marinobacter	Nitrosococcus	0.983333	0.966667	pos	0.7015	5.517682e-28	1.85153202323944e-27	0.985915	1	pos	0.373206	0.00144702	0.0438089
Methylobacterium	Nitrosococcus	1	0.966667	pos	0.651176	4.313121e-23	7.54202626238532e-23	1	1	pos	0.0286385	0.81223	0.954326
Mycobacterium	Nitrosococcus	0.988889	0.966667	pos	0.692207	5.255717e-27	1.55308474449612e-26	0.985915	1	pos	0.456841	7.465437e-05	0.00535618
Neisseria	Nitrosococcus	0.95	0.966667	pos	0.647795	8.523145e-23	1.44916274487065e-22	0.929577	1	pos	0.24709	0.0377651	0.314746
Cenarchaeum	Nitrosopumilus	0.744444	0.861111	pos	0.819982	5.373712e-45	6.73835202105263e-44	0.619718	0.816901	pos	0.809665	1.2589e-17	1.8967522912844e-14
Citreicella	Oceanibulbus	0.961111	0.944444	pos	0.614328	4.661714e-20	5.41122221924482e-20	0.957746	0.915493	pos	0.327589	0.00529181	0.101106
Dinoroseobacter	Oceanibulbus	0.977778	0.944444	pos	0.689976	8.917248e-27	2.55583078015038e-26	0.985915	0.915493	pos	0.429335	0.00018689	0.0106221
Jannaschia	Oceanibulbus	0.972222	0.944444	pos	0.712634	3.294843e-29	1.32488834556962e-28	0.957746	0.915493	pos	0.488154	1.571326e-05	0.00164891
Loktanella	Oceanibulbus	0.933333	0.944444	pos	0.714324	2.123344e-29	8.77894504121475e-29	0.915493	0.915493	pos	0.537438	1.347494e-06	0.000236049
Maritimibacter	Oceanibulbus	0.972222	0.944444	pos	0.736632	4.687797e-32	2.58235291387283e-31	0.957746	0.915493	pos	0.388155	0.000823495	0.0301708
Hirschia	Oceanicaulis	0.938889	0.938889	pos	0.661695	4.897157e-24	9.80460214495798e-24	0.929577	0.957746	pos	0.356812	0.00225507	0.0584279
Hyphomonas	Oceanicaulis	0.961111	0.938889	pos	0.749448	1.04606e-33	6.64596786666667e-33	0.971831	0.957746	pos	0.579568	1.184511e-07	3.27766268327717e-05
Maricaulis	Oceanicaulis	0.972222	0.938889	pos	0.762576	1.662999e-35	1.22381316370656e-34	0.971831	0.957746	pos	0.537749	1.325121e-06	0.00023275
Ahrensia	Octadecabacter	0.933333	0.966667	pos	0.64891	6.814862e-23	1.16703746379155e-22	0.943662	0.971831	pos	0.201326	0.0922625	0.481912
Aurantimonas	Octadecabacter	0.944444	0.966667	pos	0.668268	1.202103e-24	2.620765248e-24	0.943662	0.971831	pos	0.257854	0.0299306	0.277959
Candidatus.Puniceispirillum	Octadecabacter	0.988889	0.966667	pos	0.685771	2.383805e-26	6.44472670921986e-26	0.971831	0.971831	pos	0.470833	3.416681e-05	0.00297278
Chelativorans	Octadecabacter	0.966667	0.966667	pos	0.667346	1.467129e-24	3.14549817097863e-24	0.985915	0.971831	pos	0.0979049	0.416635	0.799973
Citreicella	Octadecabacter	0.961111	0.966667	pos	0.615629	3.699232e-20	4.36069579097093e-20	0.957746	0.971831	pos	0.358583	0.0021359	0.0564319
Cytophaga	Octadecabacter	0.944444	0.966667	pos	0.677415	1.602322e-25	3.92548294601542e-25	0.929577	0.971831	pos	0.377062	0.00118979	0.0385854
Dinoroseobacter	Octadecabacter	0.977778	0.966667	pos	0.759213	4.9286e-35	3.51831895131086e-34	0.985915	0.971831	pos	0.503458	7.631663e-06	0.000949851
Hoeflea	Octadecabacter	0.944444	0.966667	pos	0.712732	3.21182e-29	1.29423444397463e-28	0.943662	0.971831	pos	0.192338	0.108066	0.509035
Jannaschia	Octadecabacter	0.972222	0.966667	pos	0.77292	5.244348e-37	4.3649464139738e-36	0.957746	0.971831	pos	0.577187	1.371533e-07	3.71382416747733e-05
Ketogulonicigenium	Octadecabacter	0.927778	0.966667	pos	0.677506	1.570134e-25	3.85654046907217e-25	0.915493	0.971831	pos	0.333115	0.00453099	0.0915915
Loktanella	Octadecabacter	0.933333	0.966667	pos	0.771077	9.837691e-37	8.11715976017316e-36	0.915493	0.971831	pos	0.65324	6.63089e-10	3.57627089482759e-07
Maribacter	Octadecabacter	0.955556	0.966667	pos	0.608583	1.277093e-19	1.38697393618234e-19	0.971831	0.971831	pos	0.375426	0.0012548	0.0399404
Maritimibacter	Octadecabacter	0.972222	0.966667	pos	0.78181	2.314506e-38	2.10068973142857e-37	0.957746	0.971831	pos	0.448946	8.603177e-05	0.00597348
Oceanibulbus	Octadecabacter	0.944444	0.966667	pos	0.766705	4.275915e-36	3.31296503658537e-35	0.915493	0.971831	pos	0.625927	5.313366e-09	2.30541826886394e-06
Acidiphilium	Oligotropha	0.966667	0.955556	pos	0.744993	4.024995e-33	2.43544141904762e-32	0.943662	0.957746	pos	0.334563	0.00434844	0.0891663
Aurantimonas	Oligotropha	0.944444	0.955556	pos	0.644339	1.694991e-22	2.78799122174288e-22	0.943662	0.957746	pos	0.146714	0.22212	0.654304
Beijerinckia	Oligotropha	0.916667	0.955556	pos	0.763662	1.166569e-35	8.6854707578125e-35	0.887324	0.957746	pos	0.451826	7.645933e-05	0.00546182
Candidatus.Pelagibacter	Oligotropha	0.994444	0.955556	pos	0.697261	1.55908e-27	4.93622338870432e-27	0.985915	0.957746	pos	0.399812	0.000551619	0.0229257
Candidatus.Puniceispirillum	Oligotropha	0.988889	0.955556	pos	0.660244	6.645141e-24	1.30171004583762e-23	0.971831	0.957746	pos	0.375418	0.0012551	0.0399435
Chelativorans	Oligotropha	0.966667	0.955556	pos	0.738724	2.558888e-32	1.44725238219585e-31	0.985915	0.957746	pos	0.18183	0.129111	0.544506
Fulvimarina	Oligotropha	0.955556	0.955556	pos	0.669552	9.098322e-25	2.00247133163972e-24	0.943662	0.957746	pos	0.264116	0.0260372	0.257452
Gluconobacter	Oligotropha	0.911111	0.955556	pos	0.639268	4.574066e-22	6.996926e-22	0.901408	0.957746	pos	0.294783	0.0125774	0.170918
Granulibacter	Oligotropha	0.961111	0.955556	pos	0.799182	3.336075e-41	3.47462237704918e-40	0.971831	0.957746	pos	0.216944	0.0691765	0.424993
Hoeflea	Oligotropha	0.944444	0.955556	pos	0.632189	1.773924e-21	2.50823378635015e-21	0.943662	0.957746	pos	0.435497	0.000147201	0.00894025
Maricaulis	Oligotropha	0.972222	0.955556	pos	0.667986	1.277655e-24	2.77043279863481e-24	0.971831	0.957746	pos	0.122524	0.308717	0.727239
Methylocella	Oligotropha	0.95	0.955556	pos	0.778392	7.815566e-38	6.83324256697248e-37	0.915493	0.957746	pos	0.140438	0.242747	0.673283
Chthoniobacter	Opitutus	0.916667	0.911111	pos	0.741227	1.230578e-32	7.21686667076923e-32	0.929577	0.915493	pos	0.566291	2.643783e-07	6.27430451781069e-05
Coraliomargarita	Opitutus	0.927778	0.911111	pos	0.602008	3.947808e-19	4.0259615024077e-19	0.929577	0.915493	pos	0.24666	0.0381111	0.316153
Lentisphaera	Opitutus	0.911111	0.911111	pos	0.603898	2.861373e-19	2.95905052928417e-19	0.887324	0.915493	pos	0.349049	0.0028509	0.0679037
Alicyclobacillus	Oscillochloris	0.8	0.744444	pos	0.615076	4.081809e-20	4.77882552457003e-20	0.647887	0.549296	pos	0.298379	0.0114904	0.161915
Anaeromyxobacter	Paenibacillus	0.95	0.944444	pos	0.649651	5.87006e-23	1.01068964408311e-22	0.957746	0.943662	pos	0.514011	4.543434e-06	0.000636381
Bacillus	Paenibacillus	1	0.944444	pos	0.688309	1.319376e-26	3.67650680701754e-26	1	0.943662	pos	0.605299	2.248497e-08	8.19678226564928e-06
Bacteroides	Paenibacillus	1	0.944444	pos	0.625113	6.640843e-21	8.66948408082192e-21	1	0.943662	pos	0.234409	0.0491121	0.358325
Burkholderia	Paenibacillus	1	0.944444	pos	0.656506	1.447879e-23	2.71887426009852e-23	1	0.943662	pos	0.280959	0.017625	0.207841
Clostridium	Paenibacillus	0.994444	0.944444	pos	0.695007	2.689092e-27	8.22698130337079e-27	0.985915	0.943662	pos	0.5561	4.782774e-07	0.000103282
Corynebacterium	Paenibacillus	0.961111	0.944444	pos	0.614415	4.590005e-20	5.33773613788896e-20	1	0.943662	pos	0.325078	0.0056733	0.105403
Desulfovibrio	Paenibacillus	0.972222	0.944444	pos	0.629112	3.162748e-21	4.32128866523298e-21	0.985915	0.943662	pos	0.549761	6.847574e-07	0.000135082
Frankia	Paenibacillus	0.977778	0.944444	pos	0.637047	7.023753e-22	1.05328664185681e-21	0.971831	0.943662	pos	0.486472	1.697614e-05	0.00174848
Geobacillus	Paenibacillus	0.95	0.944444	pos	0.62201	1.172533e-20	1.47320230586684e-20	0.971831	0.943662	pos	0.346888	0.00304	0.0709467
Geobacter	Paenibacillus	0.977778	0.944444	pos	0.709393	7.586005e-29	2.8962607752e-28	0.985915	0.943662	pos	0.52434	2.68848e-06	0.000420898
Marinobacter	Paenibacillus	0.983333	0.944444	pos	0.624027	8.108413e-21	1.04001582624495e-20	0.985915	0.943662	neg	0.0199883	0.868589	0.965864
Mycobacterium	Paenibacillus	0.988889	0.944444	pos	0.63025	2.555615e-21	3.55029314139942e-21	0.985915	0.943662	pos	0.453878	7.025052e-05	0.00511062
Nitrosococcus	Paenibacillus	0.966667	0.944444	pos	0.642178	2.593089e-22	4.16029262121212e-22	1	0.943662	pos	0.313289	0.0078072	0.128338
Chitinophaga	Paludibacter	0.972222	0.805556	pos	0.606462	1.843017e-19	1.96354969368362e-19	0.943662	0.704225	pos	0.418043	0.00028608	0.0144405
Chryseobacterium	Paludibacter	0.894444	0.805556	pos	0.640097	3.893755e-22	6.02753161525974e-22	0.830986	0.704225	pos	0.500054	8.988689e-06	0.00107872
Croceibacter	Paludibacter	0.972222	0.805556	pos	0.602263	3.780144e-19	3.85910790787359e-19	0.971831	0.704225	pos	0.476705	2.638e-05	0.00246155
Cytophaga	Paludibacter	0.944444	0.805556	pos	0.640565	3.554743e-22	5.53088992489796e-22	0.929577	0.704225	pos	0.478633	2.420725e-05	0.00229707
Dokdonia	Paludibacter	0.988889	0.805556	pos	0.643896	1.849892e-22	3.02911868728522e-22	0.985915	0.704225	pos	0.588499	6.763127e-08	2.08972989537629e-05
Kordia	Paludibacter	0.966667	0.805556	pos	0.612326	6.637817e-20	7.51287363539192e-20	0.971831	0.704225	pos	0.480697	2.206618e-05	0.00213987
Leadbetterella	Paludibacter	0.894444	0.805556	pos	0.701947	4.93964e-28	1.66931805673759e-27	0.816901	0.704225	pos	0.512703	4.849611e-06	0.000672953
Leeuwenhoekiella	Paludibacter	0.972222	0.805556	pos	0.635973	8.632581e-22	1.27252122088167e-21	0.971831	0.704225	pos	0.465425	4.317642e-05	0.00353742
Maribacter	Paludibacter	0.955556	0.805556	pos	0.629646	2.861651e-21	3.94097312572254e-21	0.971831	0.704225	pos	0.505704	6.84402e-06	0.000876053
Marivirga	Paludibacter	0.938889	0.805556	pos	0.6654	2.228521e-24	4.68308823153253e-24	0.901408	0.704225	pos	0.488567	1.54168e-05	0.00162978
Actinobacillus	Pantoea	0.933333	0.944444	pos	0.633969	1.265646e-21	1.82890164973465e-21	0.971831	0.943662	pos	0.414483	0.000326166	0.0158807
Burkholderia	Pantoea	1	0.944444	pos	0.631457	2.036583e-21	2.86052114812086e-21	1	0.943662	pos	0.4164	0.000303985	0.0150975
Dickeya	Pantoea	0.944444	0.944444	pos	0.621313	1.330961e-20	1.66348305967213e-20	0.971831	0.943662	pos	0.632612	3.25341e-09	1.49766463588235e-06
Escherichia	Pantoea	0.972222	0.944444	pos	0.630781	2.312828e-21	3.23185496187683e-21	1	0.943662	pos	0.500562	8.772919e-06	0.00105821
Geobacillus	Pantoea	0.95	0.944444	pos	0.617691	2.559336e-20	3.08740152911392e-20	0.971831	0.943662	pos	0.151339	0.207728	0.637717
Marinobacter	Pantoea	0.983333	0.944444	pos	0.684851	2.949171e-26	7.85072615363128e-26	0.985915	0.943662	pos	0.574662	1.600159e-07	4.22152790638554e-05
Nitrosococcus	Pantoea	0.966667	0.944444	pos	0.613265	5.625906e-20	6.45573560264901e-20	1	0.943662	pos	0.281446	0.0174216	0.206422
Acidiphilium	Parvularcula	0.966667	0.916667	pos	0.617522	2.638087e-20	3.17036180453972e-20	0.943662	0.957746	pos	0.108497	0.367776	0.769971
Ahrensia	Parvularcula	0.933333	0.916667	pos	0.610097	9.810733e-20	1.08150706176981e-19	0.943662	0.957746	pos	0.330572	0.00486816	0.0957342
Asticcacaulis	Parvularcula	0.911111	0.916667	pos	0.752241	4.430406e-34	2.96293117052632e-33	0.929577	0.957746	pos	0.298182	0.0115478	0.162383
Aurantimonas	Parvularcula	0.944444	0.916667	pos	0.697349	1.526102e-27	4.83985093510815e-27	0.943662	0.957746	pos	0.0453943	0.706988	0.927726
Beijerinckia	Parvularcula	0.916667	0.916667	pos	0.682431	5.144858e-26	1.3323504548913e-25	0.887324	0.957746	pos	0.232029	0.0515263	0.367356
Buchnera	Parvularcula	0.794444	0.916667	pos	0.607241	1.611172e-19	1.73008103211268e-19	0.676056	0.957746	neg	0.0552738	0.647076	0.908243
Chelativorans	Parvularcula	0.966667	0.916667	pos	0.740302	1.614542e-32	9.32520318787879e-32	0.985915	0.957746	pos	0.142627	0.235408	0.66703
Fulvimarina	Parvularcula	0.955556	0.916667	pos	0.677332	1.632721e-25	3.99482185622593e-25	0.943662	0.957746	pos	0.133232	0.268013	0.694125
Gluconobacter	Parvularcula	0.911111	0.916667	pos	0.640699	3.462882e-22	5.4011891096563e-22	0.901408	0.957746	pos	0.1641	0.171476	0.6005
Granulibacter	Parvularcula	0.961111	0.916667	pos	0.639457	4.409338e-22	6.76122142236525e-22	0.971831	0.957746	pos	0.141086	0.24056	0.672735
Hirschia	Parvularcula	0.938889	0.916667	pos	0.769715	1.560049e-36	1.25993787881356e-35	0.929577	0.957746	pos	0.425304	0.00021794	0.0119445
Hoeflea	Parvularcula	0.944444	0.916667	pos	0.683946	3.6338e-26	9.51376758241758e-26	0.943662	0.957746	pos	0.27146	0.0220243	0.235336
Hyphomonas	Parvularcula	0.961111	0.916667	pos	0.728792	4.308957e-31	2.16128211631579e-30	0.971831	0.957746	pos	0.466284	4.161216e-05	0.00343929
Maricaulis	Parvularcula	0.972222	0.916667	pos	0.717125	1.017562e-29	4.37804327765237e-29	0.971831	0.957746	pos	0.505118	7.041735e-06	0.000896123
Methylocella	Parvularcula	0.95	0.916667	pos	0.683184	4.329298e-26	1.12573560545703e-25	0.915493	0.957746	pos	0.267995	0.0238467	0.245505
Methylosinus	Parvularcula	0.861111	0.916667	pos	0.686114	2.201259e-26	5.98516355777461e-26	0.816901	0.957746	pos	0.290233	0.0140792	0.182429
Oceanicaulis	Parvularcula	0.938889	0.916667	pos	0.673161	4.127479e-25	9.41025714593301e-25	0.957746	0.957746	pos	0.290596	0.0139538	0.181574
Octadecabacter	Parvularcula	0.966667	0.916667	pos	0.605603	2.136896e-19	2.25396999225235e-19	0.971831	0.957746	pos	0.0316579	0.793256	0.953336
Oligotropha	Parvularcula	0.955556	0.916667	pos	0.619682	1.788396e-20	2.20056990058102e-20	0.957746	0.957746	pos	0.0617077	0.609199	0.894781
Citreicella	Pelagibaca	0.961111	0.933333	pos	0.770474	1.207014e-36	9.88975954506438e-36	0.957746	0.915493	pos	0.775774	1.949039e-15	2.64533720969008e-12
Dinoroseobacter	Pelagibaca	0.977778	0.933333	pos	0.638846	4.963876e-22	7.55682720127796e-22	0.985915	0.915493	pos	0.377525	0.00117194	0.0381828
Jannaschia	Pelagibaca	0.972222	0.933333	pos	0.660979	5.693986e-24	1.12931709843913e-23	0.957746	0.915493	pos	0.352915	0.00253853	0.0631184
Ketogulonicigenium	Pelagibaca	0.927778	0.933333	pos	0.605179	2.298147e-19	2.40806387135789e-19	0.915493	0.915493	pos	0.306694	0.00928452	0.142742
Loktanella	Pelagibaca	0.933333	0.933333	pos	0.6236	8.76926e-21	1.11950499397187e-20	0.915493	0.915493	pos	0.313908	0.00767973	0.127161
Maritimibacter	Pelagibaca	0.972222	0.933333	pos	0.66058	6.192597e-24	1.22185195465839e-23	0.957746	0.915493	pos	0.407125	0.000425788	0.0191212
Octadecabacter	Pelagibaca	0.966667	0.933333	pos	0.625941	5.700062e-21	7.50298216298343e-21	0.971831	0.915493	pos	0.397018	0.000608041	0.0245649
Anaeromyxobacter	Pelobacter	0.95	0.955556	pos	0.633699	1.332284e-21	1.91792545619335e-21	0.957746	0.971831	pos	0.527084	2.331756e-06	0.000373234
Citreicella	Phaeobacter	0.961111	0.961111	pos	0.625946	5.694894e-21	7.50136003040774e-21	0.957746	0.943662	pos	0.575202	1.548503e-07	4.13171042132413e-05
Dinoroseobacter	Phaeobacter	0.977778	0.961111	pos	0.656284	1.515804e-23	2.84082834218289e-23	0.985915	0.943662	pos	0.651765	7.459966e-10	3.98416769517073e-07
Jannaschia	Phaeobacter	0.972222	0.961111	pos	0.705444	2.063881e-28	7.38040747842402e-28	0.957746	0.943662	pos	0.703	8.221167e-12	7.16255545619363e-09
Loktanella	Phaeobacter	0.933333	0.961111	pos	0.66175	4.840512e-24	9.70138367192429e-24	0.915493	0.943662	pos	0.57863	1.255089e-07	3.44794537738294e-05
Maritimibacter	Phaeobacter	0.972222	0.961111	pos	0.707844	1.125761e-28	4.18265198050682e-28	0.957746	0.943662	pos	0.465497	4.304278e-05	0.00352911
Oceanibulbus	Phaeobacter	0.944444	0.961111	pos	0.640103	3.889272e-22	6.02753161525974e-22	0.915493	0.943662	pos	0.548673	7.277357e-07	0.00014215
Octadecabacter	Phaeobacter	0.966667	0.961111	pos	0.653772	2.541308e-23	4.57387445514636e-23	0.971831	0.943662	pos	0.624521	5.881933e-09	2.5090263682013e-06
Asticcacaulis	Phenylobacterium	0.911111	0.955556	pos	0.651407	4.115746e-23	7.2233995174954e-23	0.929577	0.957746	pos	0.416314	0.000304941	0.0151276
Chelativorans	Phenylobacterium	0.966667	0.955556	pos	0.655621	1.738394e-23	3.23572164453125e-23	0.985915	0.957746	pos	0.233576	0.0499466	0.361617
Hirschia	Phenylobacterium	0.938889	0.955556	pos	0.653538	2.666126e-23	4.77597383082707e-23	0.929577	0.957746	pos	0.420306	0.000262993	0.0135948
Hoeflea	Phenylobacterium	0.944444	0.955556	pos	0.633738	1.322483e-21	1.90669636762481e-21	0.943662	0.957746	pos	0.168615	0.159831	0.583814
Hyphomonas	Phenylobacterium	0.961111	0.955556	pos	0.705729	1.921331e-28	6.88356557518797e-28	0.971831	0.957746	pos	0.438784	0.000129358	0.00813016
Maricaulis	Phenylobacterium	0.972222	0.955556	pos	0.674331	3.187292e-25	7.44482665686275e-25	0.971831	0.957746	pos	0.360612	0.00200632	0.0540861
Parvularcula	Phenylobacterium	0.916667	0.955556	pos	0.676357	2.030633e-25	4.91789898094028e-25	0.957746	0.957746	pos	0.383292	0.000969178	0.0336005
Acinetobacter	Photobacterium	0.983333	0.977778	pos	0.687918	1.445796e-26	4.00535926744186e-26	1	0.985915	pos	0.388565	0.000885092	0.0316125
Actinobacillus	Photobacterium	0.933333	0.977778	pos	0.676124	2.138938e-25	5.16052636455696e-25	0.971831	0.985915	pos	0.523512	2.805711e-06	0.000435309
Aeromonas	Photobacterium	0.95	0.977778	pos	0.719675	5.168497e-30	2.29630659254079e-29	0.957746	0.985915	pos	0.871122	5.340512e-23	8.99547625107692e-20
Alteromonas	Photobacterium	0.977778	0.977778	pos	0.621535	1.278342e-20	1.60506280184332e-20	0.985915	0.985915	pos	0.820825	0	0
Bacillus	Photobacterium	1	0.977778	pos	0.732152	1.681481e-31	8.68537340379404e-31	1	0.985915	pos	0.0491281	0.683473	0.922526
Bacteroides	Photobacterium	1	0.977778	pos	0.712154	3.731196e-29	1.49404612941176e-28	1	0.985915	neg	0.233166	0.0505691	0.363968
Burkholderia	Photobacterium	1	0.977778	pos	0.768842	2.093033e-36	1.66917192384937e-35	1	0.985915	pos	0.311871	0.00834082	0.13373
Chlorobium	Photobacterium	0.972222	0.977778	pos	0.600052	5.494866e-19	5.50063791806723e-19	1	0.985915	pos	0.0461771	0.701565	0.926321
Clostridium	Photobacterium	0.994444	0.977778	pos	0.698078	1.278257e-27	4.09471906218487e-27	0.985915	0.985915	neg	0.14222	0.236183	0.667524
Corynebacterium	Photobacterium	0.961111	0.977778	pos	0.6424	2.483007e-22	3.98703567144061e-22	1	0.985915	neg	0.270423	0.0228419	0.239797
Desulfovibrio	Photobacterium	0.972222	0.977778	pos	0.611924	7.124635e-20	8.0115364660767e-20	0.985915	0.985915	pos	0.0950704	0.42945	0.807913
Dickeya	Photobacterium	0.944444	0.977778	pos	0.667552	1.403363e-24	3.02580302941176e-24	0.971831	0.985915	pos	0.675123	1.067692e-10	6.50628526641929e-08
Erythrobacter	Photobacterium	0.972222	0.977778	pos	0.703016	3.788076e-28	1.31035805009074e-27	0.985915	0.985915	pos	0.239906	0.0441236	0.340466
Escherichia	Photobacterium	0.972222	0.977778	pos	0.71989	4.879864e-30	2.17313569719626e-29	1	0.985915	pos	0.701677	0	0
Frankia	Photobacterium	0.977778	0.977778	pos	0.625983	5.656572e-21	7.46119462422145e-21	0.971831	0.985915	neg	0.0758725	0.529432	0.855968
Geobacillus	Photobacterium	0.95	0.977778	pos	0.692718	4.654035e-27	1.38386750546022e-26	0.971831	0.985915	pos	0.15317	0.202215	0.634851
Geobacter	Photobacterium	0.977778	0.977778	pos	0.663466	3.3662e-24	6.92870107991361e-24	0.985915	0.985915	pos	0.134038	0.264449	0.690482
Haemophilus	Photobacterium	0.961111	0.977778	pos	0.651274	4.228395e-23	7.40746403492647e-23	0.985915	0.985915	pos	0.279242	0.018642	0.214587
Idiomarina	Photobacterium	0.977778	0.977778	pos	0.691847	5.725653e-27	1.681524594453e-26	0.985915	0.985915	pos	0.811469	0	0
Klebsiella	Photobacterium	0.916667	0.977778	pos	0.631154	2.156078e-21	3.02390336129507e-21	0.943662	0.985915	pos	0.609525	1.687297e-08	6.37745841352129e-06
Lactobacillus	Photobacterium	0.944444	0.977778	pos	0.631021	2.210699e-21	3.09595319177076e-21	0.943662	0.985915	neg	0.0146558	0.903448	0.96972
Marinobacter	Photobacterium	0.983333	0.977778	pos	0.836508	2.234253e-48	3.27575862923077e-47	0.985915	0.985915	pos	0.600939	6.076766e-08	1.91365692860019e-05
Mycobacterium	Photobacterium	0.988889	0.977778	pos	0.62907	3.187194e-21	4.35157003151862e-21	0.985915	0.985915	neg	0.00828303	0.94531	0.983005
Neisseria	Photobacterium	0.95	0.977778	pos	0.625389	6.311513e-21	8.25651597666438e-21	0.929577	0.985915	neg	0.00218011	0.985604	0.996025
Nitrosococcus	Photobacterium	0.966667	0.977778	pos	0.663805	3.131958e-24	6.48859994347826e-24	1	0.985915	pos	0.176123	0.141548	0.563031
Aciduliprofundum	Picrophilus	0.777778	0.705556	pos	0.66541	2.223765e-24	4.67825175496689e-24	0.619718	0.521127	pos	0.421332	0.0002531	0.013282
Methanothermobacter	Picrophilus	0.744444	0.705556	pos	0.630085	2.635754e-21	3.653634272e-21	0.56338	0.521127	pos	0.40756	0.000419208	0.0189396
Blastopirellula	Pirellula	0.938889	0.911111	pos	0.689647	9.635549e-27	2.74519527563528e-26	0.915493	0.859155	pos	0.65409	6.194163e-10	3.36281621184298e-07
Chthoniobacter	Pirellula	0.916667	0.911111	pos	0.718362	7.332633e-30	3.19816899267735e-29	0.929577	0.859155	pos	0.70406	7.414023e-12	6.49379446524e-09
Lentisphaera	Pirellula	0.911111	0.911111	pos	0.693981	3.440792e-27	1.03768189113924e-26	0.887324	0.859155	pos	0.58053	1.116065e-07	3.10922077671756e-05
Anaeromyxobacter	Planctomyces	0.95	0.977778	pos	0.619726	1.77425e-20	2.18457396640827e-20	0.957746	0.985915	pos	0.606124	2.126659e-08	7.83084957225336e-06
Haliangium	Plesiocystis	0.938889	0.861111	pos	0.640047	3.931375e-22	6.07721066504461e-22	0.957746	0.816901	pos	0.435046	0.000149817	0.00904619
Myxococcus	Plesiocystis	0.911111	0.861111	pos	0.663562	3.297794e-24	6.80259238528138e-24	0.887324	0.816901	pos	0.541051	1.108004e-06	0.000200729
Oscillochloris	Plesiocystis	0.744444	0.861111	pos	0.652543	3.266483e-23	5.79155032372093e-23	0.549296	0.816901	pos	0.51035	5.449608e-06	0.000735093
Blattabacterium	Polaribacter	0.761111	0.994444	pos	0.630378	2.494727e-21	3.46823461852662e-21	0.605634	0.985915	pos	0.476671	2.642048e-05	0.00246392
Capnocytophaga	Polaribacter	0.972222	0.994444	pos	0.718536	7.001994e-30	3.06096343211009e-29	0.985915	0.985915	pos	0.820825	0	0
Chryseobacterium	Polaribacter	0.894444	0.994444	pos	0.664375	2.77377e-24	5.75904751633987e-24	0.830986	0.985915	pos	0.606805	2.030686e-08	7.51960507474634e-06
Croceibacter	Polaribacter	0.972222	0.994444	pos	0.846924	1.042522e-50	1.61548531056911e-49	0.971831	0.985915	pos	0.856865	1.555949e-21	2.555296143975e-18
Cytophaga	Polaribacter	0.944444	0.994444	pos	0.631655	1.961739e-21	2.76150261004431e-21	0.929577	0.985915	pos	0.586752	7.55711e-08	2.27722070188073e-05
Dokdonia	Polaribacter	0.988889	0.994444	pos	0.882823	2.597718e-60	5.44093462417582e-59	0.985915	0.985915	pos	0.830986	0	0
Kordia	Polaribacter	0.966667	0.994444	pos	0.845659	2.043504e-50	3.14106340645161e-49	0.971831	0.985915	pos	0.896537	4.233363e-26	7.76798460427374e-23
Leadbetterella	Polaribacter	0.894444	0.994444	pos	0.632691	1.61304e-21	2.29951700822737e-21	0.816901	0.985915	pos	0.510581	5.387756e-06	0.000729145
Leeuwenhoekiella	Polaribacter	0.972222	0.994444	pos	0.828736	9.6468e-47	1.32279142446043e-45	0.971831	0.985915	pos	0.698145	1.312097e-11	1.107878715e-08
Maribacter	Polaribacter	0.955556	0.994444	pos	0.802676	8.27929e-42	9.01732956571429e-41	0.971831	0.985915	pos	0.776767	1.702662e-15	2.330199363375e-12
Marivirga	Polaribacter	0.938889	0.994444	pos	0.707616	1.192648e-28	4.38839206177606e-28	0.901408	0.985915	pos	0.554586	5.214119e-07	0.000110941
Mucilaginibacter	Polaribacter	0.916667	0.994444	pos	0.628923	3.276214e-21	4.46033134571429e-21	0.887324	0.985915	pos	0.578291	1.281575e-07	3.50199431468386e-05
Paludibacter	Polaribacter	0.805556	0.994444	pos	0.604352	2.64813e-19	2.74460890701468e-19	0.704225	0.985915	pos	0.505224	7.005657e-06	0.000892223
Acidiphilium	Polynucleobacter	0.966667	0.9	pos	0.63146	2.035412e-21	2.86052114812086e-21	0.943662	0.830986	pos	0.461744	5.051997e-05	0.00399941
Albidiferax	Polynucleobacter	0.905556	0.9	pos	0.600085	5.464862e-19	5.47347712664214e-19	0.901408	0.830986	pos	0.386841	0.000860764	0.0310718
Aurantimonas	Polynucleobacter	0.944444	0.9	pos	0.663442	3.383095e-24	6.9559644768069e-24	0.943662	0.830986	pos	0.195464	0.102349	0.50073
Chelativorans	Polynucleobacter	0.966667	0.9	pos	0.613117	5.773883e-20	6.62155294705174e-20	0.985915	0.830986	pos	0.0348254	0.7731	0.94579
Hoeflea	Polynucleobacter	0.944444	0.9	pos	0.634041	1.248401e-21	1.80535076327769e-21	0.943662	0.830986	pos	0.276677	0.0195051	0.22024
Lactococcus	Polynucleobacter	0.761111	0.9	pos	0.609199	1.147321e-19	1.25461493172691e-19	0.56338	0.830986	pos	0.265653	0.0251497	0.252964
Methylococcus	Polynucleobacter	0.95	0.9	pos	0.709565	7.26123e-29	2.78468901006036e-28	0.971831	0.830986	pos	0.328634	0.00513984	0.099257
Octadecabacter	Polynucleobacter	0.966667	0.9	pos	0.606227	1.919333e-19	2.0402948678193e-19	0.971831	0.830986	pos	0.352526	0.00256855	0.0635692
Acinetobacter	Prevotella	0.983333	0.983333	pos	0.766969	3.915906e-36	3.05890034262295e-35	1	1	neg	0.104024	0.38712	0.781301
Actinobacillus	Prevotella	0.933333	0.983333	pos	0.608933	1.201722e-19	1.30809944717304e-19	0.971831	1	neg	0.0451043	0.708776	0.928793
Bacillus	Prevotella	1	0.983333	pos	0.70649	1.585843e-28	5.76835259160305e-28	1	1	pos	0.0455734	0.705287	0.927704
Bacteroides	Prevotella	1	0.983333	pos	0.833362	1.049942e-47	1.51605261515152e-46	1	1	pos	0.616667	2.162509e-08	7.90965360350779e-06
Bartonella	Prevotella	0.944444	0.983333	pos	0.609092	1.168816e-19	1.27519364396108e-19	0.915493	1	pos	0.0972284	0.419878	0.800471
Burkholderia	Prevotella	1	0.983333	pos	0.686593	1.969653e-26	5.37845074212034e-26	1	1	neg	0.0861167	0.474309	0.831023
Campylobacter	Prevotella	0.966667	0.983333	pos	0.615303	3.920267e-20	4.60667626510481e-20	0.957746	1	pos	0.285221	0.0159104	0.196033
Chlorobium	Prevotella	0.972222	0.983333	pos	0.638579	5.22702e-22	7.94473693779904e-22	1	1	pos	0.184507	0.123333	0.534636
Clostridium	Prevotella	0.994444	0.983333	pos	0.676413	2.005337e-25	4.86281465903308e-25	0.985915	1	pos	0.143763	0.2311	0.661716
Corynebacterium	Prevotella	0.961111	0.983333	pos	0.671447	6.016757e-25	1.34600221150235e-24	1	1	pos	0.254058	0.0327909	0.292026
Flavobacterium	Prevotella	0.988889	0.983333	pos	0.624234	7.806669e-21	1.00537237256757e-20	0.985915	1	pos	0.717036	0	0
Lactobacillus	Prevotella	0.944444	0.983333	pos	0.64381	1.881265e-22	3.07784642918455e-22	0.943662	1	pos	0.319544	0.00660072	0.115938
Marinobacter	Prevotella	0.983333	0.983333	pos	0.672077	5.239915e-25	1.18192638934911e-24	0.985915	1	neg	0.043159	0.720243	0.934276
Mycobacterium	Prevotella	0.988889	0.983333	pos	0.623943	8.235147e-21	1.05556087303295e-20	0.985915	1	pos	0.023776	0.843684	0.962751
Paracoccus	Prevotella	0.983333	0.983333	pos	0.625055	6.712814e-21	8.75744249418207e-21	1	1	pos	0.36603	0.00180694	0.0506182
Photobacterium	Prevotella	0.977778	0.983333	pos	0.643163	2.137018e-22	3.46356828911565e-22	0.985915	1	neg	0.196714	0.100099	0.496016
Cyanobium	Prochlorococcus	0.916667	1	pos	0.76467	8.381149e-36	6.33907539444444e-35	0.873239	1	pos	0.767439	5.896913e-15	7.809961933125e-12
Actinobacillus	Providencia	0.933333	0.95	pos	0.64328	2.088641e-22	3.39320114650767e-22	0.971831	0.957746	pos	0.547894	7.600593e-07	0.000146764
Aeromonas	Providencia	0.95	0.95	pos	0.618501	2.212846e-20	2.68642323312102e-20	0.957746	0.957746	pos	0.675532	1.030384e-10	6.31408165522388e-08
Bacillus	Providencia	1	0.95	pos	0.613034	5.859479e-20	6.71163880649038e-20	1	0.957746	pos	0.0355143	0.768735	0.945314
Burkholderia	Providencia	1	0.95	pos	0.651081	4.396976e-23	7.68160976718607e-23	1	0.957746	pos	0.301787	0.0105366	0.153952
Dickeya	Providencia	0.944444	0.95	pos	0.653533	2.669052e-23	4.77672592676056e-23	0.971831	0.957746	pos	0.631331	3.577297e-09	1.60736126694254e-06
Haemophilus	Providencia	0.961111	0.95	pos	0.600478	5.114131e-19	5.15197340697674e-19	0.985915	0.957746	pos	0.396761	0.000613495	0.0247209
Idiomarina	Providencia	0.977778	0.95	pos	0.673037	4.242154e-25	9.64862234367542e-25	0.985915	0.957746	pos	0.709279	4.428363e-12	4.00693655417355e-09
Marinobacter	Providencia	0.983333	0.95	pos	0.685092	2.789817e-26	7.44732661344538e-26	0.985915	0.957746	pos	0.583051	9.538778e-08	2.71260547877922e-05
Photobacterium	Providencia	0.977778	0.95	pos	0.690481	7.91479e-27	2.29264281762918e-26	0.985915	0.957746	pos	0.702706	8.459212e-12	7.35045099857143e-09
Proteus	Providencia	0.894444	0.95	pos	0.636548	7.732171e-22	1.15136858796875e-21	0.915493	0.957746	pos	0.68141	6.137424e-11	3.83974780937143e-08
Acinetobacter	Pseudoalteromonas	0.983333	0.988889	pos	0.702616	4.184134e-28	1.43434521654676e-27	1	0.985915	pos	0.400335	0.00059802	0.0242497
Actinobacillus	Pseudoalteromonas	0.933333	0.988889	pos	0.704952	2.335524e-28	8.28958797765363e-28	0.971831	0.985915	pos	0.478156	2.472865e-05	0.00233936
Aeromonas	Pseudoalteromonas	0.95	0.988889	pos	0.747467	1.911586e-33	1.19068069150327e-32	0.957746	0.985915	pos	0.903585	4.186453e-27	8.08859658891177e-24
Alteromonas	Pseudoalteromonas	0.977778	0.988889	pos	0.71511	1.728519e-29	7.24078508571429e-29	0.985915	0.985915	pos	0.901777	0	0
Bacillus	Pseudoalteromonas	1	0.988889	pos	0.716358	1.245731e-29	5.28811422271715e-29	1	0.985915	neg	0.0327968	0.785564	0.949684
Bacteroides	Pseudoalteromonas	1	0.988889	pos	0.702301	4.524303e-28	1.54539812150538e-27	1	0.985915	neg	0.372233	0.00149166	0.0447151
Burkholderia	Pseudoalteromonas	1	0.988889	pos	0.781846	2.284335e-38	2.08322608133971e-37	1	0.985915	pos	0.222133	0.062779	0.40525
Clostridium	Pseudoalteromonas	0.994444	0.988889	pos	0.672165	5.139463e-25	1.16201856204033e-24	0.985915	0.985915	neg	0.238967	0.0449784	0.343503
Dickeya	Pseudoalteromonas	0.944444	0.988889	pos	0.675972	2.213076e-25	5.33264583565107e-25	0.971831	0.985915	pos	0.628208	4.500399e-09	1.98413228663758e-06
Erythrobacter	Pseudoalteromonas	0.972222	0.988889	pos	0.655134	1.921527e-23	3.53858015652174e-23	0.985915	0.985915	pos	0.287223	0.0154316	0.192575
Escherichia	Pseudoalteromonas	0.972222	0.988889	pos	0.721771	2.9456e-30	1.35284665060241e-29	1	0.985915	pos	0.742186	0	0
Geobacillus	Pseudoalteromonas	0.95	0.988889	pos	0.688807	1.174011e-26	3.30039080530973e-26	0.971831	0.985915	pos	0.185112	0.122228	0.532565
Geobacter	Pseudoalteromonas	0.977778	0.988889	pos	0.636313	8.088436e-22	1.19973221914397e-21	0.985915	0.985915	pos	0.0369215	0.759355	0.945314
Haemophilus	Pseudoalteromonas	0.961111	0.988889	pos	0.64159	2.909799e-22	4.621730745e-22	0.985915	0.985915	pos	0.208451	0.0811392	0.45719
Idiomarina	Pseudoalteromonas	0.977778	0.988889	pos	0.764692	8.320176e-36	6.31803006215139e-35	0.985915	0.985915	pos	0.906036	0	0
Marinobacter	Pseudoalteromonas	0.983333	0.988889	pos	0.817437	1.660099e-44	2.01538133375796e-43	0.985915	0.985915	pos	0.62438	1.216674e-08	4.76308294004768e-06
Methylobacterium	Pseudoalteromonas	1	0.988889	pos	0.6255	6.183895e-21	8.09512628434066e-21	1	0.985915	neg	0.170926	0.153821	0.578918
Nitrosococcus	Pseudoalteromonas	0.966667	0.988889	pos	0.675349	2.542158e-25	6.056691435e-25	1	0.985915	pos	0.0129779	0.914345	0.973295
Pantoea	Pseudoalteromonas	0.944444	0.988889	pos	0.64131	3.073788e-22	4.8538856072908e-22	0.943662	0.985915	pos	0.60327	2.577063e-08	9.24071209241266e-06
Photobacterium	Pseudoalteromonas	0.977778	0.988889	pos	0.856479	5.265833e-53	8.96131937321428e-52	0.985915	0.985915	pos	0.843394	0	0
Prevotella	Pseudoalteromonas	0.983333	0.988889	pos	0.610008	9.964416e-20	1.09654601016166e-19	1	0.985915	neg	0.305533	0.00981592	0.147731
Providencia	Pseudoalteromonas	0.95	0.988889	pos	0.708014	1.077988e-28	4.02083195303327e-28	0.957746	0.985915	pos	0.697911	1.341676e-11	1.12705931094629e-08
Acinetobacter	Pseudomonas	0.983333	1	pos	0.770108	1.36641e-36	1.10824572765957e-35	1	1	pos	0.58444	1.623127e-07	4.27182835564904e-05
Actinobacillus	Pseudomonas	0.933333	1	pos	0.674437	3.113035e-25	7.29820997539975e-25	0.971831	1	pos	0.620461	7.866966e-09	3.24289143829987e-06
Aeromonas	Pseudomonas	0.95	1	pos	0.637501	6.435981e-22	9.70488907120253e-22	0.957746	1	pos	0.557765	4.346986e-07	9.49959605209581e-05
Bacillus	Pseudomonas	1	1	pos	0.783325	0	0	1	1	pos	0.128303	0.285573	0.708445
Bacteroides	Pseudomonas	1	1	pos	0.774939	2.614089e-37	2.20462550176991e-36	1	1	neg	0.153622	0.200409	0.632803
Burkholderia	Pseudomonas	1	1	pos	0.803152	0	0	1	1	pos	0.658182	0	0
Chlorobium	Pseudomonas	0.972222	1	pos	0.622038	1.166487e-20	1.46657270580475e-20	1	1	pos	0.0875587	0.466918	0.826678
Clostridium	Pseudomonas	0.994444	1	pos	0.73156	0	0	0.985915	1	neg	0.167438	0.162491	0.587819
Corynebacterium	Pseudomonas	0.961111	1	pos	0.67487	2.82817e-25	6.67966793060719e-25	1	1	pos	0.0617036	0.608465	0.894615
Dickeya	Pseudomonas	0.944444	1	pos	0.627495	4.274054e-21	5.74495551763047e-21	0.971831	1	pos	0.593835	4.79976e-08	1.57022427370518e-05
Erythrobacter	Pseudomonas	0.972222	1	pos	0.666754	1.666691e-24	3.54148611594203e-24	0.985915	1	pos	0.309792	0.00880166	0.138269
Escherichia	Pseudomonas	0.972222	1	pos	0.680117	8.714855e-26	2.20884489760638e-25	1	1	pos	0.478907	3.00816e-05	0.0027159
Frankia	Pseudomonas	0.977778	1	pos	0.666083	1.925081e-24	4.0678540864745e-24	0.971831	1	pos	0.147235	0.220466	0.652529
Geobacillus	Pseudomonas	0.95	1	pos	0.684308	3.342883e-26	8.81777551590595e-26	0.971831	1	pos	0.173174	0.148676	0.571257
Geobacter	Pseudomonas	0.977778	1	pos	0.667109	1.543847e-24	3.29884796188341e-24	0.985915	1	pos	0.224983	0.0594155	0.394497
Haemophilus	Pseudomonas	0.961111	1	pos	0.65299	2.982291e-23	5.31238004299065e-23	0.985915	1	pos	0.386687	0.000941053	0.0329654
Klebsiella	Pseudomonas	0.916667	1	pos	0.651228	4.2675e-23	7.46910468319559e-23	0.943662	1	pos	0.574746	1.59202e-07	4.2102007173913e-05
Marinobacter	Pseudomonas	0.983333	1	pos	0.7682	2.596254e-36	2.03640334320988e-35	0.985915	1	pos	0.777364	0	0
Methylobacterium	Pseudomonas	1	1	pos	0.621558	0	0	1	1	neg	0.0454058	0.706322	0.927704
Mycobacterium	Pseudomonas	0.988889	1	pos	0.662676	3.979786e-24	8.08685726652452e-24	0.985915	1	pos	0.29497	0.0127846	0.172515
Nitrosococcus	Pseudomonas	0.966667	1	pos	0.679457	1.011795e-25	2.53747535526316e-25	1	1	pos	0.487257	2.100471e-05	0.00206667
Photobacterium	Pseudomonas	0.977778	1	pos	0.75167	5.285631e-34	3.52252191818182e-33	0.985915	1	pos	0.571932	3.282934e-07	7.50902567527855e-05
Prevotella	Pseudomonas	0.983333	1	pos	0.690354	8.155983e-27	2.3517857183056e-26	1	1	neg	0.0799799	0.506459	0.846693
Providencia	Pseudomonas	0.95	1	pos	0.668043	1.262022e-24	2.73965140318907e-24	0.957746	1	pos	0.583353	9.360326e-08	2.67110849377063e-05
Pseudoalteromonas	Pseudomonas	0.988889	1	pos	0.738286	2.906394e-32	1.61976227017544e-31	0.985915	1	pos	0.538095	1.946578e-06	0.000319682
Acidiphilium	Pseudovibrio	0.966667	0.95	pos	0.637395	6.569838e-22	9.89108311848341e-22	0.943662	0.929577	pos	0.0878491	0.466307	0.826678
Acinetobacter	Pseudovibrio	0.983333	0.95	neg	0.608379	1.32313e-19	1.43451978384528e-19	1	0.929577	neg	0.252624	0.033547	0.295325
Ahrensia	Pseudovibrio	0.933333	0.95	pos	0.812302	1.533377e-43	1.81528979006211e-42	0.943662	0.929577	pos	0.309568	0.00861314	0.136465
Aurantimonas	Pseudovibrio	0.944444	0.95	pos	0.684017	3.574451e-26	9.38416474655648e-26	0.943662	0.929577	pos	0.222574	0.0620928	0.402794
Bacteroides	Pseudovibrio	1	0.95	neg	0.602266	3.778563e-19	3.85910790787359e-19	1	0.929577	pos	0.166594	0.164968	0.591318
Beijerinckia	Pseudovibrio	0.916667	0.95	pos	0.70604	1.776426e-28	6.40050653308129e-28	0.887324	0.929577	pos	0.103477	0.39048	0.784009
Candidatus.Pelagibacter	Pseudovibrio	0.994444	0.95	pos	0.643144	2.145216e-22	3.47390118606627e-22	0.985915	0.929577	pos	0.392755	0.000704276	0.0271347
Candidatus.Puniceispirillum	Pseudovibrio	0.988889	0.95	pos	0.691071	6.882825e-27	2.00591199541284e-26	0.971831	0.929577	pos	0.356602	0.00226961	0.0586426
Chelativorans	Pseudovibrio	0.966667	0.95	pos	0.733747	1.070276e-31	5.65082009972299e-31	0.985915	0.929577	pos	0.244675	0.0397393	0.322964
Dinoroseobacter	Pseudovibrio	0.977778	0.95	pos	0.692079	5.418974e-27	1.59637781205564e-26	0.985915	0.929577	pos	0.253161	0.0331598	0.293524
Fulvimarina	Pseudovibrio	0.955556	0.95	pos	0.782802	1.619333e-38	1.48386956634615e-37	0.943662	0.929577	pos	0.156696	0.191898	0.621644
Gluconobacter	Pseudovibrio	0.911111	0.95	pos	0.609941	1.008233e-19	1.10888176457011e-19	0.901408	0.929577	pos	0.270595	0.022468	0.237936
Granulibacter	Pseudovibrio	0.961111	0.95	pos	0.640473	3.61897e-22	5.6262290538336e-22	0.971831	0.929577	pos	0.0713741	0.554193	0.871521
Hirschia	Pseudovibrio	0.938889	0.95	pos	0.632778	1.586599e-21	2.2669098155922e-21	0.929577	0.929577	pos	0.0146931	0.903204	0.96972
Hoeflea	Pseudovibrio	0.944444	0.95	pos	0.724914	1.255231e-30	5.92195615346535e-30	0.943662	0.929577	pos	0.247497	0.037441	0.313224
Jannaschia	Pseudovibrio	0.972222	0.95	pos	0.739323	2.149278e-32	1.23018734774775e-31	0.957746	0.929577	pos	0.266083	0.0249059	0.251674
Ketogulonicigenium	Pseudovibrio	0.927778	0.95	pos	0.736908	4.329453e-32	2.39186591826087e-31	0.915493	0.929577	pos	0.0452757	0.707719	0.928252
Loktanella	Pseudovibrio	0.933333	0.95	pos	0.698331	1.201656e-27	3.87539143147208e-27	0.915493	0.929577	pos	0.285729	0.0157159	0.194615
Maricaulis	Pseudovibrio	0.972222	0.95	pos	0.780656	3.498429e-38	3.14528569528302e-37	0.971831	0.929577	pos	0.151083	0.208506	0.638761
Maritimibacter	Pseudovibrio	0.972222	0.95	pos	0.707104	1.358105e-28	4.96842251439539e-28	0.957746	0.929577	pos	0.293956	0.0128395	0.172917
Methylocella	Pseudovibrio	0.95	0.95	pos	0.699192	9.735131e-28	3.16640950273038e-27	0.915493	0.929577	pos	0.203716	0.0883831	0.472392
Methylosinus	Pseudovibrio	0.861111	0.95	pos	0.640845	3.365726e-22	5.26257075963905e-22	0.816901	0.929577	pos	0.316412	0.00718256	0.12209
Oceanicaulis	Pseudovibrio	0.938889	0.95	pos	0.600922	4.744828e-19	4.79768815278515e-19	0.957746	0.929577	pos	0.137955	0.25126	0.680887
Octadecabacter	Pseudovibrio	0.966667	0.95	pos	0.610525	9.104634e-20	1.00833424776293e-19	0.971831	0.929577	pos	0.21808	0.0676974	0.420252
Oligotropha	Pseudovibrio	0.955556	0.95	pos	0.641752	2.819167e-22	4.48899941687552e-22	0.957746	0.929577	pos	0.11716	0.330534	0.743857
Parvularcula	Pseudovibrio	0.916667	0.95	pos	0.644966	1.497189e-22	2.48358767101828e-22	0.957746	0.929577	pos	0.206983	0.083287	0.462642
Phenylobacterium	Pseudovibrio	0.955556	0.95	pos	0.656242	1.528985e-23	2.86271651277014e-23	0.957746	0.929577	pos	0.187999	0.116409	0.524912
Burkholderia	Psychrobacter	1	0.966667	pos	0.622357	1.100612e-20	1.38741168783069e-20	1	0.971831	pos	0.329128	0.00506938	0.0983883
Erythrobacter	Psychrobacter	0.972222	0.966667	pos	0.600449	5.139082e-19	5.17164218162619e-19	0.985915	0.971831	pos	0.250908	0.0348113	0.301512
Marinobacter	Psychrobacter	0.983333	0.966667	pos	0.62	1.688582e-20	2.08853815184945e-20	0.985915	0.971831	pos	0.504464	7.268884e-06	0.000920039
Pseudoalteromonas	Psychrobacter	0.988889	0.966667	pos	0.627891	3.971103e-21	5.34906170883392e-21	0.985915	0.971831	pos	0.376781	0.00120074	0.0388179
Algoriphagus	Psychroflexus	0.955556	0.966667	pos	0.660937	5.744509e-24	1.13815323846154e-23	0.971831	0.971831	pos	0.465425	4.317597e-05	0.00353742
Blattabacterium	Psychroflexus	0.761111	0.966667	pos	0.622254	1.121388e-20	1.4117341664465e-20	0.605634	0.971831	pos	0.387887	0.000830988	0.0303809
Chitinophaga	Psychroflexus	0.972222	0.966667	pos	0.699696	8.604818e-28	2.81800397044674e-27	0.943662	0.971831	pos	0.50371	7.5393e-06	0.000941567
Chryseobacterium	Psychroflexus	0.894444	0.966667	pos	0.733635	1.104852e-31	5.80495665564738e-31	0.830986	0.971831	pos	0.614887	1.164935e-08	4.59338205792317e-06
Croceibacter	Psychroflexus	0.972222	0.966667	pos	0.826054	3.385253e-46	4.51209246013986e-45	0.971831	0.971831	pos	0.795897	1.094277e-16	1.5626989218913e-13
Cytophaga	Psychroflexus	0.944444	0.966667	pos	0.721472	3.192049e-30	1.45551325215311e-29	0.929577	0.971831	pos	0.623047	6.539922e-09	2.74689268607417e-06
Dokdonia	Psychroflexus	0.988889	0.966667	pos	0.85786	2.375813e-53	4.15440328256881e-52	0.985915	0.971831	pos	0.701113	9.870586e-12	8.44282115789062e-09
Dyadobacter	Psychroflexus	0.955556	0.966667	pos	0.647034	9.923627e-23	1.67829929565217e-22	0.943662	0.971831	pos	0.448943	8.604077e-05	0.00597348
Kordia	Psychroflexus	0.966667	0.966667	pos	0.787378	3.0396e-39	2.86324859605911e-38	0.971831	0.971831	pos	0.726379	7.539213e-13	8.337684195e-10
Leadbetterella	Psychroflexus	0.894444	0.966667	pos	0.685397	2.599202e-26	6.98741750634697e-26	0.816901	0.971831	pos	0.337554	0.00399188	0.0844706
Leeuwenhoekiella	Psychroflexus	0.972222	0.966667	pos	0.797554	6.32612e-41	6.51761336216216e-40	0.971831	0.971831	pos	0.709544	4.312791e-12	3.91314300526243e-09
Maribacter	Psychroflexus	0.955556	0.966667	pos	0.793504	3.032397e-40	3.02604643036649e-39	0.971831	0.971831	pos	0.670174	1.635518e-10	9.71417838499096e-08
Marivirga	Psychroflexus	0.938889	0.966667	pos	0.777047	1.254119e-37	1.08160670316742e-36	0.901408	0.971831	pos	0.466487	4.124939e-05	0.00341675
Mucilaginibacter	Psychroflexus	0.916667	0.966667	pos	0.612697	6.218077e-20	7.06296469725864e-20	0.887324	0.971831	pos	0.585436	8.212265e-08	2.3976528894e-05
Paludibacter	Psychroflexus	0.805556	0.966667	pos	0.701248	5.871381e-28	1.95986903432574e-27	0.704225	0.971831	pos	0.43082	0.000176512	0.0101713
Polaribacter	Psychroflexus	0.994444	0.966667	pos	0.829322	7.30882e-47	1.00946455942029e-45	0.985915	0.971831	pos	0.784296	5.976558e-16	8.31792524529661e-13
Acinetobacter	Psychromonas	0.983333	0.944444	pos	0.639539	4.339389e-22	6.66468608702659e-22	1	0.957746	pos	0.404776	0.000463022	0.0203209
Actinobacillus	Psychromonas	0.933333	0.944444	pos	0.654119	2.367094e-23	4.28459749667616e-23	0.971831	0.957746	pos	0.378336	0.0011413	0.0375202
Aeromonas	Psychromonas	0.95	0.944444	pos	0.705377	2.099019e-28	7.4780004e-28	0.957746	0.957746	pos	0.736904	2.369935e-13	2.72034899874564e-10
Alteromonas	Psychromonas	0.977778	0.944444	pos	0.644701	1.577621e-22	2.61009921248916e-22	0.985915	0.957746	pos	0.671518	1.4578e-10	8.75359595978062e-08
Bacillus	Psychromonas	1	0.944444	pos	0.610069	9.859741e-20	1.0862812916763e-19	1	0.957746	pos	0.0754888	0.531523	0.857188
Bacteroides	Psychromonas	1	0.944444	pos	0.619115	1.981088e-20	2.41738394878361e-20	1	0.957746	neg	0.248298	0.0368088	0.310439
Burkholderia	Psychromonas	1	0.944444	pos	0.628801	3.351483e-21	4.5562957189729e-21	1	0.957746	pos	0.255374	0.0316025	0.286131
Dickeya	Psychromonas	0.944444	0.944444	pos	0.627146	4.560679e-21	6.09583041654979e-21	0.971831	0.957746	pos	0.539459	1.208111e-06	0.00021601
Geobacillus	Psychromonas	0.95	0.944444	pos	0.607182	1.627789e-19	1.74399428555368e-19	0.971831	0.957746	pos	0.133825	0.265868	0.691737
Idiomarina	Psychromonas	0.977778	0.944444	pos	0.705323	2.127588e-28	7.56563941791045e-28	0.985915	0.957746	pos	0.721218	1.304279e-12	1.40458019326230e-09
Marinobacter	Psychromonas	0.983333	0.944444	pos	0.726763	7.557515e-31	3.65599583502538e-30	0.985915	0.957746	pos	0.510212	5.487058e-06	0.000738628
Nitrosococcus	Psychromonas	0.966667	0.944444	pos	0.637855	6.011977e-22	9.10876642448331e-22	1	0.957746	pos	0.111841	0.353105	0.761631
Pantoea	Psychromonas	0.944444	0.944444	pos	0.655157	1.912508e-23	3.52537741586073e-23	0.943662	0.957746	pos	0.600892	3.020058e-08	1.06084894197115e-05
Photobacterium	Psychromonas	0.977778	0.944444	pos	0.695205	2.564176e-27	7.88277331612903e-27	0.985915	0.957746	pos	0.633254	3.101792e-09	1.43695217399154e-06
Providencia	Psychromonas	0.95	0.944444	pos	0.613403	5.490012e-20	6.30739172513562e-20	0.957746	0.957746	pos	0.459521	5.549847e-05	0.00427007
Pseudoalteromonas	Psychromonas	0.988889	0.944444	pos	0.787592	2.808791e-39	2.676777823e-38	0.985915	0.957746	pos	0.737214	2.288444e-13	2.63737148778947e-10
Pseudomonas	Psychromonas	1	0.944444	pos	0.615421	3.839001e-20	4.51574670080197e-20	1	0.957746	pos	0.449881	8.280823e-05	0.00581103
Acinetobacter	Ralstonia	0.983333	0.972222	pos	0.640094	3.896075e-22	6.02753161525974e-22	1	0.985915	pos	0.328706	0.00532611	0.101458
Bacillus	Ralstonia	1	0.972222	pos	0.600611	5.00042e-19	5.04542113287454e-19	1	0.985915	pos	0.000503018	0.99678	1
Bacteroides	Ralstonia	1	0.972222	pos	0.614984	4.14932e-20	4.85190424539877e-20	1	0.985915	neg	0.0636821	0.596999	0.887838
Burkholderia	Ralstonia	1	0.972222	pos	0.682155	5.479673e-26	1.41329590500677e-25	1	0.985915	pos	0.417673	0.000327343	0.0159262
Corynebacterium	Ralstonia	0.961111	0.972222	pos	0.60757	1.522235e-19	1.64012431317128e-19	1	0.985915	pos	0.0783032	0.515435	0.852565
Escherichia	Ralstonia	0.972222	0.972222	pos	0.668067	1.25569e-24	2.73212915525114e-24	1	0.985915	pos	0.244668	0.0399936	0.324015
Geobacillus	Ralstonia	0.95	0.972222	pos	0.613771	5.144119e-20	5.9422368569697e-20	0.971831	0.985915	pos	0.0786056	0.514662	0.85208
Marinobacter	Ralstonia	0.983333	0.972222	pos	0.629941	2.707886e-21	3.74817045461147e-21	0.985915	0.985915	pos	0.296613	0.012277	0.16858
Photobacterium	Ralstonia	0.977778	0.972222	pos	0.667479	1.425678e-24	3.06352003156708e-24	0.985915	0.985915	pos	0.180181	0.132493	0.547353
Pseudomonas	Ralstonia	1	0.972222	pos	0.602326	3.739879e-19	3.82209617908847e-19	1	0.985915	pos	0.331321	0.00495701	0.0969601
Azotobacter	Reinekea	0.966667	0.955556	pos	0.617319	2.735752e-20	3.28152505475142e-20	0.985915	0.985915	pos	0.510161	7.499492e-06	0.000938737
Cellvibrio	Reinekea	0.95	0.955556	pos	0.630712	2.343169e-21	3.27185356336996e-21	0.971831	0.985915	pos	0.587367	7.267859e-08	2.21307743202039e-05
Congregibacter	Reinekea	0.95	0.955556	pos	0.626442	5.195746e-21	6.89150443702157e-21	0.971831	0.985915	pos	0.411959	0.000357648	0.0169536
Leifsonia	Renibacterium	0.655556	0.672222	pos	0.616634	3.09245e-20	3.67698671241422e-20	0.422535	0.507042	pos	0.409202	0.00039517	0.0182477
Acinetobacter	Rhizobium	0.983333	0.988889	pos	0.631744	1.929092e-21	2.71956313017751e-21	1	0.985915	neg	0.211771	0.0763317	0.444925
Bacillus	Rhizobium	1	0.988889	pos	0.620497	1.543359e-20	1.91637931856678e-20	1	0.985915	pos	0.0633803	0.598742	0.888541
Bacteroides	Rhizobium	1	0.988889	pos	0.667879	1.307564e-24	2.82885015209989e-24	1	0.985915	pos	0.0949698	0.42994	0.80793
Bartonella	Rhizobium	0.944444	0.988889	pos	0.692696	4.678684e-27	1.38902986043614e-26	0.915493	0.985915	pos	0.553549	5.5306e-07	0.000116866
Bradyrhizobium	Rhizobium	0.988889	0.988889	pos	0.615746	3.623237e-20	4.27874208302354e-20	1	0.985915	pos	0.396043	0.000691021	0.026819
Burkholderia	Rhizobium	1	0.988889	pos	0.612076	6.936716e-20	7.82330218698225e-20	1	0.985915	pos	0.0369215	0.759355	0.945314
Campylobacter	Rhizobium	0.966667	0.988889	pos	0.606673	1.77732e-19	1.89567538891998e-19	0.957746	0.985915	pos	0.20601	0.0847806	0.466498
Clostridium	Rhizobium	0.994444	0.988889	pos	0.639623	4.269499e-22	6.56263314032258e-22	0.985915	0.985915	pos	0.338967	0.00400496	0.0846528
Marinobacter	Rhizobium	0.983333	0.988889	pos	0.628036	3.864992e-21	5.21719175070822e-21	0.985915	0.985915	neg	0.114621	0.340394	0.751554
Prevotella	Rhizobium	0.983333	0.988889	pos	0.650263	5.187815e-23	8.98090407811081e-23	1	0.985915	neg	0.103655	0.388813	0.782493
Ahrensia	Rhodobacter	0.933333	1	pos	0.655052	1.954428e-23	3.59222735583414e-23	0.943662	1	pos	0.161516	0.178414	0.607796
Candidatus.Puniceispirillum	Rhodobacter	0.988889	1	pos	0.723117	2.046827e-30	9.49209796107056e-30	0.971831	1	pos	0.483019	1.98696e-05	0.00198669
Citreicella	Rhodobacter	0.961111	1	pos	0.733404	1.179781e-31	6.17764446703297e-31	0.957746	1	pos	0.50005	8.990296e-06	0.00107872
Dinoroseobacter	Rhodobacter	0.977778	1	pos	0.854289	1.829099e-52	2.9797117042735e-51	0.985915	1	pos	0.70778	0	0
Fulvimarina	Rhodobacter	0.955556	1	pos	0.616423	3.211036e-20	3.8084845152458e-20	0.943662	1	pos	0.123082	0.3065	0.727239
Hoeflea	Rhodobacter	0.944444	1	pos	0.663946	3.0392e-24	6.30328095756257e-24	0.943662	1	pos	0.362807	0.00187412	0.0518893
Jannaschia	Rhodobacter	0.972222	1	pos	0.855097	1.158133e-52	1.91947956347826e-51	0.957746	1	pos	0.623529	6.317697e-09	2.67407109295747e-06
Ketogulonicigenium	Rhodobacter	0.927778	1	pos	0.719435	5.511322e-30	2.43725747842227e-29	0.915493	1	pos	0.342371	0.00347191	0.0773539
Loktanella	Rhodobacter	0.933333	1	pos	0.853938	2.228893e-52	3.60022886271186e-51	0.915493	1	pos	0.689119	3.054196e-11	1.98646722213861e-08
Maritimibacter	Rhodobacter	0.972222	1	pos	0.832471	1.618497e-47	2.30213080746269e-46	0.957746	1	pos	0.570844	2.01545e-07	5.15163135992218e-05
Oceanibulbus	Rhodobacter	0.944444	1	pos	0.719344	5.646985e-30	2.49147069675926e-29	0.915493	1	pos	0.610038	1.628963e-08	6.19978032636153e-06
Octadecabacter	Rhodobacter	0.966667	1	pos	0.723443	1.873657e-30	8.71022010243902e-30	0.971831	1	pos	0.690448	2.702003e-11	1.78210119551205e-08
Pelagibaca	Rhodobacter	0.933333	1	pos	0.709869	6.716634e-29	2.58624331393939e-28	0.915493	1	pos	0.498989	9.457303e-06	0.00112019
Phaeobacter	Rhodobacter	0.961111	1	pos	0.679707	9.561306e-26	2.40420174617414e-25	0.943662	1	pos	0.708544	4.765269e-12	4.28815460108219e-09
Pseudovibrio	Rhodobacter	0.95	1	pos	0.662635	4.014247e-24	8.14819465601704e-24	0.929577	1	pos	0.364548	0.00177488	0.0500103
Acidiphilium	Rhodomicrobium	0.966667	0.922222	pos	0.619971	1.697557e-20	2.09827732944228e-20	0.943662	0.929577	pos	0.0944738	0.433231	0.809872
Acinetobacter	Rhodomicrobium	0.983333	0.922222	neg	0.604466	2.59678e-19	2.69431827980403e-19	1	0.929577	neg	0.296227	0.0121307	0.167236
Ahrensia	Rhodomicrobium	0.933333	0.922222	pos	0.769392	1.739971e-36	1.39931844978903e-35	0.943662	0.929577	pos	0.321644	0.00623419	0.11182
Aurantimonas	Rhodomicrobium	0.944444	0.922222	pos	0.670699	7.085988e-25	1.57228092293364e-24	0.943662	0.929577	pos	0.191598	0.109456	0.511642
Bacteroides	Rhodomicrobium	1	0.922222	neg	0.604492	2.585328e-19	2.68535976457766e-19	1	0.929577	pos	0.0814691	0.499416	0.842137
Beijerinckia	Rhodomicrobium	0.916667	0.922222	pos	0.742517	8.412096e-33	5.01045468e-32	0.887324	0.929577	pos	0.230684	0.0529329	0.372213
Candidatus.Pelagibacter	Rhodomicrobium	0.994444	0.922222	pos	0.751589	5.419559e-34	3.58669425486111e-33	0.985915	0.929577	pos	0.518061	3.706025e-06	0.000539806
Chelativorans	Rhodomicrobium	0.966667	0.922222	pos	0.675185	2.636478e-25	6.25794155417186e-25	0.985915	0.929577	pos	0.29465	0.0126191	0.171188
Coxiella	Rhodomicrobium	0.927778	0.922222	pos	0.601695	4.162975e-19	4.23858458867521e-19	0.915493	0.929577	pos	0.227872	0.0559755	0.382791
Fulvimarina	Rhodomicrobium	0.955556	0.922222	pos	0.709387	7.597746e-29	2.8962607752e-28	0.943662	0.929577	pos	0.135866	0.25858	0.688483
Gluconobacter	Rhodomicrobium	0.911111	0.922222	pos	0.624115	7.979395e-21	1.02415669158249e-20	0.901408	0.929577	pos	0.264555	0.0257809	0.256283
Granulibacter	Rhodomicrobium	0.961111	0.922222	pos	0.661794	4.79559e-24	9.6214679368421e-24	0.971831	0.929577	pos	0.300489	0.0108915	0.157057
Hirschia	Rhodomicrobium	0.938889	0.922222	pos	0.621531	1.279166e-20	1.60506280184332e-20	0.929577	0.929577	pos	0.126568	0.292896	0.715042
Hoeflea	Rhodomicrobium	0.944444	0.922222	pos	0.642057	2.655358e-22	4.24589962080537e-22	0.943662	0.929577	pos	0.260243	0.0283909	0.270129
Jannaschia	Rhodomicrobium	0.972222	0.922222	pos	0.607677	1.494055e-19	1.61067241515837e-19	0.957746	0.929577	pos	0.0178775	0.882361	0.969126
Maricaulis	Rhodomicrobium	0.972222	0.922222	pos	0.752721	3.817885e-34	2.58045702482269e-33	0.971831	0.929577	pos	0.269565	0.0230061	0.240734
Methylocella	Rhodomicrobium	0.95	0.922222	pos	0.733633	1.105561e-31	5.80495665564738e-31	0.915493	0.929577	pos	0.446282	9.585832e-05	0.00646512
Methylosinus	Rhodomicrobium	0.861111	0.922222	pos	0.625306	6.409379e-21	8.37879037997256e-21	0.816901	0.929577	pos	0.323915	0.00585805	0.107534
Neorickettsia	Rhodomicrobium	0.705556	0.922222	pos	0.608345	1.33086e-19	1.44208025014213e-19	0.549296	0.929577	pos	0.303728	0.0100248	0.149465
Oceanicaulis	Rhodomicrobium	0.938889	0.922222	pos	0.604701	2.494396e-19	2.59787071327144e-19	0.957746	0.929577	pos	0.272556	0.0214731	0.232292
Oligotropha	Rhodomicrobium	0.955556	0.922222	pos	0.630582	2.400958e-21	3.34519440643275e-21	0.957746	0.929577	pos	0.128631	0.285037	0.708445
Parvularcula	Rhodomicrobium	0.916667	0.922222	pos	0.621513	1.283325e-20	1.60819658514135e-20	0.957746	0.929577	pos	0.30432	0.00987306	0.148238
Pseudovibrio	Rhodomicrobium	0.95	0.922222	pos	0.799982	2.431061e-41	2.58860461787709e-40	0.929577	0.929577	pos	0.452902	7.314314e-05	0.00526847
Acidiphilium	Rhodopseudomonas	0.966667	0.994444	pos	0.79901	3.570139e-41	3.69819833369565e-40	0.943662	0.985915	pos	0.449686	8.347222e-05	0.00584332
Acinetobacter	Rhodopseudomonas	0.983333	0.994444	neg	0.685144	2.75624e-26	7.3680132398317e-26	1	0.985915	neg	0.369852	0.00160624	0.0467587
Ahrensia	Rhodopseudomonas	0.933333	0.994444	pos	0.705413	2.080452e-28	7.42573316853933e-28	0.943662	0.985915	pos	0.371661	0.00141671	0.0431735
Asticcacaulis	Rhodopseudomonas	0.911111	0.994444	pos	0.640986	3.274471e-22	5.13674216131687e-22	0.929577	0.985915	pos	0.243636	0.0406153	0.326464
Aurantimonas	Rhodopseudomonas	0.944444	0.994444	pos	0.800646	1.866607e-41	1.99873760786517e-40	0.943662	0.985915	pos	0.336279	0.00414054	0.0864578
Bacteroides	Rhodopseudomonas	1	0.994444	neg	0.641315	3.070336e-22	4.85245473963516e-22	1	0.985915	pos	0.0628773	0.601652	0.890398
Beijerinckia	Rhodopseudomonas	0.916667	0.994444	pos	0.777886	9.34011e-38	8.12888112328767e-37	0.887324	0.985915	pos	0.423253	0.000235495	0.012645
Candidatus.Pelagibacter	Rhodopseudomonas	0.994444	0.994444	pos	0.653856	0	0	0.985915	0.985915	pos	0.495339	1.471573e-05	0.00156778
Candidatus.Puniceispirillum	Rhodopseudomonas	0.988889	0.994444	pos	0.721748	2.963804e-30	1.35793519807692e-29	0.971831	0.985915	pos	0.449903	8.273302e-05	0.00580891
Chelativorans	Rhodopseudomonas	0.966667	0.994444	pos	0.80484	3.443347e-42	3.83802303040936e-41	0.985915	0.985915	pos	0.356372	0.00241851	0.061096
Dinoroseobacter	Rhodopseudomonas	0.977778	0.994444	pos	0.660104	6.843458e-24	1.33780830235897e-23	0.985915	0.985915	pos	0.192656	0.107407	0.508552
Fulvimarina	Rhodopseudomonas	0.955556	0.994444	pos	0.82029	4.681583e-45	5.90933589271523e-44	0.943662	0.985915	pos	0.293368	0.0130288	0.174407
Gluconobacter	Rhodopseudomonas	0.911111	0.994444	pos	0.673165	4.124321e-25	9.41025714593301e-25	0.901408	0.985915	pos	0.425988	0.000212354	0.0117126
Granulibacter	Rhodopseudomonas	0.961111	0.994444	pos	0.768632	2.246121e-36	1.77639279087137e-35	0.971831	0.985915	pos	0.336706	0.00409016	0.0857821
Hirschia	Rhodopseudomonas	0.938889	0.994444	pos	0.652855	3.065113e-23	5.45481361157796e-23	0.929577	0.985915	pos	0.0787188	0.514055	0.851652
Hoeflea	Rhodopseudomonas	0.944444	0.994444	pos	0.725283	1.134767e-30	5.38026343781095e-30	0.943662	0.985915	pos	0.366982	0.00164405	0.0475223
Hyphomonas	Rhodopseudomonas	0.961111	0.994444	pos	0.640275	3.761228e-22	5.83786691205212e-22	0.971831	0.985915	pos	0.311656	0.00815244	0.131816
Jannaschia	Rhodopseudomonas	0.972222	0.994444	pos	0.700138	7.719255e-28	2.5410880880829e-27	0.957746	0.985915	pos	0.203025	0.0894912	0.475172
Ketogulonicigenium	Rhodopseudomonas	0.927778	0.994444	pos	0.645478	1.352512e-22	2.25339848951049e-22	0.915493	0.985915	pos	0.350975	0.00269125	0.0656289
Loktanella	Rhodopseudomonas	0.933333	0.994444	pos	0.659811	7.277135e-24	1.41822283333333e-23	0.915493	0.985915	pos	0.192528	0.107712	0.508552
Maricaulis	Rhodopseudomonas	0.972222	0.994444	pos	0.809005	6.167295e-43	7.16760016463415e-42	0.971831	0.985915	pos	0.384795	0.000921828	0.0325235
Maritimibacter	Rhodopseudomonas	0.972222	0.994444	pos	0.676419	2.002844e-25	4.86281465903308e-25	0.957746	0.985915	pos	0.159999	0.182582	0.613215
Methylocella	Rhodopseudomonas	0.95	0.994444	pos	0.789501	1.379442e-39	1.3278870969697e-38	0.915493	0.985915	pos	0.23689	0.0466953	0.349759
Methylosinus	Rhodopseudomonas	0.861111	0.994444	pos	0.690116	8.627982e-27	2.48038215565611e-26	0.816901	0.985915	pos	0.415287	0.000316693	0.0155276
Oceanicaulis	Rhodopseudomonas	0.938889	0.994444	pos	0.608608	1.271416e-19	1.38159572177879e-19	0.957746	0.985915	pos	0.160468	0.181285	0.611379
Octadecabacter	Rhodopseudomonas	0.966667	0.994444	pos	0.60889	1.210641e-19	1.31705579109589e-19	0.971831	0.985915	pos	0.0879954	0.465562	0.826678
Oligotropha	Rhodopseudomonas	0.955556	0.994444	pos	0.779809	4.731687e-38	4.19469554511628e-37	0.957746	0.985915	pos	0.345552	0.00316251	0.0727818
Parvularcula	Rhodopseudomonas	0.916667	0.994444	pos	0.735706	6.117303e-32	3.31631743286119e-31	0.957746	0.985915	pos	0.286998	0.0152388	0.191223
Phenylobacterium	Rhodopseudomonas	0.955556	0.994444	pos	0.682002	5.674345e-26	1.45955486774629e-25	0.957746	0.985915	pos	0.317952	0.00689116	0.118941
Polynucleobacter	Rhodopseudomonas	0.9	0.994444	pos	0.674999	2.747764e-25	6.49781412406948e-25	0.830986	0.985915	pos	0.23613	0.0474251	0.352382
Prevotella	Rhodopseudomonas	0.983333	0.994444	neg	0.619872	1.728035e-20	2.13318310233161e-20	1	0.985915	pos	0.0544266	0.651439	0.91076
Pseudovibrio	Rhodopseudomonas	0.95	0.994444	pos	0.81829	1.139757e-44	1.40153344645161e-43	0.929577	0.985915	pos	0.404058	0.000474964	0.020693
Rhodomicrobium	Rhodopseudomonas	0.922222	0.994444	pos	0.756412	1.201302e-34	8.38711213186813e-34	0.929577	0.985915	pos	0.301727	0.0105528	0.154111
Beijerinckia	Rhodospirillum	0.916667	0.994444	pos	0.614054	4.893192e-20	5.66611418712029e-20	0.887324	0.985915	pos	0.418471	0.000281577	0.0142592
Candidatus.Pelagibacter	Rhodospirillum	0.994444	0.994444	pos	0.663646	0	0	0.985915	0.985915	pos	0.554695	8.302177e-07	0.000157898
Candidatus.Puniceispirillum	Rhodospirillum	0.988889	0.994444	pos	0.600096	5.454711e-19	5.46618252681388e-19	0.971831	0.985915	pos	0.539894	1.179965e-06	0.0002114
Chelativorans	Rhodospirillum	0.966667	0.994444	pos	0.657958	1.071328e-23	2.04399516316316e-23	0.985915	0.985915	pos	0.401677	0.000571394	0.0234743
Granulibacter	Rhodospirillum	0.961111	0.994444	pos	0.657642	1.144056e-23	2.16756534393638e-23	0.971831	0.985915	pos	0.41434	0.000327888	0.0159456
Hoeflea	Rhodospirillum	0.944444	0.994444	pos	0.661267	5.359591e-24	1.06743787314525e-23	0.943662	0.985915	pos	0.431978	0.000168795	0.00983528
Methylocella	Rhodospirillum	0.95	0.994444	pos	0.62956	2.908078e-21	3.9933693573487e-21	0.915493	0.985915	pos	0.242039	0.0419913	0.332156
Methylosinus	Rhodospirillum	0.861111	0.994444	pos	0.663122	3.620939e-24	7.38919671734475e-24	0.816901	0.985915	pos	0.543243	9.828627e-07	0.000182079
Nitrobacter	Rhodospirillum	0.994444	0.994444	pos	0.639522	0	0	0.985915	0.985915	pos	0.410262	0.000425104	0.0191035
Oligotropha	Rhodospirillum	0.955556	0.994444	pos	0.6407	3.462413e-22	5.4011891096563e-22	0.957746	0.985915	pos	0.320769	0.00638469	0.113387
Parvularcula	Rhodospirillum	0.916667	0.994444	pos	0.626615	5.031855e-21	6.69275340544313e-21	0.957746	0.985915	pos	0.310071	0.00850019	0.135307
Pseudovibrio	Rhodospirillum	0.95	0.994444	pos	0.678643	1.215884e-25	3.02147966623207e-25	0.929577	0.985915	pos	0.547074	7.955246e-07	0.000152536
Rhodomicrobium	Rhodospirillum	0.922222	0.994444	pos	0.646568	1.088893e-22	1.83503983908046e-22	0.929577	0.985915	pos	0.382492	0.000995262	0.0341888
Rhodopseudomonas	Rhodospirillum	0.994444	0.994444	pos	0.711403	0	0	0.985915	0.985915	pos	0.709457	0	0
Agrobacterium	Rickettsia	0.994444	0.988889	pos	0.659341	8.0297e-24	1.55851407331976e-23	0.985915	1	pos	0.473642	3.756325e-05	0.00320214
Bacillus	Rickettsia	1	0.988889	pos	0.619473	1.857213e-20	2.27642956784566e-20	1	1	neg	0.347954	0.0030969	0.0717901
Brucella	Rickettsia	1	0.988889	pos	0.735162	7.14864e-32	3.82733366292135e-31	1	1	pos	0.583266	1.736239e-07	4.52513313057098e-05
Burkholderia	Rickettsia	1	0.988889	pos	0.615862	3.549167e-20	4.19647165136476e-20	1	1	neg	0.469081	4.541081e-05	0.00368382
Campylobacter	Rickettsia	0.966667	0.988889	pos	0.626821	4.843994e-21	6.45188858420685e-21	0.957746	1	pos	0.453503	7.1349e-05	0.00516643
Clostridium	Rickettsia	0.994444	0.988889	pos	0.672742	4.526712e-25	1.02713250857143e-24	0.985915	1	pos	0.0284038	0.813742	0.955136
Methylobacterium	Rickettsia	1	0.988889	pos	0.608269	1.348502e-19	1.45705488208617e-19	1	1	pos	0.229913	0.0539464	0.375885
Croceibacter	Riemerella	0.972222	0.877778	pos	0.675834	2.281962e-25	5.46409493969849e-25	0.971831	0.830986	pos	0.616509	1.040014e-08	4.15116834058323e-06
Cytophaga	Riemerella	0.944444	0.877778	pos	0.626112	5.522962e-21	7.29000385872576e-21	0.929577	0.830986	pos	0.51603	4.106012e-06	0.000585601
Dokdonia	Riemerella	0.988889	0.877778	pos	0.670898	6.78391e-25	1.51229619415205e-24	0.985915	0.830986	pos	0.572854	1.78559e-07	4.62870805173502e-05
Kordia	Riemerella	0.966667	0.877778	pos	0.698344	1.197858e-27	3.86969042033898e-27	0.971831	0.830986	pos	0.682361	5.63736e-11	3.55397136046065e-08
Leeuwenhoekiella	Riemerella	0.972222	0.877778	pos	0.619515	1.843224e-20	2.26073677220077e-20	0.971831	0.830986	pos	0.561522	3.497566e-07	7.91725045161957e-05
Maribacter	Riemerella	0.955556	0.877778	pos	0.654939	2.000449e-23	3.6703744773821e-23	0.971831	0.830986	pos	0.603054	2.614587e-08	9.36504005545256e-06
Marivirga	Riemerella	0.938889	0.877778	pos	0.606109	1.958704e-19	2.07635696551724e-19	0.901408	0.830986	pos	0.345777	0.0031415	0.0724913
Polaribacter	Riemerella	0.994444	0.877778	pos	0.657402	1.202454e-23	2.2759457040715e-23	0.985915	0.830986	pos	0.752578	3.804677e-14	4.84366350401163e-11
Psychroflexus	Riemerella	0.966667	0.877778	pos	0.680023	8.901709e-26	2.24723938463576e-25	0.971831	0.830986	pos	0.551866	6.083247e-07	0.000122057
Algoriphagus	Robiginitalea	0.955556	0.983333	pos	0.748655	1.332667e-33	8.41080563576159e-33	0.971831	0.985915	pos	0.311622	0.00815966	0.131887
Blattabacterium	Robiginitalea	0.761111	0.983333	pos	0.652517	3.283941e-23	5.81709251486989e-23	0.605634	0.985915	pos	0.399487	0.000557933	0.0231063
Candidatus.Sulcia	Robiginitalea	0.655556	0.983333	pos	0.620693	1.489476e-20	1.85309481462141e-20	0.394366	0.985915	pos	0.44336	0.000107824	0.00708308
Chitinophaga	Robiginitalea	0.972222	0.983333	pos	0.711625	4.276588e-29	1.69463133638254e-28	0.943662	0.985915	pos	0.54966	6.886283e-07	0.000135764
Chryseobacterium	Robiginitalea	0.894444	0.983333	pos	0.685657	2.44739e-26	6.60725968838527e-26	0.830986	0.985915	pos	0.606789	2.033001e-08	7.51969981368243e-06
Croceibacter	Robiginitalea	0.972222	0.983333	pos	0.875766	3.413779e-58	6.63945181020408e-57	0.971831	0.985915	pos	0.784329	5.948198e-16	8.31368244293617e-13
Cytophaga	Robiginitalea	0.944444	0.983333	pos	0.780786	3.339739e-38	3.0168448028436e-37	0.929577	0.985915	pos	0.675298	1.051588e-10	6.43201744022346e-08
Dinoroseobacter	Robiginitalea	0.977778	0.983333	pos	0.622882	1.000052e-20	1.2697195885486e-20	0.985915	0.985915	pos	0.435916	0.00016789	0.00979829
Dokdonia	Robiginitalea	0.988889	0.983333	pos	0.832342	1.722575e-47	2.4320207037037e-46	0.985915	0.985915	pos	0.713145	0	0
Dyadobacter	Robiginitalea	0.955556	0.983333	pos	0.766435	4.676967e-36	3.60902797651822e-35	0.943662	0.985915	pos	0.535206	1.518955e-06	0.00025877
Jannaschia	Robiginitalea	0.972222	0.983333	pos	0.619089	1.990649e-20	2.42749647728727e-20	0.957746	0.985915	pos	0.419598	0.000270021	0.0138534
Kordia	Robiginitalea	0.966667	0.983333	pos	0.894461	4.01672e-64	8.60209923595506e-63	0.971831	0.985915	pos	0.806663	2.047043e-17	3.02865544398649e-14
Leadbetterella	Robiginitalea	0.894444	0.983333	pos	0.63297	1.529931e-21	2.19087038767844e-21	0.816901	0.985915	pos	0.484546	1.853745e-05	0.00187288
Leeuwenhoekiella	Robiginitalea	0.972222	0.983333	pos	0.804099	4.656063e-42	5.1002621137931e-41	0.971831	0.985915	pos	0.719238	1.604328e-12	1.70533836e-09
Loktanella	Robiginitalea	0.933333	0.983333	pos	0.641458	2.985876e-22	4.72681034551495e-22	0.915493	0.985915	pos	0.558078	4.269452e-07	9.36755415270541e-05
Maribacter	Robiginitalea	0.955556	0.983333	pos	0.855041	1.195164e-52	1.96377808965517e-51	0.971831	0.985915	pos	0.744574	9.844499e-14	1.17154888371196e-10
Marivirga	Robiginitalea	0.938889	0.983333	pos	0.805572	2.552095e-42	2.87827992307692e-41	0.901408	0.985915	pos	0.573173	1.751451e-07	4.55120916301424e-05
Mucilaginibacter	Robiginitalea	0.916667	0.983333	pos	0.704325	2.7328e-28	9.64577185185185e-28	0.887324	0.985915	pos	0.549314	7.0212e-07	0.00013768
Octadecabacter	Robiginitalea	0.966667	0.983333	pos	0.62254	1.064398e-20	1.34442848774023e-20	0.971831	0.985915	pos	0.491839	1.32474e-05	0.00144564
Paludibacter	Robiginitalea	0.805556	0.983333	pos	0.675177	2.641164e-25	6.26126689552239e-25	0.704225	0.985915	pos	0.475461	2.787693e-05	0.00257128
Polaribacter	Robiginitalea	0.994444	0.983333	pos	0.80571	2.41252e-42	2.73706138095238e-41	0.985915	0.985915	pos	0.820657	0	0
Psychroflexus	Robiginitalea	0.966667	0.983333	pos	0.819088	8.001816e-45	9.9035462961039e-44	0.971831	0.985915	pos	0.742126	1.307471e-13	1.52285598335106e-10
Riemerella	Robiginitalea	0.877778	0.983333	pos	0.715205	1.686146e-29	7.11016432743363e-29	0.830986	0.985915	pos	0.585544	8.156507e-08	2.38349244366993e-05
Acidiphilium	Roseibium	0.966667	0.966667	pos	0.623752	8.52799e-21	1.09162853861652e-20	0.943662	0.971831	pos	0.34496	0.00321814	0.0736699
Ahrensia	Roseibium	0.933333	0.966667	pos	0.744274	4.990502e-33	3.00059836340694e-32	0.943662	0.971831	pos	0.229825	0.0538476	0.375596
Aurantimonas	Roseibium	0.944444	0.966667	pos	0.66331	3.478959e-24	7.12999554193548e-24	0.943662	0.971831	pos	0.284072	0.0163578	0.199242
Beijerinckia	Roseibium	0.916667	0.966667	pos	0.645317	1.396412e-22	2.32450766113537e-22	0.887324	0.971831	pos	0.238374	0.0452974	0.344705
Candidatus.Puniceispirillum	Roseibium	0.988889	0.966667	pos	0.693089	4.259323e-27	1.2684796309375e-26	0.971831	0.971831	pos	0.346644	0.00306206	0.071264
Chelativorans	Roseibium	0.966667	0.966667	pos	0.648689	7.12427e-23	1.21783485381166e-22	0.985915	0.971831	neg	0.027683	0.818741	0.957599
Dinoroseobacter	Roseibium	0.977778	0.966667	pos	0.696087	2.072255e-27	6.44325942903752e-27	0.985915	0.971831	pos	0.268748	0.0234402	0.243233
Fulvimarina	Roseibium	0.955556	0.966667	pos	0.738502	2.729213e-32	1.53901774497041e-31	0.943662	0.971831	pos	0.449228	8.504603e-05	0.00592571
Gluconobacter	Roseibium	0.911111	0.966667	pos	0.620925	1.428074e-20	1.78135408638743e-20	0.901408	0.971831	pos	0.241883	0.0421284	0.332675
Granulibacter	Roseibium	0.961111	0.966667	pos	0.674457	3.099408e-25	7.27521138916256e-25	0.971831	0.971831	pos	0.160952	0.179956	0.609276
Hoeflea	Roseibium	0.944444	0.966667	pos	0.711373	4.563675e-29	1.80463994813278e-28	0.943662	0.971831	pos	0.256186	0.031047	0.283438
Jannaschia	Roseibium	0.972222	0.966667	pos	0.796127	1.103337e-40	1.13062382903226e-39	0.957746	0.971831	pos	0.468112	3.845627e-05	0.00325461
Ketogulonicigenium	Roseibium	0.927778	0.966667	pos	0.719923	4.837315e-30	2.16430103051643e-29	0.915493	0.971831	pos	0.137634	0.252377	0.682209
Loktanella	Roseibium	0.933333	0.966667	pos	0.680716	7.605754e-26	1.93804373315508e-25	0.915493	0.971831	pos	0.18541	0.121619	0.531313
Maricaulis	Roseibium	0.972222	0.966667	pos	0.73594	5.720418e-32	3.11517620228571e-31	0.971831	0.971831	neg	0.0688056	0.568574	0.876609
Maritimibacter	Roseibium	0.972222	0.966667	pos	0.748323	1.474172e-33	9.2426705e-33	0.957746	0.971831	pos	0.177237	0.139232	0.558636
Methylocella	Roseibium	0.95	0.966667	pos	0.726828	7.421797e-31	3.59947712010178e-30	0.915493	0.971831	pos	0.281239	0.0175079	0.206974
Methylococcus	Roseibium	0.95	0.966667	pos	0.603581	3.020622e-19	3.11374014710654e-19	0.971831	0.971831	pos	0.232893	0.0506392	0.364195
Octadecabacter	Roseibium	0.966667	0.966667	pos	0.676199	2.103418e-25	5.08126071989861e-25	0.971831	0.971831	pos	0.26984	0.0228611	0.239906
Oligotropha	Roseibium	0.955556	0.966667	pos	0.697018	1.653896e-27	5.2277376053068e-27	0.957746	0.971831	pos	0.237736	0.045894	0.34717
Phenylobacterium	Roseibium	0.955556	0.966667	pos	0.610825	8.638156e-20	9.60579074445741e-20	0.957746	0.971831	neg	0.103744	0.389256	0.782813
Pseudovibrio	Roseibium	0.95	0.966667	pos	0.753435	3.057096e-34	2.07360319430605e-33	0.929577	0.971831	pos	0.167132	0.163589	0.589433
Rhodobacter	Roseibium	1	0.966667	pos	0.638225	5.597748e-22	8.50144038884462e-22	1	0.971831	pos	0.213449	0.0738907	0.438276
Rhodomicrobium	Roseibium	0.922222	0.966667	pos	0.660507	6.288673e-24	1.23824491095041e-23	0.929577	0.971831	neg	0.0403995	0.737998	0.937253
Rhodopseudomonas	Roseibium	0.994444	0.966667	pos	0.764045	1.029248e-35	7.69312426666667e-35	0.985915	0.971831	pos	0.352384	0.00257958	0.0637669
Ktedonobacter	Roseiflexus	0.861111	0.961111	pos	0.615502	3.783794e-20	4.45729997775031e-20	0.760563	0.971831	pos	0.508306	6.026762e-06	0.000793779
Acinetobacter	Roseobacter	0.983333	1	pos	0.813813	8.028546e-44	9.5640054225e-43	1	1	pos	0.0479209	0.690854	0.924956
Actinobacillus	Roseobacter	0.933333	1	pos	0.657906	1.082951e-23	2.064104606e-23	0.971831	1	neg	0.0074615	0.950757	0.985387
Bacillus	Roseobacter	1	1	pos	0.762995	0	0	1	1	neg	0.0748491	0.534179	0.859027
Bacteroides	Roseobacter	1	1	pos	0.849501	2.596534e-51	4.05655229836066e-50	1	1	pos	0.417404	0.000330487	0.0160441
Bartonella	Roseobacter	0.944444	1	pos	0.66482	2.522802e-24	5.26666003504929e-24	0.915493	1	pos	0.107745	0.371127	0.772622
Bradyrhizobium	Roseobacter	0.988889	1	pos	0.654392	2.238206e-23	4.07841360994264e-23	1	1	neg	0.0037894	0.975025	0.991553
Burkholderia	Roseobacter	1	1	pos	0.748179	0	0	1	1	pos	0.0330315	0.784066	0.949661
Campylobacter	Roseobacter	0.966667	1	pos	0.65883	8.933871e-24	1.71652803689516e-23	0.957746	1	pos	0.275998	0.019818	0.22212
Chelativorans	Roseobacter	0.966667	1	neg	0.614969	4.159952e-20	4.86135408461067e-20	0.985915	1	pos	0.0795439	0.508785	0.847953
Chlorobium	Roseobacter	0.972222	1	pos	0.600125	5.427628e-19	5.44476787789474e-19	1	1	neg	0.129745	0.280159	0.706884
Clostridium	Roseobacter	0.994444	1	pos	0.702713	0	0	0.985915	1	neg	0.0132461	0.912579	0.97263
Corynebacterium	Roseobacter	0.961111	1	pos	0.693564	3.802335e-27	1.13950479716981e-26	1	1	pos	0.0966465	0.421813	0.80195
Erythrobacter	Roseobacter	0.972222	1	pos	0.64707	9.852602e-23	1.66776726571936e-22	0.985915	1	neg	0.1556	0.194621	0.624631
Escherichia	Roseobacter	0.972222	1	pos	0.65522	1.887781e-23	3.48992297381183e-23	1	1	neg	0.0825285	0.492972	0.841466
Flavobacterium	Roseobacter	0.988889	1	pos	0.643933	1.836401e-22	3.01220336144578e-22	0.985915	1	pos	0.610094	3.385895e-08	1.17559634484672e-05
Frankia	Roseobacter	0.977778	1	pos	0.654146	2.353854e-23	4.26468224714829e-23	0.971831	1	pos	0.00975863	0.935625	0.978809
Geobacillus	Roseobacter	0.95	1	pos	0.643451	2.01956e-22	3.29279842600513e-22	0.971831	1	neg	0.0868384	0.471471	0.828983
Geobacter	Roseobacter	0.977778	1	pos	0.663326	3.467213e-24	7.11357155866523e-24	0.985915	1	neg	0.133702	0.265654	0.691544
Granulibacter	Roseobacter	0.961111	1	neg	0.613695	5.213929e-20	6.01089366021765e-20	0.971831	1	neg	0.154042	0.199627	0.631567
Haemophilus	Roseobacter	0.961111	1	pos	0.632725	1.602711e-21	2.28650236976048e-21	0.985915	1	neg	0.110932	0.356239	0.761631
Lactobacillus	Roseobacter	0.944444	1	pos	0.629628	2.871249e-21	3.95100598268398e-21	0.943662	1	pos	0.230703	0.0529124	0.372125
Marinobacter	Roseobacter	0.983333	1	pos	0.801078	1.571469e-41	1.70182949659091e-40	0.985915	1	pos	0.116465	0.33264	0.743857
Methylobacterium	Roseobacter	1	1	pos	0.629694	0	0	1	1	pos	0.0181422	0.880433	0.969126
Methylocella	Roseobacter	0.95	1	neg	0.609087	1.169847e-19	1.27558831922197e-19	0.915493	1	pos	0.128089	0.287087	0.709306
Mycobacterium	Roseobacter	0.988889	1	pos	0.724316	1.477641e-30	6.90290133823529e-30	0.985915	1	pos	0.123977	0.302232	0.72411
Neisseria	Roseobacter	0.95	1	pos	0.694523	3.021187e-27	9.1693987611465e-27	0.929577	1	pos	0.266242	0.0248165	0.251163
Nitrosococcus	Roseobacter	0.966667	1	pos	0.710319	5.985643e-29	2.33783515532787e-28	1	1	pos	0.0928236	0.440473	0.811412
Oligotropha	Roseobacter	0.955556	1	neg	0.602156	3.849957e-19	3.92827518308351e-19	0.957746	1	pos	0.0208927	0.862699	0.964642
Paenibacillus	Roseobacter	0.944444	1	pos	0.623725	8.571313e-21	1.09643775691275e-20	0.943662	1	neg	0.0196194	0.870993	0.966948
Paracoccus	Roseobacter	0.983333	1	pos	0.629249	3.082432e-21	4.21759898923187e-21	1	1	pos	0.433669	0.000182629	0.010445
Photobacterium	Roseobacter	0.977778	1	pos	0.719193	5.878947e-30	2.58186013410138e-29	0.985915	1	neg	0.147887	0.217883	0.6498
Prevotella	Roseobacter	0.983333	1	pos	0.806891	1.483994e-42	1.70391118313253e-41	1	1	pos	0.452817	8.757824e-05	0.00605462
Pseudoalteromonas	Roseobacter	0.988889	1	pos	0.714067	2.270527e-29	9.34692108423326e-29	0.985915	1	neg	0.238397	0.045504	0.34562
Pseudomonas	Roseobacter	1	1	pos	0.774514	0	0	1	1	pos	0.0623742	0.604568	0.892231
Psychromonas	Roseobacter	0.944444	1	pos	0.635349	9.727716e-22	1.42733076951501e-21	0.957746	1	neg	0.130219	0.279081	0.705887
Ralstonia	Roseobacter	0.972222	1	pos	0.643977	1.820275e-22	2.99090012931034e-22	0.985915	1	pos	0.116398	0.33292	0.74414
Rhizobium	Roseobacter	0.988889	1	pos	0.716517	1.194492e-29	5.08192355357143e-29	0.985915	1	pos	0.125386	0.29674	0.719416
Rhodomicrobium	Roseobacter	0.922222	1	neg	0.633458	1.39476e-21	2.00332521477016e-21	0.929577	1	pos	0.012544	0.917308	0.973295
Rhodopseudomonas	Roseobacter	0.994444	1	neg	0.641769	0	0	0.985915	1	pos	0.155131	0.195983	0.626531
Acidiphilium	Roseomonas	0.966667	0.911111	pos	0.677921	1.430425e-25	3.52702464424321e-25	0.943662	0.859155	pos	0.224533	0.0597707	0.395424
Aurantimonas	Roseomonas	0.944444	0.911111	pos	0.674588	3.010313e-25	7.07479232799014e-25	0.943662	0.859155	pos	0.167768	0.161969	0.587029
Beijerinckia	Roseomonas	0.916667	0.911111	pos	0.66224	4.364402e-24	8.80269863703704e-24	0.887324	0.859155	pos	0.32615	0.00550744	0.103374
Candidatus.Puniceispirillum	Roseomonas	0.988889	0.911111	pos	0.64395	1.830266e-22	3.00472609474591e-22	0.971831	0.859155	pos	0.360772	0.00199639	0.053931
Chelativorans	Roseomonas	0.966667	0.911111	pos	0.681792	5.952672e-26	1.52497215483871e-25	0.985915	0.859155	pos	0.0750032	0.534174	0.859027
Fulvimarina	Roseomonas	0.955556	0.911111	pos	0.624464	7.483776e-21	9.67712147625509e-21	0.943662	0.859155	pos	0.162512	0.175715	0.603752
Gluconobacter	Roseomonas	0.911111	0.911111	pos	0.658899	8.80589e-24	1.6953561959596e-23	0.901408	0.859155	pos	0.390109	0.000770777	0.0288048
Granulibacter	Roseomonas	0.961111	0.911111	pos	0.651663	3.907184e-23	6.88271044731978e-23	0.971831	0.859155	pos	0.151494	0.207257	0.637039
Hoeflea	Roseomonas	0.944444	0.911111	pos	0.651922	3.706571e-23	6.54141141296296e-23	0.943662	0.859155	pos	0.217657	0.0682453	0.421947
Maricaulis	Roseomonas	0.972222	0.911111	pos	0.610531	9.094651e-20	1.00781423290698e-19	0.971831	0.859155	pos	0.268718	0.0234565	0.243279
Methylocella	Roseomonas	0.95	0.911111	pos	0.670096	8.082902e-25	1.7893160524971e-24	0.915493	0.859155	pos	0.262504	0.0269956	0.262738
Methylosinus	Roseomonas	0.861111	0.911111	pos	0.643276	2.090041e-22	3.39320114650767e-22	0.816901	0.859155	pos	0.377496	0.00117304	0.0382045
Octadecabacter	Roseomonas	0.966667	0.911111	pos	0.603787	2.916425e-19	3.01121671180932e-19	0.971831	0.859155	pos	0.370721	0.00145997	0.0440594
Oligotropha	Roseomonas	0.955556	0.911111	pos	0.686926	1.822346e-26	5.00488685302594e-26	0.957746	0.859155	pos	0.0598434	0.620075	0.899516
Parvularcula	Roseomonas	0.916667	0.911111	pos	0.644513	1.637426e-22	2.69976985813149e-22	0.957746	0.859155	pos	0.211937	0.0760085	0.444145
Pseudovibrio	Roseomonas	0.95	0.911111	pos	0.658704	9.171619e-24	1.76043361671702e-23	0.929577	0.859155	pos	0.31726	0.00702086	0.120363
Rhodopseudomonas	Roseomonas	0.994444	0.911111	pos	0.745958	3.013834e-33	1.84114346282051e-32	0.985915	0.859155	pos	0.475843	2.740906e-05	0.00253637
Rhodospirillum	Roseomonas	0.994444	0.911111	pos	0.639851	4.084778e-22	6.29392632821342e-22	0.985915	0.859155	pos	0.498191	9.823532e-06	0.00115773
Roseibium	Roseomonas	0.966667	0.911111	pos	0.667542	1.406398e-24	3.02892043841808e-24	0.971831	0.859155	pos	0.324714	0.00573043	0.106046
Oceanicola	Roseovarius	0.988889	0.994444	pos	0.657872	1.090801e-23	2.07698971628372e-23	1	0.985915	pos	0.664856	0	0
Roseobacter	Roseovarius	1	0.994444	pos	0.645903	0	0	1	0.985915	pos	0.802817	0	0
Renibacterium	Rothia	0.672222	0.694444	pos	0.607085	1.655121e-19	1.7712861459854e-19	0.507042	0.549296	pos	0.652532	7.017604e-10	3.76628614676471e-07
Acidothermus	Rubrobacter	0.811111	0.866667	pos	0.615766	3.610617e-20	4.26648233230006e-20	0.71831	0.802817	pos	0.447359	9.176686e-05	0.00627277
Candidatus.Solibacter	Rubrobacter	0.9	0.866667	pos	0.697384	1.513284e-27	4.81522421368948e-27	0.859155	0.802817	pos	0.570632	2.041263e-07	5.20545837472826e-05
Chloroherpeton	Rubrobacter	0.872222	0.866667	pos	0.645849	1.256635e-22	2.10100553508772e-22	0.830986	0.802817	pos	0.479741	2.303495e-05	0.00221162
Conexibacter	Rubrobacter	0.8	0.866667	pos	0.702946	3.855071e-28	1.33111690688406e-27	0.661972	0.802817	pos	0.502144	8.131101e-06	0.00100026
Oscillochloris	Rubrobacter	0.744444	0.866667	pos	0.610122	9.767708e-20	1.07738723657407e-19	0.549296	0.802817	pos	0.326845	0.00540238	0.10217
Acinetobacter	Ruegeria	0.983333	1	pos	0.684329	3.32682e-26	8.79461708737864e-26	1	1	pos	0.164856	0.16914	0.597942
Agrobacterium	Ruegeria	0.994444	1	pos	0.608292	0	0	0.985915	1	pos	0.0687793	0.567916	0.876609
Bacillus	Ruegeria	1	1	pos	0.674146	0	0	1	1	neg	0.112374	0.349991	0.759982
Bacteroides	Ruegeria	1	1	pos	0.779593	5.107972e-38	4.50731232962963e-37	1	1	pos	0.532629	2.555543e-06	0.000403032
Burkholderia	Ruegeria	1	1	pos	0.733325	0	0	1	1	pos	0.054896	0.64863	0.909186
Clostridium	Ruegeria	0.994444	1	pos	0.67826	0	0	0.985915	1	neg	0.157042	0.190478	0.619608
Erythrobacter	Ruegeria	0.972222	1	pos	0.614628	4.419681e-20	5.15223974678899e-20	0.985915	1	neg	0.232864	0.0508749	0.364999
Haemophilus	Ruegeria	0.961111	1	pos	0.632846	1.566279e-21	2.24123706756757e-21	0.985915	1	neg	0.00573441	0.962157	0.986149
Marinobacter	Ruegeria	0.983333	1	pos	0.710093	6.341715e-29	2.45437437079108e-28	0.985915	1	pos	0.0753186	0.531611	0.857232
Methylobacterium	Ruegeria	1	1	pos	0.615585	0	0	1	1	pos	0.00325285	0.978576	0.993
Mycobacterium	Ruegeria	0.988889	1	pos	0.609558	1.077753e-19	1.18193165592635e-19	0.985915	1	pos	0.168008	0.16105	0.585785
Nitrosococcus	Ruegeria	0.966667	1	pos	0.631853	1.889987e-21	2.66838164592593e-21	1	1	pos	0.190275	0.111885	0.51667
Oceanicola	Ruegeria	0.988889	1	pos	0.642982	2.214586e-22	3.58015344868533e-22	1	1	pos	0.740644	0	0
Parabacteroides	Ruegeria	0.966667	1	pos	0.604841	2.435097e-19	2.54317527780822e-19	0.971831	1	pos	0.399115	0.000565238	0.0233213
Photobacterium	Ruegeria	0.977778	1	pos	0.683639	3.899818e-26	1.01822645315068e-25	0.985915	1	neg	0.195842	0.101636	0.499368
Prevotella	Ruegeria	0.983333	1	pos	0.710089	6.348408e-29	2.45437437079108e-28	1	1	pos	0.505734	9.199017e-06	0.00109553
Pseudoalteromonas	Ruegeria	0.988889	1	pos	0.67853	1.247397e-25	3.0957534921875e-25	0.985915	1	neg	0.281087	0.0178531	0.209317
Pseudomonas	Ruegeria	1	1	pos	0.722043	0	0	1	1	pos	0.10104	0.400944	0.791671
Rickettsia	Ruegeria	0.988889	1	pos	0.621513	1.283351e-20	1.60819658514135e-20	1	1	pos	0.0795104	0.508964	0.848108
Roseobacter	Ruegeria	1	1	pos	0.810163	0	0	1	1	pos	0.834775	0	0
Roseovarius	Ruegeria	0.994444	1	pos	0.782176	0	0	0.985915	1	pos	0.661536	0	0
Geobacillus	Ruminococcus	0.95	0.905556	pos	0.611727	7.375057e-20	8.28824212382075e-20	0.971831	0.901408	pos	0.433507	0.000159077	0.00941097
Catenulispora	Saccharomonospora	0.844444	0.85	pos	0.641516	2.952517e-22	4.6817782046589e-22	0.732394	0.788732	pos	0.561191	3.565663e-07	8.02164274428082e-05
Nakamurella	Saccharomonospora	0.794444	0.85	pos	0.65318	2.86861e-23	5.1194481835206e-23	0.676056	0.788732	pos	0.551699	6.140813e-07	0.00012313
Nocardioides	Saccharomonospora	0.877778	0.85	pos	0.637275	6.722646e-22	1.01051760851735e-21	0.830986	0.788732	pos	0.535996	1.456032e-06	0.00025065
Bermanella	Saccharophagus	0.933333	0.955556	pos	0.629978	2.689059e-21	3.7248157369186e-21	0.957746	0.985915	pos	0.448841	8.639861e-05	0.00599072
Cellvibrio	Saccharophagus	0.95	0.955556	pos	0.712277	3.61384e-29	1.45010085052632e-28	0.971831	0.985915	pos	0.664096	2.731232e-10	1.5683335779021e-07
Congregibacter	Saccharophagus	0.95	0.955556	pos	0.701106	6.080531e-28	2.01907527630662e-27	0.971831	0.985915	pos	0.545695	8.586762e-07	0.000162651
Hahella	Saccharophagus	0.966667	0.955556	pos	0.694664	2.920455e-27	8.89199238019169e-27	0.985915	0.985915	pos	0.650335	0	0
Kangiella	Saccharophagus	0.938889	0.955556	pos	0.685854	2.338421e-26	6.34001483072546e-26	0.943662	0.985915	pos	0.577262	1.36528e-07	3.69994259405941e-05
Neptuniibacter	Saccharophagus	0.944444	0.955556	pos	0.633734	1.323518e-21	1.90674626455026e-21	0.943662	0.985915	pos	0.421011	0.000256156	0.0133933
Reinekea	Saccharophagus	0.955556	0.955556	pos	0.669697	8.816968e-25	1.94503946851852e-24	0.985915	0.985915	pos	0.545741	1.321024e-06	0.000232155
Ahrensia	Sagittula	0.933333	0.988889	pos	0.616623	3.098524e-20	3.6819119351621e-20	0.943662	0.971831	pos	0.354233	0.00243933	0.0614896
Candidatus.Puniceispirillum	Sagittula	0.988889	0.988889	pos	0.657357	1.213866e-23	2.29526646428571e-23	0.971831	0.971831	pos	0.310627	0.00837665	0.134075
Citreicella	Sagittula	0.961111	0.988889	pos	0.755179	1.771663e-34	1.21467254604317e-33	0.957746	0.971831	pos	0.609767	1.659483e-08	6.30133513023121e-06
Dinoroseobacter	Sagittula	0.977778	0.988889	pos	0.796065	1.130552e-40	1.15231663743316e-39	0.985915	0.971831	pos	0.634697	2.785195e-09	1.30687317675e-06
Hoeflea	Sagittula	0.944444	0.988889	pos	0.673948	3.468859e-25	8.01411545939394e-25	0.943662	0.971831	pos	0.383092	0.00097564	0.0337497
Jannaschia	Sagittula	0.972222	0.988889	pos	0.770469	1.208979e-36	9.88975954506438e-36	0.957746	0.971831	pos	0.584817	8.538816e-08	2.47102802579736e-05
Ketogulonicigenium	Sagittula	0.927778	0.988889	pos	0.738492	2.737507e-32	1.53914110383481e-31	0.915493	0.971831	pos	0.463109	4.767089e-05	0.00381803
Labrenzia	Sagittula	1	0.988889	pos	0.639408	4.451492e-22	6.82037279099678e-22	1	0.971831	pos	0.471214	3.360201e-05	0.00295118
Loktanella	Sagittula	0.933333	0.988889	pos	0.761861	2.098647e-35	1.53846968538462e-34	0.915493	0.971831	pos	0.531188	1.880324e-06	0.000310821
Maritimibacter	Sagittula	0.972222	0.988889	pos	0.825015	5.47462e-46	7.14700391780822e-45	0.957746	0.971831	pos	0.578696	1.250007e-07	3.43861850238693e-05
Oceanibulbus	Sagittula	0.944444	0.988889	pos	0.74966	9.80475e-34	6.27109177852349e-33	0.915493	0.971831	pos	0.448844	8.638783e-05	0.00599072
Octadecabacter	Sagittula	0.966667	0.988889	pos	0.751471	5.621339e-34	3.7073606e-33	0.971831	0.971831	pos	0.478143	2.474274e-05	0.00234002
Pelagibaca	Sagittula	0.933333	0.988889	pos	0.675068	2.706148e-25	6.4073516621118e-25	0.915493	0.971831	pos	0.569253	2.216946e-07	5.51289472028127e-05
Phaeobacter	Sagittula	0.961111	0.988889	pos	0.716101	1.332946e-29	5.64576683555556e-29	0.943662	0.971831	pos	0.622702	6.704103e-09	2.80738271000637e-06
Rhodobacter	Sagittula	1	0.988889	pos	0.800678	1.842786e-41	1.98437859661017e-40	1	0.971831	pos	0.699536	1.148637e-11	9.74872263139535e-09
Roseibium	Sagittula	0.966667	0.988889	pos	0.63223	1.75995e-21	2.49032271714922e-21	0.971831	0.971831	pos	0.210491	0.0780779	0.449571
Candidatus.Solibacter	Salinibacter	0.9	0.938889	pos	0.654289	2.286101e-23	4.16170821967526e-23	0.859155	0.901408	pos	0.503146	7.747777e-06	0.000961719
Acidimicrobium	Salinispora	0.816667	0.894444	pos	0.628999	3.229784e-21	4.40341080400572e-21	0.746479	0.859155	pos	0.511311	5.196552e-06	0.000708818
Colwellia	Salmonella	0.95	0.961111	pos	0.625644	6.022015e-21	7.89546735900963e-21	0.971831	0.971831	pos	0.740128	1.644254e-13	1.90835140484099e-10
Ferrimonas	Salmonella	0.933333	0.961111	pos	0.610663	8.886453e-20	9.86463565404776e-20	0.943662	0.971831	pos	0.746212	8.126757e-14	9.81350724424632e-11
Acidothermus	Sanguibacter	0.811111	0.727778	pos	0.625046	6.72389e-21	8.76589216142271e-21	0.71831	0.577465	pos	0.522313	2.984036e-06	0.000455024
Rhodomicrobium	Sebaldella	0.922222	0.705556	pos	0.602829	3.433475e-19	3.51838889784946e-19	0.929577	0.549296	pos	0.102451	0.395223	0.788018
Acidovorax	Serratia	0.95	0.938889	pos	0.600504	5.091762e-19	5.13215143945003e-19	0.971831	0.943662	pos	0.520311	3.305776e-06	0.000493994
Acinetobacter	Serratia	0.983333	0.938889	pos	0.661377	5.237255e-24	1.04416401987448e-23	1	0.943662	pos	0.300461	0.0108992	0.157124
Actinobacillus	Serratia	0.933333	0.938889	pos	0.755876	1.422656e-34	9.82457368115942e-34	0.971831	0.943662	pos	0.50994	5.561184e-06	0.000745855
Anaeromyxobacter	Serratia	0.95	0.938889	pos	0.6944	3.111823e-27	9.42946683306836e-27	0.957746	0.943662	pos	0.326329	0.00548019	0.103087
Burkholderia	Serratia	1	0.938889	pos	0.611002	8.375577e-20	9.32467859929907e-20	1	0.943662	pos	0.470932	3.401999e-05	0.00296544
Citrobacter	Serratia	0.911111	0.938889	pos	0.633008	1.519019e-21	2.17687986015038e-21	0.901408	0.943662	pos	0.547587	7.731517e-07	0.000148854
Dickeya	Serratia	0.944444	0.938889	pos	0.636247	8.192095e-22	1.21416275816485e-21	0.971831	0.943662	pos	0.573988	1.667063e-07	4.36646872141148e-05
Escherichia	Serratia	0.972222	0.938889	pos	0.667776	1.33711e-24	2.88949167800453e-24	1	0.943662	pos	0.646047	1.170576e-09	5.99815195132605e-07
Geobacillus	Serratia	0.95	0.938889	pos	0.659064	8.508358e-24	1.63973006552073e-23	0.971831	0.943662	pos	0.199423	0.0954475	0.488679
Geobacter	Serratia	0.977778	0.938889	pos	0.614435	4.573485e-20	5.32177192307692e-20	0.985915	0.943662	pos	0.180146	0.132756	0.547788
Klebsiella	Serratia	0.916667	0.938889	pos	0.617448	2.673304e-20	3.21066000252048e-20	0.943662	0.943662	pos	0.502004	8.186076e-06	0.00100477
Marinobacter	Serratia	0.983333	0.938889	pos	0.674037	3.40156e-25	7.87773190765492e-25	0.985915	0.943662	pos	0.498684	9.596093e-06	0.00113418
Photobacterium	Serratia	0.977778	0.938889	pos	0.639365	4.488784e-22	6.87198578634538e-22	0.985915	0.943662	pos	0.624985	5.688026e-09	2.44536725108639e-06
Providencia	Serratia	0.95	0.938889	pos	0.624643	7.24135e-21	9.38274174031271e-21	0.957746	0.943662	pos	0.588768	6.648393e-08	2.06370662446698e-05
Pseudoalteromonas	Serratia	0.988889	0.938889	pos	0.652463	3.320617e-23	5.87659795914578e-23	0.985915	0.943662	pos	0.640849	1.748822e-09	8.69000499258699e-07
Psychromonas	Serratia	0.944444	0.938889	pos	0.60477	2.464971e-19	2.56874506615637e-19	0.957746	0.943662	pos	0.629249	4.170049e-09	1.85091005985811e-06
Acinetobacter	Shewanella	0.983333	1	pos	0.75521	1.754575e-34	1.20729962093863e-33	1	1	pos	0.459356	6.750078e-05	0.00495995
Actinobacillus	Shewanella	0.933333	1	pos	0.701544	5.45814e-28	1.83478215873016e-27	0.971831	1	pos	0.571702	1.914156e-07	4.91791492096019e-05
Aeromonas	Shewanella	0.95	1	pos	0.695029	2.674902e-27	8.19672542122186e-27	0.957746	1	pos	0.911097	2.897426e-28	5.6312074368639e-25
Alteromonas	Shewanella	0.977778	1	pos	0.629872	2.742951e-21	3.79119985931835e-21	0.985915	1	pos	0.886553	0	0
Bacillus	Shewanella	1	1	pos	0.749212	0	0	1	1	pos	0.0482227	0.689006	0.924711
Bacteroides	Shewanella	1	1	pos	0.783865	1.101812e-38	1.01944353009709e-37	1	1	neg	0.358618	0.00226163	0.0585325
Burkholderia	Shewanella	1	1	pos	0.806144	0	0	1	1	pos	0.331254	0.00496618	0.0970471
Clostridium	Shewanella	0.994444	1	pos	0.695968	0	0	0.985915	1	neg	0.24839	0.0369944	0.311332
Dickeya	Shewanella	0.944444	1	pos	0.633598	1.358148e-21	1.95368308528302e-21	0.971831	1	pos	0.686693	3.813278e-11	2.45105719273973e-08
Erythrobacter	Shewanella	0.972222	1	pos	0.667449	1.434779e-24	3.07960447522523e-24	0.985915	1	pos	0.274313	0.0208991	0.228548
Escherichia	Shewanella	0.972222	1	pos	0.691835	5.742475e-27	1.68387036153846e-26	1	1	pos	0.786553	0	0
Geobacillus	Shewanella	0.95	1	pos	0.657977	1.067217e-23	2.0402363109328e-23	0.971831	1	pos	0.195609	0.10209	0.500333
Geobacter	Shewanella	0.977778	1	pos	0.643192	2.125062e-22	3.44712184851064e-22	0.985915	1	pos	0.0756539	0.529781	0.855989
Haemophilus	Shewanella	0.961111	1	pos	0.693109	4.239034e-27	1.26441295837246e-26	0.985915	1	pos	0.317304	0.00723533	0.122657
Idiomarina	Shewanella	0.977778	1	pos	0.728551	4.608197e-31	2.29927316282722e-30	0.985915	1	pos	0.921999	0	0
Klebsiella	Shewanella	0.916667	1	pos	0.619385	1.887057e-20	2.31152354884319e-20	0.943662	1	pos	0.663872	2.782652e-10	1.59507148806283e-07
Marinobacter	Shewanella	0.983333	1	pos	0.822309	1.885937e-45	2.39639728133333e-44	0.985915	1	pos	0.692488	0	0
Methylobacterium	Shewanella	1	1	pos	0.62113	0	0	1	1	neg	0.211368	0.076902	0.446196
Mycobacterium	Shewanella	0.988889	1	pos	0.60461	2.533727e-19	2.63463374904528e-19	0.985915	1	neg	0.0123072	0.918762	0.973295
Nitrosococcus	Shewanella	0.966667	1	pos	0.70627	1.676466e-28	6.08636989714286e-28	1	1	pos	0.12884	0.283551	0.708445
Pantoea	Shewanella	0.944444	1	pos	0.65796	1.070923e-23	2.04399516316316e-23	0.943662	1	pos	0.631341	3.574734e-09	1.60736126694254e-06
Photobacterium	Shewanella	0.977778	1	pos	0.794918	1.762004e-40	1.77692043597884e-39	0.985915	1	pos	0.857277	0	0
Prevotella	Shewanella	0.983333	1	pos	0.699772	8.445182e-28	2.77048483511188e-27	1	1	neg	0.278504	0.0189658	0.2166
Providencia	Shewanella	0.95	1	pos	0.672922	4.350654e-25	9.88360729916567e-25	0.957746	1	pos	0.729065	5.639723e-13	6.30066400668367e-10
Pseudoalteromonas	Shewanella	0.988889	1	pos	0.879984	1.917906e-59	3.93067616774194e-58	0.985915	1	pos	0.956003	0	0
Pseudomonas	Shewanella	1	1	pos	0.777732	0	0	1	1	pos	0.646747	5.236241e-10	2.88085349690955e-07
Psychrobacter	Shewanella	0.966667	1	pos	0.689009	1.11952e-26	3.15651644970414e-26	0.971831	1	pos	0.426077	0.000211641	0.0116926
Psychromonas	Shewanella	0.944444	1	pos	0.769288	1.802007e-36	1.44311989159664e-35	0.957746	1	pos	0.746068	8.265726e-14	9.94475836384615e-11
Rhodopseudomonas	Shewanella	0.994444	1	neg	0.601899	0	0	0.985915	1	neg	0.460798	6.3692e-05	0.00474483
Roseobacter	Shewanella	1	1	pos	0.767482	0	0	1	1	neg	0.202716	0.0900093	0.47628
Roseovarius	Shewanella	0.994444	1	pos	0.640662	0	0	0.985915	1	neg	0.00479544	0.968368	0.988861
Ruegeria	Shewanella	1	1	pos	0.779438	0	0	1	1	neg	0.238129	0.0457531	0.346543
Actinobacillus	Shigella	0.933333	0.938889	pos	0.619656	1.796985e-20	2.20971187741936e-20	0.971831	0.943662	pos	0.361242	0.00196753	0.0534795
Dickeya	Shigella	0.944444	0.938889	pos	0.650642	4.805878e-23	8.35766739781022e-23	0.971831	0.943662	pos	0.612875	1.339713e-08	5.18949228180212e-06
Escherichia	Shigella	0.972222	0.938889	pos	0.691662	5.98302e-27	1.75171061751152e-26	1	0.943662	pos	0.69533	1.713318e-11	1.41039564834586e-08
Marinobacter	Shigella	0.983333	0.938889	pos	0.606599	1.800101e-19	1.91889961185682e-19	0.985915	0.943662	pos	0.467662	3.92118e-05	0.00330918
Pantoea	Shigella	0.944444	0.938889	pos	0.617076	2.857171e-20	3.41744245545797e-20	0.943662	0.943662	pos	0.617064	1.000276e-08	4.00665431195122e-06
Methylococcus	Sideroxydans	0.95	0.872222	pos	0.66469	2.593591e-24	5.40260595191257e-24	0.971831	0.84507	pos	0.285372	0.0158524	0.195606
Polynucleobacter	Sideroxydans	0.9	0.872222	pos	0.6102	9.635758e-20	1.06344845095541e-19	0.830986	0.84507	pos	0.231549	0.0520248	0.368987
Alicyclobacillus	Sphaerobacter	0.8	0.883333	pos	0.629146	3.142549e-21	4.29677072740316e-21	0.647887	0.816901	pos	0.4739	2.986656e-05	0.00270243
Candidatus.Koribacter	Sphaerobacter	0.872222	0.883333	pos	0.60491	2.406759e-19	2.51495759539474e-19	0.816901	0.816901	pos	0.454349	6.889175e-05	0.00503288
Candidatus.Solibacter	Sphaerobacter	0.9	0.883333	pos	0.633854	1.293628e-21	1.86650641029523e-21	0.859155	0.816901	pos	0.559693	3.889404e-07	8.66097756488136e-05
Chloroherpeton	Sphaerobacter	0.872222	0.883333	pos	0.699605	8.79927e-28	2.87674247341338e-27	0.830986	0.816901	pos	0.504156	7.378355e-06	0.00092954
Herpetosiphon	Sphaerobacter	0.872222	0.883333	pos	0.60915	1.157148e-19	1.263910652149e-19	0.802817	0.816901	pos	0.477271	2.572412e-05	0.00241178
Ktedonobacter	Sphaerobacter	0.861111	0.883333	pos	0.686215	2.150245e-26	5.86318593705293e-26	0.760563	0.816901	pos	0.523018	2.877934e-06	0.000443373
Myxococcus	Sphaerobacter	0.911111	0.883333	pos	0.612422	6.526816e-20	7.39162881521093e-20	0.887324	0.816901	pos	0.553556	5.528499e-07	0.000116866
Nocardioides	Sphaerobacter	0.877778	0.883333	pos	0.62992	2.718369e-21	3.75995015529753e-21	0.830986	0.816901	pos	0.483925	1.906884e-05	0.00191948
Roseiflexus	Sphaerobacter	0.961111	0.883333	pos	0.617751	2.532033e-20	3.05639955541482e-20	0.971831	0.816901	pos	0.55793	4.305831e-07	9.42219667624917e-05
Rubrobacter	Sphaerobacter	0.866667	0.883333	pos	0.641961	2.706115e-22	4.3234326823135e-22	0.802817	0.816901	pos	0.473388	3.054784e-05	0.00274667
Saccharomonospora	Sphaerobacter	0.85	0.883333	pos	0.628336	3.655574e-21	4.94852559943182e-21	0.788732	0.816901	pos	0.470682	3.439196e-05	0.00298925
Phenylobacterium	Sphingomonas	0.955556	0.994444	pos	0.636411	7.937005e-22	1.1791061208106e-21	0.957746	1	pos	0.359704	0.00206344	0.0550298
Algoriphagus	Spirosoma	0.955556	0.95	pos	0.680368	8.231382e-26	2.08908310146471e-25	0.971831	0.943662	pos	0.348347	0.00291113	0.068859
Chitinophaga	Spirosoma	0.972222	0.95	pos	0.751656	5.309438e-34	3.52605882508711e-33	0.943662	0.943662	pos	0.553505	5.544576e-07	0.00011689
Chryseobacterium	Spirosoma	0.894444	0.95	pos	0.603136	3.258812e-19	3.3484073703504e-19	0.830986	0.943662	pos	0.39766	0.000594639	0.0241617
Cytophaga	Spirosoma	0.944444	0.95	pos	0.746659	2.439946e-33	1.50991463506494e-32	0.929577	0.943662	pos	0.496235	1.0778e-05	0.00123071
Dokdonia	Spirosoma	0.988889	0.95	pos	0.63152	2.012589e-21	2.8309923498155e-21	0.985915	0.943662	pos	0.4548	6.761485e-05	0.00496611
Dyadobacter	Spirosoma	0.955556	0.95	pos	0.739187	2.236304e-32	1.27616629461078e-31	0.943662	0.943662	pos	0.522782	2.913068e-06	0.000446943
Kordia	Spirosoma	0.966667	0.95	pos	0.618506	2.210916e-20	2.6857908833652e-20	0.971831	0.943662	pos	0.408212	0.000409512	0.0187282
Leadbetterella	Spirosoma	0.894444	0.95	pos	0.701211	5.925999e-28	1.97119617696335e-27	0.816901	0.943662	pos	0.483039	1.985127e-05	0.00198647
Leeuwenhoekiella	Spirosoma	0.972222	0.95	pos	0.654273	2.293457e-23	4.1711154980916e-23	0.971831	0.943662	pos	0.542178	1.041921e-06	0.000191059
Maribacter	Spirosoma	0.955556	0.95	pos	0.677702	1.502521e-25	3.70000649354005e-25	0.971831	0.943662	pos	0.443996	0.000105108	0.00693792
Marivirga	Spirosoma	0.938889	0.95	pos	0.670831	6.884032e-25	1.53103442147024e-24	0.901408	0.943662	pos	0.438992	0.0001283	0.00807294
Mucilaginibacter	Spirosoma	0.916667	0.95	pos	0.62863	3.460103e-21	4.69391908754448e-21	0.887324	0.943662	pos	0.485409	1.782156e-05	0.00182468
Paludibacter	Spirosoma	0.805556	0.95	pos	0.689715	9.483367e-27	2.70588285958084e-26	0.704225	0.943662	pos	0.527472	2.285162e-06	0.000366831
Polaribacter	Spirosoma	0.994444	0.95	pos	0.601113	4.593823e-19	4.65735459468085e-19	0.985915	0.943662	pos	0.493049	1.25192e-05	0.00138125
Psychroflexus	Spirosoma	0.966667	0.95	pos	0.63536	9.70703e-22	1.42539284899846e-21	0.971831	0.943662	pos	0.398402	0.00057947	0.0237201
Robiginitalea	Spirosoma	0.983333	0.95	pos	0.707618	1.192016e-28	4.38839206177606e-28	0.985915	0.943662	pos	0.52278	2.913354e-06	0.000446943
Saccharomonospora	Stackebrandtia	0.85	0.827778	pos	0.612701	6.214321e-20	7.0629074692904e-20	0.788732	0.760563	pos	0.597912	3.677734e-08	1.26127748564718e-05
Acinetobacter	Staphylococcus	0.983333	0.944444	pos	0.671563	5.865926e-25	1.31380199247944e-24	1	0.943662	neg	0.244068	0.0402492	0.32504
Actinobacillus	Staphylococcus	0.933333	0.944444	pos	0.619305	1.914328e-20	2.34041640025657e-20	0.971831	0.943662	neg	0.114472	0.341823	0.752171
Anaeromyxobacter	Staphylococcus	0.95	0.944444	pos	0.636727	7.469888e-22	1.11492611808927e-21	0.957746	0.943662	pos	0.120705	0.316007	0.733553
Bacillus	Staphylococcus	1	0.944444	pos	0.66228	4.327482e-24	8.73747954661017e-24	1	0.943662	pos	0.388128	0.000824254	0.0301851
Bacteroides	Staphylococcus	1	0.944444	pos	0.641221	3.127394e-22	4.93036638875103e-22	1	0.943662	pos	0.1178	0.32788	0.743857
Burkholderia	Staphylococcus	1	0.944444	pos	0.610501	9.142795e-20	1.01197254761905e-19	1	0.943662	pos	0.0117548	0.922493	0.973295
Campylobacter	Staphylococcus	0.966667	0.944444	pos	0.668046	1.261305e-24	2.73965140318907e-24	0.957746	0.943662	pos	0.373937	0.0013167	0.041235
Clostridium	Staphylococcus	0.994444	0.944444	pos	0.623212	9.41445e-21	1.1986601002004e-20	0.985915	0.943662	pos	0.371493	0.00142434	0.0433377
Geobacillus	Staphylococcus	0.95	0.944444	pos	0.663603	3.269072e-24	6.75065138894908e-24	0.971831	0.943662	pos	0.0685258	0.570152	0.877181
Geobacter	Staphylococcus	0.977778	0.944444	pos	0.697906	1.332718e-27	4.25487522278057e-27	0.985915	0.943662	pos	0.137319	0.253475	0.683036
Lactobacillus	Staphylococcus	0.944444	0.944444	pos	0.646299	1.148827e-22	1.92921961409692e-22	0.943662	0.943662	pos	0.256473	0.030852	0.282569
Marinobacter	Staphylococcus	0.983333	0.944444	pos	0.652801	3.099175e-23	5.50515149114632e-23	0.985915	0.943662	neg	0.312719	0.00792623	0.129484
Neisseria	Staphylococcus	0.95	0.944444	pos	0.603046	3.308946e-19	3.39808786422414e-19	0.929577	0.943662	pos	0.0708595	0.55706	0.872374
Paenibacillus	Staphylococcus	0.944444	0.944444	pos	0.636335	8.054188e-22	1.19558273582555e-21	0.943662	0.943662	pos	0.325968	0.00553526	0.103719
Prevotella	Staphylococcus	0.983333	0.944444	pos	0.606871	1.717593e-19	1.83608090745934e-19	1	0.943662	pos	0.135424	0.260147	0.690394
Pseudomonas	Staphylococcus	1	0.944444	pos	0.609369	1.11389e-19	1.22015766666667e-19	1	0.943662	neg	0.246181	0.0384988	0.317837
Roseobacter	Staphylococcus	1	0.944444	pos	0.66464	2.621658e-24	5.45510933187773e-24	1	0.943662	neg	0.000871971	0.994242	0.999632
Serratia	Staphylococcus	0.938889	0.944444	pos	0.605615	2.132334e-19	2.25040343521595e-19	0.943662	0.943662	neg	0.137037	0.25446	0.683649
Acidiphilium	Starkeya	0.966667	0.961111	pos	0.644697	1.578932e-22	2.61009921248916e-22	0.943662	0.971831	pos	0.270171	0.0226882	0.238996
Ahrensia	Starkeya	0.933333	0.961111	pos	0.622879	1.000587e-20	1.2697195885486e-20	0.943662	0.971831	pos	0.367413	0.00162182	0.0470705
Asticcacaulis	Starkeya	0.911111	0.961111	pos	0.62501	6.768319e-21	8.81778264798359e-21	0.929577	0.971831	pos	0.241391	0.0425616	0.33452
Aurantimonas	Starkeya	0.944444	0.961111	pos	0.607194	1.624444e-19	1.74247871468768e-19	0.943662	0.971831	pos	0.0348624	0.772865	0.945707
Beijerinckia	Starkeya	0.916667	0.961111	pos	0.637145	6.892628e-22	1.03443692661417e-21	0.887324	0.971831	pos	0.239868	0.0439254	0.339796
Candidatus.Puniceispirillum	Starkeya	0.988889	0.961111	pos	0.649567	5.970804e-23	1.02618146293959e-22	0.971831	0.971831	pos	0.298471	0.0114638	0.161666
Chelativorans	Starkeya	0.966667	0.961111	pos	0.62429	7.726196e-21	9.9635518105548e-21	0.985915	0.971831	pos	0.0484578	0.688198	0.924711
Fulvimarina	Starkeya	0.955556	0.961111	pos	0.804469	4.00563e-42	4.41313917919075e-41	0.943662	0.971831	pos	0.399274	0.000562102	0.023235
Granulibacter	Starkeya	0.961111	0.961111	pos	0.689398	1.021654e-26	2.8977269702381e-26	0.971831	0.971831	pos	0.257558	0.0301262	0.278735
Hoeflea	Starkeya	0.944444	0.961111	pos	0.656944	1.322445e-23	2.49315545994065e-23	0.943662	0.971831	pos	0.151816	0.206279	0.636414
Hyphomonas	Starkeya	0.961111	0.961111	pos	0.645115	1.453634e-22	2.41764956719023e-22	0.971831	0.971831	pos	0.363076	0.00185846	0.0515829
Jannaschia	Starkeya	0.972222	0.961111	pos	0.622951	9.874757e-21	1.25558951581054e-20	0.957746	0.971831	pos	0.0618235	0.608526	0.894637
Ketogulonicigenium	Starkeya	0.927778	0.961111	pos	0.60481	2.448256e-19	2.55272206564551e-19	0.915493	0.971831	pos	0.161627	0.178113	0.607309
Maricaulis	Starkeya	0.972222	0.961111	pos	0.668327	1.187012e-24	2.59157488201604e-24	0.971831	0.971831	pos	0.430976	0.000175452	0.0101262
Methylocella	Starkeya	0.95	0.961111	pos	0.6881	1.385578e-26	3.85534550072993e-26	0.915493	0.971831	pos	0.14924	0.214174	0.645713
Oligotropha	Starkeya	0.955556	0.961111	pos	0.711902	3.981389e-29	1.58424372317328e-28	0.957746	0.971831	pos	0.206229	0.0844418	0.465682
Parvularcula	Starkeya	0.916667	0.961111	pos	0.673284	4.017623e-25	9.19278443937575e-25	0.957746	0.971831	pos	0.396395	0.000621316	0.0249266
Phenylobacterium	Starkeya	0.955556	0.961111	pos	0.637659	6.243161e-22	9.44401973492063e-22	0.957746	0.971831	pos	0.127772	0.288292	0.710563
Pseudovibrio	Starkeya	0.95	0.961111	pos	0.728696	4.426826e-31	2.21457489658793e-30	0.929577	0.971831	pos	0.309863	0.00854663	0.13581
Rhodomicrobium	Starkeya	0.922222	0.961111	pos	0.713189	2.85312e-29	1.15457467515924e-28	0.929577	0.971831	pos	0.443707	0.000106337	0.007005
Rhodopseudomonas	Starkeya	0.994444	0.961111	pos	0.808738	6.89466e-43	7.96437694545454e-42	0.985915	0.971831	pos	0.473025	3.103872e-05	0.00278167
Rhodospirillum	Starkeya	0.994444	0.961111	pos	0.634077	1.239949e-21	1.79585318693009e-21	0.985915	0.971831	pos	0.433102	0.000161598	0.00951726
Roseibium	Starkeya	0.966667	0.961111	pos	0.713988	2.31782e-29	9.5210450862069e-29	0.971831	0.971831	pos	0.201756	0.091556	0.480186
Roseomonas	Starkeya	0.911111	0.961111	pos	0.68094	7.227914e-26	1.84670296032172e-25	0.859155	0.971831	pos	0.382777	0.000985913	0.0339763
Chthoniobacter	Stigmatella	0.916667	0.883333	pos	0.625127	6.62441e-21	8.65395850582591e-21	0.929577	0.84507	pos	0.33246	0.0046158	0.0925457
Haliangium	Stigmatella	0.938889	0.883333	pos	0.684894	2.919883e-26	7.78363216503496e-26	0.957746	0.84507	pos	0.540083	1.167919e-06	0.000209852
Acinetobacter	Streptococcus	0.983333	0.95	pos	0.676424	2.000463e-25	4.86281465903308e-25	1	0.957746	neg	0.108957	0.365735	0.768041
Actinobacillus	Streptococcus	0.933333	0.95	pos	0.665465	2.197668e-24	4.6335787699115e-24	0.971831	0.957746	pos	0.125911	0.295431	0.717975
Anaeromyxobacter	Streptococcus	0.95	0.95	pos	0.636841	7.308177e-22	1.09250081270588e-21	0.957746	0.957746	pos	0.141693	0.238521	0.67046
Bacillus	Streptococcus	1	0.95	pos	0.689885	9.110717e-27	2.60345226416792e-26	1	0.957746	pos	0.23428	0.0492407	0.358867
Bacteroides	Streptococcus	1	0.95	pos	0.657739	1.121204e-23	2.12850082071713e-23	1	0.957746	pos	0.314464	0.00756687	0.125939
Burkholderia	Streptococcus	1	0.95	pos	0.611954	7.08708e-20	7.97401090909091e-20	1	0.957746	pos	0.070995	0.556304	0.871985
Clostridium	Streptococcus	0.994444	0.95	pos	0.654054	2.398631e-23	4.33756232068311e-23	0.985915	0.957746	pos	0.408196	0.000409741	0.0187361
Corynebacterium	Streptococcus	0.961111	0.95	pos	0.610317	9.441276e-20	1.04258818400927e-19	1	0.957746	pos	0.0530199	0.660565	0.913412
Escherichia	Streptococcus	0.972222	0.95	pos	0.616854	2.973376e-20	3.54646724405507e-20	1	0.957746	pos	0.00342064	0.977414	0.992578
Geobacillus	Streptococcus	0.95	0.95	pos	0.621407	1.308495e-20	1.63647734251969e-20	0.971831	0.957746	pos	0.14231	0.236462	0.667933
Geobacter	Streptococcus	0.977778	0.95	pos	0.604823	2.442523e-19	2.5495338652793e-19	0.985915	0.957746	pos	0.0825648	0.493644	0.841466
Granulibacter	Streptococcus	0.961111	0.95	neg	0.600114	5.438172e-19	5.45247545081536e-19	0.971831	0.957746	neg	0.0515783	0.669251	0.915884
Haemophilus	Streptococcus	0.961111	0.95	pos	0.61121	8.075262e-20	9.01666629876977e-20	0.985915	0.957746	pos	0.110031	0.361003	0.764733
Lactobacillus	Streptococcus	0.944444	0.95	pos	0.653917	2.467385e-23	4.45766427488152e-23	0.943662	0.957746	pos	0.446548	9.483302e-05	0.00641838
Marinobacter	Streptococcus	0.983333	0.95	pos	0.608681	1.255435e-19	1.36500804905876e-19	0.985915	0.957746	neg	0.13592	0.258389	0.688319
Paenibacillus	Streptococcus	0.944444	0.95	pos	0.607719	1.48338e-19	1.60006920203735e-19	0.943662	0.957746	pos	0.181108	0.130665	0.54512
Prevotella	Streptococcus	0.983333	0.95	pos	0.660252	6.634568e-24	1.30097598847737e-23	1	0.957746	pos	0.171569	0.152535	0.576841
Roseobacter	Streptococcus	1	0.95	pos	0.687572	1.567663e-26	4.33667006966618e-26	1	0.957746	pos	0.125658	0.296409	0.719138
Serratia	Streptococcus	0.938889	0.95	pos	0.615944	3.49787e-20	4.13838623215394e-20	0.943662	0.957746	neg	0.0435329	0.718492	0.93342
Staphylococcus	Streptococcus	0.944444	0.95	pos	0.697358	1.522835e-27	4.83753918333333e-27	0.943662	0.957746	pos	0.181946	0.128863	0.543963
Acinetobacter	Streptomyces	0.983333	0.977778	pos	0.696894	1.704657e-27	5.35267914662274e-27	1	0.971831	neg	0.0392693	0.745074	0.939055
Anaeromyxobacter	Streptomyces	0.95	0.977778	pos	0.678956	1.13297e-25	2.83019766710354e-25	0.957746	0.971831	pos	0.56602	2.686472e-07	6.35266494427646e-05
Bacillus	Streptomyces	1	0.977778	pos	0.751216	6.079914e-34	3.98223920412371e-33	1	0.971831	pos	0.41117	0.000368029	0.01732
Bacteroides	Streptomyces	1	0.977778	pos	0.723573	1.808857e-30	8.42953897799511e-30	1	0.971831	pos	0.207245	0.0828889	0.461581
Bartonella	Streptomyces	0.944444	0.977778	pos	0.620354	1.583717e-20	1.96265578803641e-20	0.915493	0.971831	neg	0.0379055	0.753642	0.943104
Burkholderia	Streptomyces	1	0.977778	pos	0.758806	5.613405e-35	3.97737915613383e-34	1	0.971831	pos	0.522271	2.99048e-06	0.000455795
Campylobacter	Streptomyces	0.966667	0.977778	pos	0.618048	2.400414e-20	2.90488195809524e-20	0.957746	0.971831	neg	0.0250178	0.835936	0.96105
Chlorobium	Streptomyces	0.972222	0.977778	pos	0.641715	2.839583e-22	4.51396596997498e-22	1	0.971831	pos	0.504397	7.292558e-06	0.000922325
Clostridium	Streptomyces	0.994444	0.977778	pos	0.740877	1.363765e-32	7.92480515243902e-32	0.985915	0.971831	pos	0.401496	0.000519973	0.0220381
Corynebacterium	Streptomyces	0.961111	0.977778	pos	0.685982	2.270015e-26	6.16331707977208e-26	1	0.971831	pos	0.396465	0.0006198	0.024884
Desulfovibrio	Streptomyces	0.972222	0.977778	pos	0.706216	1.699422e-28	6.15454633396584e-28	0.985915	0.971831	pos	0.657517	4.695404e-10	2.61838526455008e-07
Dickeya	Streptomyces	0.944444	0.977778	pos	0.627485	4.282529e-21	5.74823962957746e-21	0.971831	0.971831	pos	0.225465	0.0586911	0.392183
Erythrobacter	Streptomyces	0.972222	0.977778	pos	0.615041	4.107472e-20	4.80591874278699e-20	0.985915	0.971831	pos	0.225069	0.0591479	0.393602
Frankia	Streptomyces	0.977778	0.977778	pos	0.799394	3.067477e-41	3.21242371538462e-40	0.971831	0.971831	pos	0.757675	2.037657e-14	2.64537007879447e-11
Geobacillus	Streptomyces	0.95	0.977778	pos	0.690368	8.129282e-27	2.34763810484848e-26	0.971831	0.971831	pos	0.353267	0.0025117	0.062722
Geobacter	Streptomyces	0.977778	0.977778	pos	0.736039	5.558603e-32	3.04445325229885e-31	0.985915	0.971831	pos	0.506443	6.601973e-06	0.00085473
Lactobacillus	Streptomyces	0.944444	0.977778	pos	0.62967	2.848851e-21	3.92618221691974e-21	0.943662	0.971831	pos	0.177171	0.139383	0.558941
Marinobacter	Streptomyces	0.983333	0.977778	pos	0.667072	1.556444e-24	3.32204060918253e-24	0.985915	0.971831	pos	0.171011	0.153893	0.57899
Methylobacterium	Streptomyces	1	0.977778	pos	0.655585	1.751062e-23	3.25612114341463e-23	1	0.971831	pos	0.252366	0.0337346	0.296273
Mycobacterium	Streptomyces	0.988889	0.977778	pos	0.68056	7.880829e-26	2.0027813432e-25	0.985915	0.971831	pos	0.668382	1.904703e-10	1.12722382678378e-07
Neisseria	Streptomyces	0.95	0.977778	pos	0.639794	4.129948e-22	6.35838520840065e-22	0.929577	0.971831	pos	0.173823	0.147135	0.568589
Nitrosococcus	Streptomyces	0.966667	0.977778	pos	0.626283	5.35095e-21	7.08749874913134e-21	1	0.971831	pos	0.345526	0.00316489	0.0728023
Paenibacillus	Streptomyces	0.944444	0.977778	pos	0.632668	1.620086e-21	2.30783551270553e-21	0.943662	0.971831	pos	0.47418	2.950028e-05	0.00267962
Photobacterium	Streptomyces	0.977778	0.977778	pos	0.676863	1.813372e-25	4.42546354929577e-25	0.985915	0.971831	neg	0.00360499	0.976197	0.992069
Prevotella	Streptomyces	0.983333	0.977778	pos	0.642938	2.233852e-22	3.60823890847458e-22	1	0.971831	pos	0.148039	0.217925	0.649853
Pseudoalteromonas	Streptomyces	0.988889	0.977778	pos	0.671742	5.640203e-25	1.26473257858824e-24	0.985915	0.971831	neg	0.0782703	0.516463	0.852694
Pseudomonas	Streptomyces	1	0.977778	pos	0.678107	1.371937e-25	3.38719160880829e-25	1	0.971831	pos	0.257698	0.0300333	0.278317
Psychromonas	Streptomyces	0.944444	0.977778	pos	0.62417	7.898545e-21	1.0144627203504e-20	0.957746	0.971831	pos	0.00234752	0.984499	0.995516
Rhizobium	Streptomyces	0.988889	0.977778	pos	0.605973	2.004929e-19	2.12417713952196e-19	0.985915	0.971831	pos	0.184408	0.123681	0.535192
Roseobacter	Streptomyces	1	0.977778	pos	0.707955	1.09454e-28	4.074596171875e-28	1	0.971831	pos	0.117037	0.331046	0.743857
Shewanella	Streptomyces	1	0.977778	pos	0.662114	4.482021e-24	9.01132070253165e-24	1	0.971831	neg	0.00192825	0.987267	0.996722
Acidimicrobium	Streptosporangium	0.816667	0.855556	pos	0.628658	3.441974e-21	4.67265131339031e-21	0.746479	0.816901	pos	0.463689	4.650689e-05	0.00375508
Beutenbergia	Streptosporangium	0.738889	0.855556	pos	0.608278	1.346333e-19	1.45553641406693e-19	0.605634	0.816901	pos	0.434388	0.000153717	0.00921499
Catenulispora	Streptosporangium	0.844444	0.855556	pos	0.637538	6.390875e-22	9.64450336500396e-22	0.732394	0.816901	pos	0.386878	0.000859681	0.0310687
Conexibacter	Streptosporangium	0.8	0.855556	pos	0.615733	3.631622e-20	4.28598856470588e-20	0.661972	0.816901	pos	0.424855	0.000221678	0.0121009
Geodermatophilus	Streptosporangium	0.844444	0.855556	pos	0.617418	2.687772e-20	3.22600342065491e-20	0.732394	0.816901	pos	0.417921	0.000287371	0.0144879
Leifsonia	Streptosporangium	0.655556	0.855556	pos	0.610753	8.747917e-20	9.71650920862471e-20	0.422535	0.816901	pos	0.437659	0.000135227	0.00838671
Nakamurella	Streptosporangium	0.794444	0.855556	pos	0.616642	3.088139e-20	3.67644780387258e-20	0.676056	0.816901	pos	0.363962	0.00180773	0.0506273
Nocardioides	Streptosporangium	0.877778	0.855556	pos	0.625643	6.02309e-21	7.89546735900963e-21	0.830986	0.816901	pos	0.495693	1.105744e-05	0.00125693
Rubrobacter	Streptosporangium	0.866667	0.855556	pos	0.613665	5.241462e-20	6.03274551449275e-20	0.802817	0.816901	pos	0.350242	0.00275104	0.0664748
Saccharomonospora	Streptosporangium	0.85	0.855556	pos	0.692088	5.407259e-27	1.59539251609907e-26	0.788732	0.816901	pos	0.493799	1.208728e-05	0.00134535
Sphaerobacter	Streptosporangium	0.883333	0.855556	pos	0.611092	8.243497e-20	9.1883656619883e-20	0.816901	0.816901	pos	0.459444	5.567913e-05	0.00427792
Citreicella	Sulfitobacter	0.961111	0.972222	pos	0.643516	1.993595e-22	3.25324663527397e-22	0.957746	0.957746	pos	0.640955	1.734612e-09	8.64555363368741e-07
Loktanella	Sulfitobacter	0.933333	0.972222	pos	0.618535	2.199201e-20	2.67326346045918e-20	0.915493	0.957746	pos	0.619921	8.174794e-09	3.35212479808989e-06
Oceanibulbus	Sulfitobacter	0.944444	0.972222	pos	0.634767	1.087134e-21	1.58053196338673e-21	0.915493	0.957746	pos	0.499426	9.262658e-06	0.00110151
Oceanicola	Sulfitobacter	0.988889	0.972222	pos	0.702241	4.592151e-28	1.56576740715564e-27	1	0.957746	pos	0.749589	5.448739e-14	6.77903624335227e-11
Pelagibaca	Sulfitobacter	0.933333	0.972222	pos	0.6782	1.34354e-25	3.32138422827497e-25	0.915493	0.957746	pos	0.596707	3.98015e-08	1.34495902083333e-05
Phaeobacter	Sulfitobacter	0.961111	0.972222	pos	0.604396	2.627951e-19	2.72517660826986e-19	0.943662	0.957746	pos	0.751983	4.088312e-14	5.16471737676923e-11
Rhodobacter	Sulfitobacter	1	0.972222	pos	0.727657	5.90304e-31	2.90728533333333e-30	1	0.957746	pos	0.744358	1.009542e-13	1.1970726267509e-10
Sagittula	Sulfitobacter	0.988889	0.972222	pos	0.678424	1.277295e-25	3.16583130039012e-25	0.971831	0.957746	pos	0.617497	9.702205e-09	3.90053579348225e-06
Cyanobium	Synechococcus	0.916667	1	pos	0.863685	7.524826e-55	1.36593508152381e-53	0.873239	1	pos	0.850185	6.678643e-21	1.09136004306716e-17
Prochlorococcus	Synechococcus	1	1	pos	0.853148	0	0	1	1	pos	0.865292	0	0
Halothermothrix	Syntrophomonas	0.85	0.772222	pos	0.60936	1.115709e-19	1.22144822171166e-19	0.732394	0.633803	pos	0.384076	0.000944217	0.0330421
Bermanella	Teredinibacter	0.933333	0.955556	pos	0.609327	1.122111e-19	1.22775176004592e-19	0.957746	0.985915	pos	0.465944	4.222377e-05	0.00347794
Cellvibrio	Teredinibacter	0.95	0.955556	pos	0.708885	8.637959e-29	3.26018808990099e-28	0.971831	0.985915	pos	0.710492	3.922477e-12	3.58873867140669e-09
Congregibacter	Teredinibacter	0.95	0.955556	pos	0.790545	9.323611e-40	9.16020750824742e-39	0.971831	0.985915	pos	0.708825	4.633376e-12	4.18092174197802e-09
Hahella	Teredinibacter	0.966667	0.955556	pos	0.698215	1.23614e-27	3.97986966216216e-27	0.985915	0.985915	pos	0.575989	2.620522e-07	6.23111932966715e-05
Kangiella	Teredinibacter	0.938889	0.955556	pos	0.699529	8.963738e-28	2.92549394315068e-27	0.943662	0.985915	pos	0.5699	2.132786e-07	5.4075756625e-05
Neptuniibacter	Teredinibacter	0.944444	0.955556	pos	0.629357	3.021019e-21	4.13951273472322e-21	0.943662	0.985915	pos	0.481077	2.169265e-05	0.0021105
Nitrococcus	Teredinibacter	0.883333	0.955556	pos	0.625882	5.763127e-21	7.58075918702553e-21	0.887324	0.985915	pos	0.486476	1.697271e-05	0.00174848
Reinekea	Teredinibacter	0.955556	0.955556	pos	0.646035	1.210775e-22	2.03110870008795e-22	0.985915	0.985915	pos	0.667304	0	0
Saccharophagus	Teredinibacter	0.955556	0.955556	pos	0.757845	7.628169e-35	5.38492226444444e-34	0.985915	0.985915	pos	0.727364	0	0
Ahrensia	Thalassobium	0.933333	0.972222	pos	0.725808	9.824431e-31	4.6930740566416e-30	0.943662	0.971831	pos	0.34672	0.00305514	0.0711533
Aurantimonas	Thalassobium	0.944444	0.972222	pos	0.647119	9.757155e-23	1.65307888266667e-22	0.943662	0.971831	pos	0.109551	0.363114	0.766056
Candidatus.Puniceispirillum	Thalassobium	0.988889	0.972222	pos	0.759679	4.244354e-35	3.05273159396226e-34	0.971831	0.971831	pos	0.538465	1.274906e-06	0.000225376
Citreicella	Thalassobium	0.961111	0.972222	pos	0.667526	1.411188e-24	3.03580623927765e-24	0.957746	0.971831	pos	0.204754	0.0867382	0.470524
Croceibacter	Thalassobium	0.972222	0.972222	pos	0.659155	8.346887e-24	1.61227902735562e-23	0.971831	0.971831	pos	0.581993	1.018992e-07	2.8824555020654e-05
Cytophaga	Thalassobium	0.944444	0.972222	pos	0.642154	2.605576e-22	4.17681064423886e-22	0.929577	0.971831	pos	0.438441	0.000131125	0.00821294
Dinoroseobacter	Thalassobium	0.977778	0.972222	pos	0.860613	4.738825e-54	8.4413088317757e-53	0.985915	0.971831	pos	0.626615	5.054441e-09	2.21649722116822e-06
Dokdonia	Thalassobium	0.988889	0.972222	pos	0.617039	2.876334e-20	3.43502042857143e-20	0.985915	0.971831	pos	0.440161	0.000122494	0.00778065
Fulvimarina	Thalassobium	0.955556	0.972222	pos	0.689408	1.019371e-26	2.89556054545455e-26	0.943662	0.971831	pos	0.306408	0.00935373	0.143397
Hoeflea	Thalassobium	0.944444	0.972222	pos	0.71475	1.899732e-29	7.92317109846827e-29	0.943662	0.971831	pos	0.309527	0.00862239	0.136554
Jannaschia	Thalassobium	0.972222	0.972222	pos	0.867296	8.164082e-56	1.52556277372549e-54	0.957746	0.971831	pos	0.574991	1.568538e-07	4.17161254080972e-05
Ketogulonicigenium	Thalassobium	0.927778	0.972222	pos	0.710504	5.707783e-29	2.23848444403292e-28	0.915493	0.971831	pos	0.195943	0.101494	0.499081
Kordia	Thalassobium	0.966667	0.972222	pos	0.615222	3.977616e-20	4.66621407261538e-20	0.971831	0.971831	pos	0.522234	2.996244e-06	0.00045625
Labrenzia	Thalassobium	1	0.972222	pos	0.64252	2.424926e-22	3.90693910059172e-22	1	0.971831	pos	0.548647	7.288072e-07	0.00014215
Loktanella	Thalassobium	0.933333	0.972222	pos	0.876055	2.812797e-58	5.52700111546392e-57	0.915493	0.971831	pos	0.64945	8.962923e-10	4.710266998344e-07
Maribacter	Thalassobium	0.955556	0.972222	pos	0.656001	1.607223e-23	3.00035948873653e-23	0.971831	0.971831	pos	0.53989	1.180212e-06	0.0002114
Maricaulis	Thalassobium	0.972222	0.972222	pos	0.610457	9.212385e-20	1.01908333197911e-19	0.971831	0.971831	neg	0.126888	0.291667	0.713879
Maritimibacter	Thalassobium	0.972222	0.972222	pos	0.842383	1.135402e-49	1.7175208031746e-48	0.957746	0.971831	pos	0.40436	0.000469913	0.0205356
Oceanibulbus	Thalassobium	0.944444	0.972222	pos	0.791284	7.054638e-40	6.96691193160622e-39	0.915493	0.971831	pos	0.531498	1.849766e-06	0.000306541
Octadecabacter	Thalassobium	0.966667	0.972222	pos	0.81535	4.131539e-44	4.95264989559748e-43	0.971831	0.971831	pos	0.569309	2.209583e-07	5.51289472028127e-05
Pelagibaca	Thalassobium	0.933333	0.972222	pos	0.611551	7.606027e-20	8.51767770975323e-20	0.915493	0.971831	pos	0.161912	0.177338	0.606131
Phaeobacter	Thalassobium	0.961111	0.972222	pos	0.742636	8.119166e-33	4.86639320628931e-32	0.943662	0.971831	pos	0.617554	9.66389e-09	3.88989337003676e-06
Pseudovibrio	Thalassobium	0.95	0.972222	pos	0.689412	1.018283e-26	2.89556054545455e-26	0.929577	0.971831	pos	0.26777	0.0239693	0.246226
Psychroflexus	Thalassobium	0.966667	0.972222	pos	0.624799	7.036035e-21	9.1291236963921e-21	0.971831	0.971831	pos	0.518042	3.709685e-06	0.0005401
Rhodobacter	Thalassobium	1	0.972222	pos	0.825032	5.431711e-46	7.13989045931034e-45	1	0.971831	pos	0.632651	3.243958e-09	1.49766463588235e-06
Rhodopseudomonas	Thalassobium	0.994444	0.972222	pos	0.639514	4.360805e-22	6.69218545088567e-22	0.985915	0.971831	pos	0.186839	0.118721	0.526405
Robiginitalea	Thalassobium	0.983333	0.972222	pos	0.654907	2.013541e-23	3.6866562401537e-23	0.985915	0.971831	pos	0.4716	3.304019e-05	0.00291648
Roseibium	Thalassobium	0.966667	0.972222	pos	0.731407	2.073885e-31	1.06545143126685e-30	0.971831	0.971831	pos	0.401357	0.000522524	0.0221167
Sagittula	Thalassobium	0.988889	0.972222	pos	0.838493	8.275749e-49	1.23231074953125e-47	0.971831	0.971831	pos	0.594619	4.561289e-08	1.50419495832831e-05
Sulfitobacter	Thalassobium	0.972222	0.972222	pos	0.624477	7.466229e-21	9.66098606517312e-21	0.957746	0.971831	pos	0.544104	9.374608e-07	0.000174653
Chloroherpeton	Thermobaculum	0.872222	0.838889	pos	0.635792	8.938189e-22	1.3165524137558e-21	0.830986	0.760563	pos	0.447448	9.143571e-05	0.00625808
Ktedonobacter	Thermobaculum	0.861111	0.838889	pos	0.622273	1.117646e-20	1.40795325578321e-20	0.760563	0.760563	pos	0.444206	0.000104224	0.00690042
Rubrobacter	Thermobaculum	0.866667	0.838889	pos	0.651539	4.006954e-23	7.03894407741935e-23	0.802817	0.760563	pos	0.432528	0.000165235	0.00968112
Sphaerobacter	Thermobaculum	0.883333	0.838889	pos	0.612277	6.695542e-20	7.56921889205219e-20	0.816901	0.760563	pos	0.38195	0.00101329	0.0346469
Nakamurella	Thermobifida	0.794444	0.85	pos	0.721068	3.558986e-30	1.61510174190476e-29	0.676056	0.71831	pos	0.538353	1.282621e-06	0.000226488
Rubrobacter	Thermobifida	0.866667	0.85	pos	0.604641	2.520009e-19	2.62179975655022e-19	0.802817	0.71831	pos	0.397602	0.000595822	0.0241877
Salinispora	Thermobifida	0.894444	0.85	pos	0.641061	3.226691e-22	5.07431769471947e-22	0.859155	0.71831	pos	0.511117	5.246771e-06	0.000714481
Acidothermus	Thermobispora	0.811111	0.844444	pos	0.632255	1.751931e-21	2.48246021248143e-21	0.71831	0.774648	pos	0.424395	0.000225565	0.012248
Nakamurella	Thermobispora	0.794444	0.844444	pos	0.660184	6.730013e-24	1.3169820100616e-23	0.676056	0.774648	pos	0.577636	1.334283e-07	3.62491251253102e-05
Nocardioides	Thermobispora	0.877778	0.844444	pos	0.613756	5.157875e-20	5.95451832222895e-20	0.830986	0.774648	pos	0.524167	2.712502e-06	0.000423247
Rubrobacter	Thermobispora	0.866667	0.844444	pos	0.604082	2.773057e-19	2.87096504182509e-19	0.802817	0.774648	pos	0.50356	7.594191e-06	0.00094667
Salinispora	Thermobispora	0.894444	0.844444	pos	0.686903	1.832361e-26	5.02515117410072e-26	0.859155	0.774648	pos	0.59233	5.290285e-08	1.70413713476004e-05
Stackebrandtia	Thermobispora	0.827778	0.844444	pos	0.607484	1.545034e-19	1.66280903670243e-19	0.760563	0.774648	pos	0.527848	2.240732e-06	0.000361661
Thermobifida	Thermobispora	0.85	0.844444	pos	0.696027	2.102924e-27	6.52796928990228e-27	0.71831	0.774648	pos	0.579714	1.173893e-07	3.25102044953626e-05
Caldanaerobacter	Thermodesulfovibrio	0.888889	0.783333	pos	0.65028	5.170218e-23	8.95857773454545e-23	0.84507	0.619718	pos	0.317045	0.00706142	0.120794
Acidothermus	Thermomicrobium	0.811111	0.772222	pos	0.626969	4.712359e-21	6.28974527591036e-21	0.71831	0.647887	pos	0.402556	0.000500902	0.0214837
Alicyclobacillus	Thermomicrobium	0.8	0.772222	pos	0.702481	4.326674e-28	1.48054589658887e-27	0.647887	0.647887	pos	0.601227	2.953527e-08	1.04311904385484e-05
Candidatus.Koribacter	Thermomicrobium	0.872222	0.772222	pos	0.685605	2.47743e-26	6.67889898161245e-26	0.816901	0.647887	pos	0.501485	8.392728e-06	0.00102668
Candidatus.Solibacter	Thermomicrobium	0.9	0.772222	pos	0.686201	2.157189e-26	5.87371747714286e-26	0.859155	0.647887	pos	0.609995	1.633837e-08	6.2111334703125e-06
Chloroherpeton	Thermomicrobium	0.872222	0.772222	pos	0.675872	2.262765e-25	5.42494350943396e-25	0.830986	0.647887	pos	0.45611	6.402767e-05	0.00476551
Ktedonobacter	Thermomicrobium	0.861111	0.772222	pos	0.625698	5.962566e-21	7.83228862577533e-21	0.760563	0.647887	pos	0.468847	3.725086e-05	0.00318543
Nocardioides	Thermomicrobium	0.877778	0.772222	pos	0.614827	4.266731e-20	4.98003018126148e-20	0.830986	0.647887	pos	0.400151	0.000545108	0.0227617
Rubrobacter	Thermomicrobium	0.866667	0.772222	pos	0.702103	4.752098e-28	1.60879196944938e-27	0.802817	0.647887	pos	0.434714	0.000151775	0.0091297
Sphaerobacter	Thermomicrobium	0.883333	0.772222	pos	0.732674	1.450866e-31	7.51453966304348e-31	0.816901	0.647887	pos	0.492818	1.265553e-05	0.00139209
Streptosporangium	Thermomicrobium	0.855556	0.772222	pos	0.623172	9.484006e-21	1.20670997570093e-20	0.816901	0.647887	pos	0.416013	0.000308349	0.0152461
Thermobaculum	Thermomicrobium	0.838889	0.772222	pos	0.653552	2.658605e-23	4.77068751834431e-23	0.760563	0.647887	pos	0.482588	2.026078e-05	0.00201537
Thermobispora	Thermomicrobium	0.844444	0.772222	pos	0.600986	4.693712e-19	4.74852180042463e-19	0.774648	0.647887	pos	0.424731	0.000222719	0.0121456
Acidimicrobium	Thermomonospora	0.816667	0.883333	pos	0.609034	1.180743e-19	1.2867330806175e-19	0.746479	0.830986	pos	0.36004	0.00204212	0.054661
Acidothermus	Thermomonospora	0.811111	0.883333	pos	0.636005	8.579705e-22	1.26570570665635e-21	0.71831	0.830986	pos	0.368589	0.0015625	0.0459209
Nakamurella	Thermomonospora	0.794444	0.883333	pos	0.632578	1.647823e-21	2.34559420313667e-21	0.676056	0.830986	pos	0.402421	0.000503289	0.0215466
Rubrobacter	Thermomonospora	0.866667	0.883333	pos	0.621465	1.294696e-20	1.62134729040736e-20	0.802817	0.830986	pos	0.333857	0.00443667	0.0903551
Saccharomonospora	Thermomonospora	0.85	0.883333	pos	0.617075	2.858029e-20	3.41744245545797e-20	0.788732	0.830986	pos	0.346219	0.00310078	0.0718357
Thermobifida	Thermomonospora	0.85	0.883333	pos	0.640009	3.960767e-22	6.11768387520259e-22	0.71831	0.830986	pos	0.538818	1.250784e-06	0.000222429
Thermobispora	Thermomonospora	0.844444	0.883333	pos	0.692036	5.474106e-27	1.61013056111111e-26	0.774648	0.830986	pos	0.57532	1.537403e-07	4.10876893706265e-05
Thermomicrobium	Thermomonospora	0.772222	0.883333	pos	0.611507	7.665075e-20	8.57876274221961e-20	0.647887	0.830986	pos	0.263261	0.0265416	0.260277
Burkholderia	Thioalkalivibrio	1	0.972222	pos	0.701259	5.856383e-28	1.95829228035088e-27	1	0.985915	pos	0.456673	7.515544e-05	0.00538978
Marinobacter	Thioalkalivibrio	0.983333	0.972222	pos	0.701282	5.823135e-28	1.95059671528998e-27	0.985915	0.985915	pos	0.479879	2.886185e-05	0.00263621
Nitrosococcus	Thioalkalivibrio	0.966667	0.972222	pos	0.61371	5.200667e-20	6.00028529176755e-20	1	0.985915	pos	0.430584	0.000204818	0.0113984
Photobacterium	Thioalkalivibrio	0.977778	0.972222	pos	0.632734	1.599875e-21	2.28416610486891e-21	0.985915	0.985915	pos	0.217035	0.0691787	0.424993
Pseudoalteromonas	Thioalkalivibrio	0.988889	0.972222	pos	0.686754	1.896909e-26	5.19469619827586e-26	0.985915	0.985915	pos	0.191247	0.110039	0.51272
Shewanella	Thioalkalivibrio	1	0.972222	pos	0.649355	6.230841e-23	1.06894535967597e-22	1	0.985915	pos	0.260899	0.0282593	0.269471
Comamonas	Thiomonas	0.916667	0.772222	pos	0.606203	1.927342e-19	2.04652582284123e-19	0.929577	0.633803	pos	0.442344	0.0001123	0.00729394
Crocosphaera	Trichodesmium	0.905556	0.905556	pos	0.639956	4.001794e-22	6.17105126537217e-22	0.873239	0.873239	pos	0.588844	6.616202e-08	2.05788317036932e-05
Cyanothece	Trichodesmium	0.977778	0.905556	pos	0.664546	2.674546e-24	5.55908906870229e-24	0.985915	0.873239	pos	0.592582	5.205188e-08	1.68606511295858e-05
Lyngbya	Trichodesmium	0.877778	0.905556	pos	0.623587	8.79022e-21	1.12142967336011e-20	0.830986	0.873239	pos	0.436076	0.000143905	0.00880247
Shewanella	Trichodesmium	1	0.905556	neg	0.601654	4.192016e-19	4.2635979167556e-19	1	0.873239	neg	0.448238	8.854812e-05	0.00610625
Albidiferax	Variovorax	0.905556	0.961111	pos	0.638195	5.629961e-22	8.54355546656051e-22	0.901408	0.971831	pos	0.411145	0.000368362	0.0173239
Comamonas	Variovorax	0.916667	0.961111	pos	0.65912	8.408392e-24	1.62210477246964e-23	0.929577	0.971831	pos	0.440352	0.000121568	0.00773529
Methylococcus	Variovorax	0.95	0.961111	pos	0.608337	1.332656e-19	1.44320587272727e-19	0.971831	0.971831	pos	0.449127	8.539713e-05	0.00594295
Phenylobacterium	Variovorax	0.955556	0.961111	pos	0.605594	2.139958e-19	2.25595129867257e-19	0.957746	0.971831	pos	0.205793	0.0851152	0.467347
Acinetobacter	Vibrio	0.983333	1	pos	0.760455	3.306474e-35	2.3962507391635e-34	1	1	pos	0.510228	7.476172e-06	0.000937604
Actinobacillus	Vibrio	0.933333	1	pos	0.703387	3.454301e-28	1.19925276976321e-27	0.971831	1	pos	0.563704	3.078931e-07	7.1117460028481e-05
Aeromonas	Vibrio	0.95	1	pos	0.688747	1.190668e-26	3.33737236470588e-26	0.957746	1	pos	0.805225	2.576344e-17	3.77773691303571e-14
Alteromonas	Vibrio	0.977778	1	pos	0.60106	4.635629e-19	4.69474435387885e-19	0.985915	1	pos	0.738598	0	0
Bacillus	Vibrio	1	1	pos	0.765447	0	0	1	1	pos	0.0490275	0.684087	0.922789
Bacteroides	Vibrio	1	1	pos	0.779896	4.587444e-38	4.08582629158878e-37	1	1	neg	0.247854	0.0374147	0.313113
Burkholderia	Vibrio	1	1	pos	0.840592	0	0	1	1	pos	0.218846	0.0668473	0.417603
Campylobacter	Vibrio	0.966667	1	pos	0.608383	1.322131e-19	1.43425252475811e-19	0.957746	1	neg	0.248768	0.0364425	0.308758
Chlorobium	Vibrio	0.972222	1	pos	0.60963	1.064351e-19	1.16790616350029e-19	1	1	neg	0.0945674	0.431904	0.808809
Clostridium	Vibrio	0.994444	1	pos	0.747976	0	0	0.985915	1	neg	0.25389	0.0329092	0.292571
Corynebacterium	Vibrio	0.961111	1	pos	0.615098	4.065639e-20	4.7628198733866e-20	1	1	neg	0.287257	0.0154192	0.192479
Dickeya	Vibrio	0.944444	1	pos	0.630422	2.474411e-21	3.44501633747261e-21	0.971831	1	pos	0.553442	5.564428e-07	0.000117233
Erythrobacter	Vibrio	0.972222	1	pos	0.662523	4.110812e-24	8.32646936450585e-24	0.985915	1	pos	0.148055	0.217357	0.649207
Escherichia	Vibrio	0.972222	1	pos	0.745193	3.791319e-33	2.30135478152866e-32	1	1	pos	0.724447	0	0
Geobacillus	Vibrio	0.95	1	pos	0.705973	1.806943e-28	6.48593852730697e-28	0.971831	1	pos	0.185163	0.122125	0.532358
Geobacter	Vibrio	0.977778	1	pos	0.662191	4.410474e-24	8.88621928541226e-24	0.985915	1	neg	0.0447015	0.710675	0.929705
Haemophilus	Vibrio	0.961111	1	pos	0.709738	6.946297e-29	2.66928267782258e-28	0.985915	1	pos	0.221764	0.0632254	0.406791
Idiomarina	Vibrio	0.977778	1	pos	0.710155	6.24193e-29	2.42798338367347e-28	0.985915	1	pos	0.805164	0	0
Klebsiella	Vibrio	0.916667	1	pos	0.601247	4.490798e-19	4.55775345473908e-19	0.943662	1	pos	0.59071	5.871698e-08	1.86157197547297e-05
Marinobacter	Vibrio	0.983333	1	pos	0.833149	1.164776e-47	1.66922034285714e-46	0.985915	1	pos	0.595473	8.484753e-08	2.46456049523873e-05
Methylobacterium	Vibrio	1	1	pos	0.667086	0	0	1	1	neg	0.290644	0.0142095	0.183363
Mycobacterium	Vibrio	0.988889	1	pos	0.635052	1.029658e-21	1.50500624846626e-21	0.985915	1	neg	0.0806841	0.502713	0.844452
Neisseria	Vibrio	0.95	1	pos	0.616251	3.311591e-20	3.92530624751244e-20	0.929577	1	pos	0.0643636	0.593851	0.887513
Nitrosococcus	Vibrio	0.966667	1	pos	0.713513	2.622459e-29	1.0680356525641e-28	1	1	pos	0.0355466	0.768063	0.945314
Pantoea	Vibrio	0.944444	1	pos	0.674333	3.185425e-25	7.44482665686275e-25	0.943662	1	pos	0.559403	3.955181e-07	8.78363066501014e-05
Photobacterium	Vibrio	0.977778	1	pos	0.811957	1.775654e-43	2.08913365679012e-42	0.985915	1	pos	0.782093	0	0
Prevotella	Vibrio	0.983333	1	pos	0.693943	3.472774e-27	1.04567255039494e-26	1	1	neg	0.207914	0.0819383	0.459322
Providencia	Vibrio	0.95	1	pos	0.711062	4.945171e-29	1.95144843188406e-28	0.957746	1	pos	0.696268	1.568158e-11	1.30397300225316e-08
Pseudoalteromonas	Vibrio	0.988889	1	pos	0.857513	2.904504e-53	4.98737353513513e-52	0.985915	1	pos	0.872267	0	0
Pseudomonas	Vibrio	1	1	pos	0.781335	0	0	1	1	pos	0.57505	2.761511e-07	6.50202219e-05
Psychrobacter	Vibrio	0.966667	1	pos	0.6475	9.041006e-23	1.5358429087344e-22	0.971831	1	pos	0.43991	0.000123722	0.00784047
Psychromonas	Vibrio	0.944444	1	pos	0.735035	7.413699e-32	3.95812613277311e-31	0.957746	1	pos	0.705892	6.195092e-12	5.48466022334232e-09
Ralstonia	Vibrio	0.972222	1	pos	0.622709	1.032095e-20	1.30796081781915e-20	0.985915	1	pos	0.168612	0.159534	0.58332
Roseobacter	Vibrio	1	1	pos	0.768721	0	0	1	1	neg	0.0428571	0.72212	0.935267
Roseovarius	Vibrio	0.994444	1	pos	0.620795	0	0	0.985915	1	pos	0.0576459	0.632276	0.900984
Ruegeria	Vibrio	1	1	pos	0.799066	0	0	1	1	neg	0.0700201	0.560938	0.87277
Serratia	Vibrio	0.938889	1	pos	0.612811	6.095165e-20	6.94404332934848e-20	0.943662	1	pos	0.620139	8.049135e-09	3.30885936974343e-06
Shewanella	Vibrio	1	1	pos	0.892419	0	0	1	1	pos	0.885848	0	0
Streptomyces	Vibrio	0.977778	1	pos	0.662084	4.510369e-24	9.05876007797682e-24	0.971831	1	neg	0.129646	0.281222	0.707976
Thioalkalivibrio	Vibrio	0.972222	1	pos	0.624353	7.637431e-21	9.86242783604336e-21	0.985915	1	pos	0.236452	0.0473357	0.352017
Blattabacterium	Weeksella	0.761111	0.861111	pos	0.61112	8.203689e-20	9.14934536805149e-20	0.605634	0.816901	pos	0.303571	0.0100653	0.149843
Croceibacter	Weeksella	0.972222	0.861111	pos	0.735692	6.141973e-32	3.31631743286119e-31	0.971831	0.816901	pos	0.618243	9.205708e-09	3.71914000140221e-06
Cytophaga	Weeksella	0.944444	0.861111	pos	0.645104	1.456833e-22	2.42085762685266e-22	0.929577	0.816901	pos	0.491423	1.350614e-05	0.00146698
Dokdonia	Weeksella	0.988889	0.861111	pos	0.690133	8.593768e-27	2.47427821873112e-26	0.985915	0.816901	pos	0.639143	1.991695e-09	9.73485388727679e-07
Dyadobacter	Weeksella	0.955556	0.861111	pos	0.605842	2.050611e-19	2.16888317359956e-19	0.943662	0.816901	pos	0.363398	0.0018399	0.0512703
Kordia	Weeksella	0.966667	0.861111	pos	0.741008	1.312332e-32	7.67271408588957e-32	0.971831	0.816901	pos	0.581981	1.019748e-07	2.8824555020654e-05
Leeuwenhoekiella	Weeksella	0.972222	0.861111	pos	0.71205	3.832303e-29	1.53131436436059e-28	0.971831	0.816901	pos	0.497938	9.942579e-06	0.0011684
Maribacter	Weeksella	0.955556	0.861111	pos	0.768745	2.162561e-36	1.71743386083333e-35	0.971831	0.816901	pos	0.647188	1.070727e-09	5.55585524146919e-07
Marivirga	Weeksella	0.938889	0.861111	pos	0.643417	2.033078e-22	3.30917734244236e-22	0.901408	0.816901	pos	0.481947	2.08574e-05	0.00205975
Mucilaginibacter	Weeksella	0.916667	0.861111	pos	0.635547	9.366913e-22	1.37651011395528e-21	0.887324	0.816901	pos	0.502997	7.803514e-06	0.000966479
Polaribacter	Weeksella	0.994444	0.861111	pos	0.649723	5.785889e-23	9.97098050090416e-23	0.985915	0.816901	pos	0.582969	9.587944e-08	2.72422850044983e-05
Psychroflexus	Weeksella	0.966667	0.861111	pos	0.626151	5.482977e-21	7.24224127650728e-21	0.971831	0.816901	pos	0.518911	3.549841e-06	0.000521684
Riemerella	Weeksella	0.877778	0.861111	pos	0.673312	3.99199e-25	9.14511170673077e-25	0.830986	0.816901	pos	0.5927	5.165524e-08	1.67486888985193e-05
Robiginitalea	Weeksella	0.983333	0.861111	pos	0.70809	1.057412e-28	3.95181818039216e-28	0.985915	0.816901	pos	0.568875	2.267562e-07	5.51289472028127e-05
Rickettsia	Wolbachia	0.988889	0.95	pos	0.658007	1.060539e-23	2.02950535542169e-23	1	0.957746	pos	0.633556	3.032856e-09	1.41098685195467e-06
Acinetobacter	Xanthomonas	0.983333	0.983333	pos	0.672291	4.998855e-25	1.13156978978622e-24	1	0.985915	pos	0.46097	5.220521e-05	0.00409825
Actinobacillus	Xanthomonas	0.933333	0.983333	pos	0.607096	1.652036e-19	1.7689778741573e-19	0.971831	0.985915	pos	0.416489	0.000302984	0.0150646
Aeromonas	Xanthomonas	0.95	0.983333	pos	0.674055	3.387929e-25	7.85570884914842e-25	0.957746	0.985915	pos	0.517342	3.843248e-06	0.000555849
Anaeromyxobacter	Xanthomonas	0.95	0.983333	pos	0.639077	4.746285e-22	7.24292971176942e-22	0.957746	0.985915	pos	0.279287	0.0183396	0.212589
Bacillus	Xanthomonas	1	0.983333	pos	0.653087	2.923769e-23	5.21300628063611e-23	1	0.985915	pos	0.22185	0.0629703	0.405985
Bacteroides	Xanthomonas	1	0.983333	pos	0.704715	2.478308e-28	8.78002797026022e-28	1	0.985915	pos	0.0475188	0.693938	0.924956
Burkholderia	Xanthomonas	1	0.983333	pos	0.75938	4.670825e-35	3.34683926691729e-34	1	0.985915	pos	0.631913	3.426404e-09	1.54803236013755e-06
Corynebacterium	Xanthomonas	0.961111	0.983333	pos	0.60639	1.866235e-19	1.9860658347292e-19	1	0.985915	pos	0.151192	0.208175	0.638331
Desulfovibrio	Xanthomonas	0.972222	0.983333	pos	0.650169	5.288155e-23	9.14630075317604e-23	0.985915	0.985915	pos	0.332867	0.00456301	0.0919274
Dickeya	Xanthomonas	0.944444	0.983333	pos	0.627949	3.928561e-21	5.29550018811881e-21	0.971831	0.985915	pos	0.4765	2.662133e-05	0.00247843
Erythrobacter	Xanthomonas	0.972222	0.983333	pos	0.654502	2.188267e-23	3.99123148516746e-23	0.985915	0.985915	pos	0.263114	0.0266294	0.260687
Escherichia	Xanthomonas	0.972222	0.983333	pos	0.727227	6.648366e-31	3.24917579384615e-30	1	0.985915	pos	0.501379	8.435687e-06	0.00102925
Frankia	Xanthomonas	0.977778	0.983333	pos	0.615629	3.699499e-20	4.36069579097093e-20	0.971831	0.985915	pos	0.205872	0.0849934	0.467133
Geobacillus	Xanthomonas	0.95	0.983333	pos	0.665431	2.213942e-24	4.6627330961326e-24	0.971831	0.985915	pos	0.253509	0.0329111	0.292571
Geobacter	Xanthomonas	0.977778	0.983333	pos	0.662165	4.433887e-24	8.92395841816262e-24	0.985915	0.985915	pos	0.384544	0.000929601	0.0327153
Haemophilus	Xanthomonas	0.961111	0.983333	pos	0.619333	1.904852e-20	2.33182267951188e-20	0.985915	0.985915	pos	0.313802	0.00770146	0.127306
Marinobacter	Xanthomonas	0.983333	0.983333	pos	0.7562	1.28476e-34	8.93705313868613e-34	0.985915	0.985915	pos	0.571668	1.918025e-07	4.91791492096019e-05
Photobacterium	Xanthomonas	0.977778	0.983333	pos	0.766785	4.163776e-36	3.23924777795918e-35	0.985915	0.985915	pos	0.497087	1.035225e-05	0.00120405
Providencia	Xanthomonas	0.95	0.983333	pos	0.605508	2.171794e-19	2.28698307403315e-19	0.957746	0.985915	pos	0.479866	2.290657e-05	0.00220261
Pseudoalteromonas	Xanthomonas	0.988889	0.983333	pos	0.721546	3.129437e-30	1.4303853529976e-29	0.985915	0.985915	pos	0.486641	1.684529e-05	0.00173963
Pseudomonas	Xanthomonas	1	0.983333	pos	0.717606	8.959587e-30	3.88113018681818e-29	1	0.985915	pos	0.698061	1.322624e-11	1.11390375876923e-08
Ralstonia	Xanthomonas	0.972222	0.983333	pos	0.679271	1.055304e-25	2.63964491338583e-25	0.985915	0.985915	pos	0.271951	0.0217763	0.234065
Roseobacter	Xanthomonas	1	0.983333	pos	0.709461	7.456063e-29	2.85366587911647e-28	1	0.985915	pos	0.159726	0.183337	0.614319
Ruegeria	Xanthomonas	1	0.983333	pos	0.624934	6.863169e-21	8.92914683549488e-21	1	0.985915	pos	0.195726	0.10188	0.499724
Shewanella	Xanthomonas	1	0.983333	pos	0.694578	2.981818e-27	9.06434626475279e-27	1	0.985915	pos	0.55703	4.53447e-07	9.86990950198807e-05
Streptomyces	Xanthomonas	0.977778	0.983333	pos	0.666956	1.595786e-24	3.40220147203579e-24	0.971831	0.985915	pos	0.282332	0.0170561	0.203789
Vibrio	Xanthomonas	1	0.983333	pos	0.72556	1.051637e-30	4.9985539201995e-30	1	0.985915	pos	0.50931	5.736448e-06	0.000764988
Acidiphilium	Yersinia	0.966667	0.983333	neg	0.613875	5.0507e-20	5.8378618556701e-20	0.943662	1	neg	0.275275	0.0201568	0.224177
Acinetobacter	Yersinia	0.983333	0.983333	pos	0.770235	1.30891e-36	1.06614635042735e-35	1	1	pos	0.414587	0.000365213	0.0172219
Actinobacillus	Yersinia	0.933333	0.983333	pos	0.746298	2.720667e-33	1.67277138774194e-32	0.971831	1	pos	0.659496	3.994942e-10	2.26393781438793e-07
Aeromonas	Yersinia	0.95	0.983333	pos	0.624843	6.979574e-21	9.06203545231608e-21	0.957746	1	pos	0.641068	1.71972e-09	8.59742210958904e-07
Ahrensia	Yersinia	0.933333	0.983333	neg	0.603733	2.943257e-19	3.03727549648078e-19	0.943662	1	neg	0.561264	3.550417e-07	7.99281847659356e-05
Anaeromyxobacter	Yersinia	0.95	0.983333	pos	0.680001	8.94678e-26	2.25562998412698e-25	0.957746	1	pos	0.11942	0.321222	0.737936
Aurantimonas	Yersinia	0.944444	0.983333	neg	0.610909	8.51186e-20	9.47087283129013e-20	0.943662	1	neg	0.367133	0.00163623	0.0473797
Bacillus	Yersinia	1	0.983333	pos	0.73329	1.218663e-31	6.34637070491803e-31	1	1	pos	0.124514	0.300132	0.722705
Bacteroides	Yersinia	1	0.983333	pos	0.790075	1.112495e-39	1.08739254871795e-38	1	1	neg	0.0669349	0.578362	0.882458
Beijerinckia	Yersinia	0.916667	0.983333	neg	0.665209	2.321225e-24	4.86716705170517e-24	0.887324	1	neg	0.354022	0.00245497	0.0617417
Burkholderia	Yersinia	1	0.983333	pos	0.783822	1.119162e-38	1.03049409275362e-37	1	1	pos	0.492958	1.635599e-05	0.0017006
Candidatus.Pelagibacter	Yersinia	0.994444	0.983333	neg	0.618965	2.035507e-20	2.47902641661342e-20	0.985915	1	neg	0.708518	0	0
Chelativorans	Yersinia	0.966667	0.983333	neg	0.619234	1.939025e-20	2.36909080128205e-20	0.985915	1	neg	0.261268	0.0280309	0.268235
Citrobacter	Yersinia	0.911111	0.983333	pos	0.613682	5.225579e-20	6.01809883625378e-20	0.901408	1	pos	0.605885	2.161282e-08	7.90965360350779e-06
Clostridium	Yersinia	0.994444	0.983333	pos	0.654266	2.296601e-23	4.1728517693041e-23	0.985915	1	neg	0.250034	0.0357316	0.305464
Corynebacterium	Yersinia	0.961111	0.983333	pos	0.635076	1.024868e-21	1.49915457252494e-21	1	1	neg	0.0385312	0.749199	0.940957
Dickeya	Yersinia	0.944444	0.983333	pos	0.689299	1.045759e-26	2.95291356148148e-26	0.971831	1	pos	0.642074	1.591935e-09	8.0073355348392e-07
Enterobacter	Yersinia	0.944444	0.983333	pos	0.670937	6.72691e-25	1.50134548711944e-24	0.929577	1	pos	0.71568	2.317297e-12	2.41627868614286e-09
Escherichia	Yersinia	0.972222	0.983333	pos	0.728441	4.751093e-31	2.35822480677083e-30	1	1	pos	0.630416	7.289308e-09	3.02681372836915e-06
Geobacillus	Yersinia	0.95	0.983333	pos	0.651953	3.683797e-23	6.50724474698795e-23	0.971831	1	pos	0.10322	0.391665	0.784933
Geobacter	Yersinia	0.977778	0.983333	pos	0.680107	8.733249e-26	2.20942862758621e-25	0.985915	1	pos	0.0772636	0.521041	0.855705
Haemophilus	Yersinia	0.961111	0.983333	pos	0.737737	3.407291e-32	1.89338094635569e-31	0.985915	1	pos	0.492354	1.679822e-05	0.00173614
Idiomarina	Yersinia	0.977778	0.983333	pos	0.62263	1.047168e-20	1.32618086910299e-20	0.985915	1	pos	0.683099	0	0
Klebsiella	Yersinia	0.916667	0.983333	pos	0.668783	1.075353e-24	2.35588829655172e-24	0.943662	1	pos	0.630905	3.691718e-09	1.65424725196453e-06
Lactobacillus	Yersinia	0.944444	0.983333	pos	0.609167	1.153642e-19	1.26080369954128e-19	0.943662	1	neg	0.21261	0.07506	0.441714
Marinobacter	Yersinia	0.983333	0.983333	pos	0.799452	2.99861e-41	3.15765229834254e-40	0.985915	1	pos	0.574883	2.787429e-07	6.55572198317824e-05
Methylocella	Yersinia	0.95	0.983333	neg	0.601244	4.493219e-19	4.55778361575306e-19	0.915493	1	neg	0.338144	0.00392462	0.0836726
Mycobacterium	Yersinia	0.988889	0.983333	pos	0.656409	1.477295e-23	2.77138215551181e-23	0.985915	1	pos	0.137391	0.252599	0.682306
Neisseria	Yersinia	0.95	0.983333	pos	0.601691	4.165944e-19	4.239342906567e-19	0.929577	1	pos	0.18967	0.11314	0.518921
Nitrosococcus	Yersinia	0.966667	0.983333	pos	0.736005	5.614745e-32	3.06639082234957e-31	1	1	pos	0.296579	0.0122871	0.16867
Paenibacillus	Yersinia	0.944444	0.983333	pos	0.618347	2.275102e-20	2.76024469255251e-20	0.943662	1	neg	0.0183114	0.879527	0.969126
Pantoea	Yersinia	0.944444	0.983333	pos	0.613011	5.883969e-20	6.73159958823529e-20	0.943662	1	pos	0.549593	6.912203e-07	0.000136194
Photobacterium	Yersinia	0.977778	0.983333	pos	0.764262	9.584755e-36	7.22076799604743e-35	0.985915	1	pos	0.651844	0	0
Prevotella	Yersinia	0.983333	0.983333	pos	0.694833	2.804375e-27	8.56592748397436e-27	1	1	neg	0.0769282	0.522856	0.855968
Providencia	Yersinia	0.95	0.983333	pos	0.73894	2.40274e-32	1.36705147462687e-31	0.957746	1	pos	0.656528	5.08825e-10	2.81357096590909e-07
Pseudoalteromonas	Yersinia	0.988889	0.983333	pos	0.752557	4.016581e-34	2.70516020706714e-33	0.985915	1	pos	0.640912	2.167415e-09	1.04383914050587e-06
Pseudomonas	Yersinia	1	0.983333	pos	0.775997	1.80996e-37	1.53323722666667e-36	1	1	pos	0.619584	1.753058e-08	6.58810829965675e-06
Psychromonas	Yersinia	0.944444	0.983333	pos	0.648164	7.915985e-23	1.34954091323792e-22	0.957746	1	pos	0.501325	8.457775e-06	0.00103118
Ralstonia	Yersinia	0.972222	0.983333	pos	0.656133	1.564072e-23	2.9226678745098e-23	0.985915	1	pos	0.378404	0.00122831	0.0393948
Rhodomicrobium	Yersinia	0.922222	0.983333	neg	0.613509	5.388768e-20	6.19854665540133e-20	0.929577	1	neg	0.405769	0.000446931	0.0198053
Rhodopseudomonas	Yersinia	0.994444	0.983333	neg	0.619041	2.007772e-20	2.446811657289e-20	0.985915	1	neg	0.405466	0.000501924	0.0215165
Roseobacter	Yersinia	1	0.983333	pos	0.765075	7.335137e-36	5.5923084488e-35	1	1	neg	0.0567404	0.637642	0.904112
Ruegeria	Yersinia	1	0.983333	pos	0.672323	4.964694e-25	1.12517321807372e-24	1	1	pos	0.00972502	0.935789	0.978896
Serratia	Yersinia	0.938889	0.983333	pos	0.688878	1.154473e-26	3.25025928803545e-26	0.943662	1	pos	0.65039	8.32081e-10	4.41520460185784e-07
Shewanella	Yersinia	1	0.983333	pos	0.815984	3.136303e-44	3.78341361898734e-43	1	1	pos	0.742991	0	0
Staphylococcus	Yersinia	0.944444	0.983333	pos	0.613332	5.558855e-20	6.38263712650602e-20	0.943662	1	neg	0.303899	0.00998087	0.149127
Streptococcus	Yersinia	0.95	0.983333	pos	0.649802	5.694089e-23	9.82165939728507e-23	0.957746	1	neg	0.0643885	0.593708	0.887513
Streptomyces	Yersinia	0.977778	0.983333	pos	0.66003	6.950104e-24	1.35726416229508e-23	0.971831	1	pos	0.0799135	0.507669	0.847361
Vibrio	Yersinia	1	0.983333	pos	0.805308	2.843386e-42	3.18793748e-41	1	1	pos	0.666834	0	0
Xanthomonas	Yersinia	0.983333	0.983333	pos	0.722616	2.34439e-30	1.08456488834951e-29	0.985915	1	pos	0.537027	1.377666e-06	0.000239799
Algoriphagus	Zunongwangia	0.955556	0.977778	pos	0.704484	2.625909e-28	9.28568191836735e-28	0.971831	0.957746	pos	0.376776	0.0012009	0.0388193
Blattabacterium	Zunongwangia	0.761111	0.977778	pos	0.632538	1.660388e-21	2.35956834873323e-21	0.605634	0.957746	pos	0.335899	0.00418576	0.0870929
Candidatus.Sulcia	Zunongwangia	0.655556	0.977778	pos	0.604698	2.495646e-19	2.59787071327144e-19	0.394366	0.957746	pos	0.463641	4.660251e-05	0.00375812
Chitinophaga	Zunongwangia	0.972222	0.977778	pos	0.692517	4.882778e-27	1.44736778662519e-26	0.943662	0.957746	pos	0.488521	1.544954e-05	0.00163167
Chryseobacterium	Zunongwangia	0.894444	0.977778	pos	0.648215	7.834671e-23	1.33687403097583e-22	0.830986	0.957746	pos	0.533122	1.697344e-06	0.000285313
Croceibacter	Zunongwangia	0.972222	0.977778	pos	0.864051	6.024071e-55	1.10402685826923e-53	0.971831	0.957746	pos	0.701622	9.396291e-12	8.05811686789817e-09
Cytophaga	Zunongwangia	0.944444	0.977778	pos	0.727252	6.602168e-31	3.23489259845758e-30	0.929577	0.957746	pos	0.438686	0.000129859	0.00815383
Dinoroseobacter	Zunongwangia	0.977778	0.977778	pos	0.608406	1.316917e-19	1.42940991002278e-19	0.985915	0.957746	pos	0.480667	2.209673e-05	0.00214157
Dokdonia	Zunongwangia	0.988889	0.977778	pos	0.867299	8.148766e-56	1.52556277372549e-54	0.985915	0.957746	pos	0.635132	2.695913e-09	1.26860473411891e-06
Dyadobacter	Zunongwangia	0.955556	0.977778	pos	0.693623	3.749176e-27	1.12534322141732e-26	0.943662	0.957746	pos	0.341623	0.00354846	0.0784854
Jannaschia	Zunongwangia	0.972222	0.977778	pos	0.602973	3.350296e-19	3.43869907162089e-19	0.957746	0.957746	pos	0.466664	4.093576e-05	0.00339963
Kordia	Zunongwangia	0.966667	0.977778	pos	0.827252	1.937781e-46	2.60099337042254e-45	0.971831	0.957746	pos	0.58594	7.955079e-08	2.37455679434105e-05
Leadbetterella	Zunongwangia	0.894444	0.977778	pos	0.656915	1.330294e-23	2.50547466798419e-23	0.816901	0.957746	pos	0.361244	0.00196745	0.0534795
Leeuwenhoekiella	Zunongwangia	0.972222	0.977778	pos	0.864081	5.915753e-55	1.09470147747573e-53	0.971831	0.957746	pos	0.587483	7.214832e-08	2.20361314215613e-05
Maribacter	Zunongwangia	0.955556	0.977778	pos	0.868677	3.430857e-56	6.6052661030303e-55	0.971831	0.957746	pos	0.682155	5.742585e-11	3.60646416094646e-08
Marivirga	Zunongwangia	0.938889	0.977778	pos	0.728973	4.098085e-31	2.06638889153439e-30	0.901408	0.957746	pos	0.550042	6.740569e-07	0.000133533
Mucilaginibacter	Zunongwangia	0.916667	0.977778	pos	0.611287	7.967557e-20	8.90161995427901e-20	0.887324	0.957746	pos	0.472599	3.162551e-05	0.00281353
Paludibacter	Zunongwangia	0.805556	0.977778	pos	0.634319	1.184147e-21	1.71633778098859e-21	0.704225	0.957746	pos	0.370012	0.00149339	0.044722
Polaribacter	Zunongwangia	0.994444	0.977778	pos	0.833895	8.096412e-48	1.17799704366412e-46	0.985915	0.957746	pos	0.721587	1.254675e-12	1.36008012252475e-09
Psychroflexus	Zunongwangia	0.966667	0.977778	pos	0.823787	9.622486e-46	1.24765022557823e-44	0.971831	0.957746	pos	0.649843	8.688979e-10	4.58703751167737e-07
Riemerella	Zunongwangia	0.877778	0.977778	pos	0.637668	6.232072e-22	9.43473330579825e-22	0.830986	0.957746	pos	0.602708	2.675846e-08	9.55320649923913e-06
Robiginitalea	Zunongwangia	0.983333	0.977778	pos	0.822664	1.605315e-45	2.05351032885906e-44	0.985915	0.957746	pos	0.669808	1.687383e-10	1.0004140492148e-07
Spirosoma	Zunongwangia	0.95	0.977778	pos	0.679302	1.047891e-25	2.62454697240473e-25	0.943662	0.957746	pos	0.455553	6.553083e-05	0.00485539
Thalassobium	Zunongwangia	0.972222	0.977778	pos	0.634686	1.104162e-21	1.60406461280488e-21	0.971831	0.957746	pos	0.448409	8.793317e-05	0.0060766
Weeksella	Zunongwangia	0.861111	0.977778	pos	0.655169	1.907872e-23	3.52023623620523e-23	0.816901	0.957746	pos	0.51302	4.773564e-06	0.000664913
Acidiphilium	Zymomonas	0.966667	0.933333	pos	0.673229	4.066561e-25	9.29360343645084e-25	0.943662	0.915493	pos	0.222259	0.062474	0.404245
Acinetobacter	Zymomonas	0.983333	0.933333	neg	0.646456	1.11358e-22	1.87333052074139e-22	1	0.915493	neg	0.330932	0.0048191	0.0951523
Ahrensia	Zymomonas	0.933333	0.933333	pos	0.611696	7.415644e-20	8.32723767020024e-20	0.943662	0.915493	pos	0.181985	0.12878	0.543748
Asticcacaulis	Zymomonas	0.911111	0.933333	pos	0.630856	2.280673e-21	3.18926099633162e-21	0.929577	0.915493	pos	0.211432	0.0767262	0.445824
Aurantimonas	Zymomonas	0.944444	0.933333	pos	0.646024	1.213605e-22	2.03262840949033e-22	0.943662	0.915493	pos	0.083608	0.488182	0.839834
Beijerinckia	Zymomonas	0.916667	0.933333	pos	0.694701	2.894544e-27	8.8272013824e-27	0.887324	0.915493	pos	0.211806	0.0761943	0.444629
Candidatus.Pelagibacter	Zymomonas	0.994444	0.933333	pos	0.714653	1.948328e-29	8.10810735371179e-29	0.985915	0.915493	pos	0.455701	6.513014e-05	0.00483224
Candidatus.Puniceispirillum	Zymomonas	0.988889	0.933333	pos	0.605936	2.017879e-19	2.13670965222222e-19	0.971831	0.915493	pos	0.21726	0.068762	0.423404
Chelativorans	Zymomonas	0.966667	0.933333	pos	0.666735	1.673585e-24	3.552174844098e-24	0.985915	0.915493	pos	0.0736802	0.54143	0.863589
Fulvimarina	Zymomonas	0.955556	0.933333	pos	0.67199	5.341352e-25	1.20196185501771e-24	0.943662	0.915493	pos	0.233329	0.0501959	0.362633
Gluconobacter	Zymomonas	0.911111	0.933333	pos	0.71688	1.085439e-29	4.62829246979866e-29	0.901408	0.915493	pos	0.155568	0.195156	0.625433
Granulibacter	Zymomonas	0.961111	0.933333	pos	0.684196	3.430449e-26	9.01853212965517e-26	0.971831	0.915493	pos	0.224515	0.0597925	0.395504
Hirschia	Zymomonas	0.938889	0.933333	pos	0.632251	1.753091e-21	2.48246021248143e-21	0.929577	0.915493	pos	0.211751	0.0762724	0.444872
Hyphomonas	Zymomonas	0.961111	0.933333	pos	0.601373	4.396037e-19	4.46395659136921e-19	0.971831	0.915493	pos	0.140175	0.243641	0.673283
Maricaulis	Zymomonas	0.972222	0.933333	pos	0.675733	2.333859e-25	5.58134912672522e-25	0.971831	0.915493	pos	0.192169	0.108382	0.509566
Methylocella	Zymomonas	0.95	0.933333	pos	0.666191	1.881137e-24	3.97940857047725e-24	0.915493	0.915493	pos	0.171361	0.153038	0.577645
Methylosinus	Zymomonas	0.861111	0.933333	pos	0.683996	3.592271e-26	9.41797596423659e-26	0.816901	0.915493	pos	0.358343	0.00215172	0.0566619
Oceanicaulis	Zymomonas	0.938889	0.933333	pos	0.642489	2.440092e-22	3.92142947048904e-22	0.957746	0.915493	pos	0.160448	0.18134	0.611461
Oligotropha	Zymomonas	0.955556	0.933333	pos	0.684306	3.344833e-26	8.81777551590595e-26	0.957746	0.915493	pos	0.366921	0.00164725	0.0475647
Parvularcula	Zymomonas	0.916667	0.933333	pos	0.667334	1.471008e-24	3.15027106516854e-24	0.957746	0.915493	pos	0.201692	0.0916598	0.48043
Pseudovibrio	Zymomonas	0.95	0.933333	pos	0.675911	2.243181e-25	5.39155483732661e-25	0.929577	0.915493	pos	0.194791	0.103558	0.503046
Rhodomicrobium	Zymomonas	0.922222	0.933333	pos	0.674661	2.961975e-25	6.96978314814815e-25	0.929577	0.915493	pos	0.114154	0.343176	0.75316
Rhodopseudomonas	Zymomonas	0.994444	0.933333	pos	0.751007	6.484695e-34	4.21837155972696e-33	0.985915	0.915493	pos	0.379572	0.00109598	0.0364794
Roseobacter	Zymomonas	1	0.933333	neg	0.641083	3.212772e-22	5.05660068703551e-22	1	0.915493	neg	0.140786	0.241571	0.673283
Starkeya	Zymomonas	0.961111	0.933333	pos	0.660435	6.384371e-24	1.25449599237113e-23	0.971831	0.915493	pos	0.319672	0.00657777	0.115678
Anaeromyxobacter	unclassified..derived.from.Actinobacteria..class..	0.95	0.866667	pos	0.604245	2.69657e-19	2.79329479347826e-19	0.957746	0.830986	pos	0.471217	3.359784e-05	0.00295118
Sphaerobacter	unclassified..derived.from.Alicyclobacillaceae.	0.883333	0.772222	pos	0.625961	5.679804e-21	7.4866572780083e-21	0.816901	0.676056	pos	0.584838	8.527281e-08	2.47076189785714e-05
Acinetobacter	unclassified..derived.from.Alphaproteobacteria.	0.983333	0.994444	pos	0.640875	3.346041e-22	5.23608714778325e-22	1	0.985915	neg	0.245238	0.0395216	0.321967
Agrobacterium	unclassified..derived.from.Alphaproteobacteria.	0.994444	0.994444	pos	0.677463	0	0	0.985915	0.985915	pos	0.30161	0.0108394	0.156633
Bacillus	unclassified..derived.from.Alphaproteobacteria.	1	0.994444	pos	0.800095	0	0	1	0.985915	pos	0.0760563	0.527589	0.855968
Bacteroides	unclassified..derived.from.Alphaproteobacteria.	1	0.994444	pos	0.713221	2.829489e-29	1.14744809234043e-28	1	0.985915	pos	0.191516	0.109534	0.511858
Burkholderia	unclassified..derived.from.Alphaproteobacteria.	1	0.994444	pos	0.750116	0	0	1	0.985915	neg	0.119785	0.318969	0.736276
Campylobacter	unclassified..derived.from.Alphaproteobacteria.	0.966667	0.994444	pos	0.699045	1.009298e-27	3.27163603401361e-27	0.957746	0.985915	pos	0.210168	0.0785471	0.450742
Clostridium	unclassified..derived.from.Alphaproteobacteria.	0.994444	0.994444	pos	0.798409	0	0	0.985915	0.985915	pos	0.160496	0.180817	0.610691
Erythrobacter	unclassified..derived.from.Alphaproteobacteria.	0.972222	0.994444	pos	0.658863	8.87321e-24	1.70659316448032e-23	0.985915	0.985915	neg	0.227062	0.057056	0.386542
Frankia	unclassified..derived.from.Alphaproteobacteria.	0.977778	0.994444	pos	0.639218	4.618741e-22	7.0539425849359e-22	0.971831	0.985915	pos	0.136738	0.255506	0.684996
Fusobacterium	unclassified..derived.from.Alphaproteobacteria.	0.955556	0.994444	pos	0.63502	1.035876e-21	1.51293460229885e-21	0.957746	0.985915	pos	0.317616	0.00695374	0.119629
Geobacillus	unclassified..derived.from.Alphaproteobacteria.	0.95	0.994444	pos	0.652624	3.213054e-23	5.70212376536313e-23	0.971831	0.985915	pos	0.178992	0.135297	0.552396
Geobacter	unclassified..derived.from.Alphaproteobacteria.	0.977778	0.994444	pos	0.670763	6.98803e-25	1.55235258508158e-24	0.985915	0.985915	neg	0.0842052	0.484203	0.837153
Marinobacter	unclassified..derived.from.Alphaproteobacteria.	0.983333	0.994444	pos	0.64556	1.330648e-22	2.22085384238179e-22	0.985915	0.985915	neg	0.343058	0.00356567	0.0787284
Methylobacterium	unclassified..derived.from.Alphaproteobacteria.	1	0.994444	pos	0.664395	0	0	1	0.985915	pos	0.18662	0.11904	0.526405
Paenibacillus	unclassified..derived.from.Alphaproteobacteria.	0.944444	0.994444	pos	0.616692	3.060655e-20	3.64600526875e-20	0.943662	0.985915	pos	0.147279	0.220324	0.652277
Photobacterium	unclassified..derived.from.Alphaproteobacteria.	0.977778	0.994444	pos	0.672116	5.195496e-25	1.17329566066351e-24	0.985915	0.985915	neg	0.32495	0.00589873	0.10794
Prevotella	unclassified..derived.from.Alphaproteobacteria.	0.983333	0.994444	pos	0.674127	3.334178e-25	7.74993081463415e-25	1	0.985915	pos	0.0841046	0.484727	0.837569
Pseudoalteromonas	unclassified..derived.from.Alphaproteobacteria.	0.988889	0.994444	pos	0.697794	1.369522e-27	4.36506510367893e-27	0.985915	0.985915	neg	0.278773	0.0188475	0.215804
Pseudomonas	unclassified..derived.from.Alphaproteobacteria.	1	0.994444	pos	0.69483	0	0	1	0.985915	neg	0.332998	0.00473253	0.0939854
Rhizobium	unclassified..derived.from.Alphaproteobacteria.	0.988889	0.994444	pos	0.627489	4.279332e-21	5.74799632980973e-21	0.985915	0.985915	pos	0.2889	0.0148216	0.188071
Rickettsia	unclassified..derived.from.Alphaproteobacteria.	0.988889	0.994444	pos	0.727066	6.950927e-31	3.38835469616368e-30	1	0.985915	pos	0.297083	0.0121352	0.167266
Roseobacter	unclassified..derived.from.Alphaproteobacteria.	1	0.994444	pos	0.710872	0	0	1	0.985915	pos	0.204795	0.0867085	0.470524
Ruegeria	unclassified..derived.from.Alphaproteobacteria.	1	0.994444	pos	0.666056	0	0	1	0.985915	pos	0.0610329	0.612374	0.895165
Shewanella	unclassified..derived.from.Alphaproteobacteria.	1	0.994444	pos	0.696085	0	0	1	0.985915	neg	0.357545	0.00233537	0.059731
Staphylococcus	unclassified..derived.from.Alphaproteobacteria.	0.944444	0.994444	pos	0.602603	3.568425e-19	3.65274868421053e-19	0.943662	0.985915	pos	0.186015	0.120385	0.528793
Streptococcus	unclassified..derived.from.Alphaproteobacteria.	0.95	0.994444	pos	0.628912	3.282759e-21	4.46605185867238e-21	0.957746	0.985915	pos	0.116771	0.332151	0.743857
Streptomyces	unclassified..derived.from.Alphaproteobacteria.	0.977778	0.994444	pos	0.682104	5.544144e-26	1.42799168432432e-25	0.971831	0.985915	pos	0.179328	0.134555	0.550961
Vibrio	unclassified..derived.from.Alphaproteobacteria.	1	0.994444	pos	0.693647	0	0	1	0.985915	neg	0.313716	0.0079499	0.129704
Wolbachia	unclassified..derived.from.Alphaproteobacteria.	0.95	0.994444	pos	0.602939	3.370229e-19	3.45729627233584e-19	0.957746	0.985915	pos	0.278313	0.0187676	0.215335
Yersinia	unclassified..derived.from.Alphaproteobacteria.	0.983333	0.994444	pos	0.614399	4.603138e-20	5.34974452926829e-20	1	0.985915	neg	0.429376	0.000214157	0.0117923
Aeromonas	unclassified..derived.from.Alteromonadales.	0.95	0.9	pos	0.634613	1.119631e-21	1.62529831378522e-21	0.957746	0.971831	pos	0.810295	1.135499e-17	1.726668166875e-14
Idiomarina	unclassified..derived.from.Alteromonadales.	0.977778	0.9	pos	0.600028	5.517984e-19	5.517984e-19	0.985915	0.971831	pos	0.81503	5.166449e-18	7.89277212230232e-15
Klebsiella	unclassified..derived.from.Alteromonadales.	0.916667	0.9	pos	0.608325	1.335384e-19	1.44533895741056e-19	0.943662	0.971831	pos	0.521862	3.05384e-06	0.00046373
Marinobacter	unclassified..derived.from.Alteromonadales.	0.983333	0.9	pos	0.64656	1.090789e-22	1.83661116077738e-22	0.985915	0.971831	pos	0.541319	1.091935e-06	0.000198479
Photobacterium	unclassified..derived.from.Alteromonadales.	0.977778	0.9	pos	0.612916	5.982696e-20	6.83224600119832e-20	0.985915	0.971831	pos	0.772642	2.970552e-15	3.98241900881633e-12
Pseudoalteromonas	unclassified..derived.from.Alteromonadales.	0.988889	0.9	pos	0.683523	4.005265e-26	1.04432764569083e-25	0.985915	0.971831	pos	0.925444	8.523039e-31	1.6663302230625e-27
Psychromonas	unclassified..derived.from.Alteromonadales.	0.944444	0.9	pos	0.616637	3.091019e-20	3.67698671241422e-20	0.957746	0.971831	pos	0.619375	8.497285e-09	3.45845817184015e-06
Shewanella	unclassified..derived.from.Alteromonadales.	1	0.9	pos	0.636132	8.373804e-22	1.23724576930233e-21	1	0.971831	pos	0.867931	1.174906e-22	1.96889668484694e-19
Vibrio	unclassified..derived.from.Alteromonadales.	1	0.9	pos	0.617289	2.750607e-20	3.29664443494657e-20	1	0.971831	pos	0.82774	5.555079e-19	8.85724986866505e-16
Aciduliprofundum	unclassified..derived.from.Archaea.	0.777778	0.944444	pos	0.645645	1.308555e-22	2.18589468010517e-22	0.619718	0.943662	pos	0.442698	0.000110719	0.00723274
Acidiphilium	unclassified..derived.from.Bacteria.	0.966667	1	pos	0.655472	1.792566e-23	3.32680700681597e-23	0.943662	1	pos	0.249872	0.0355928	0.304928
Acinetobacter	unclassified..derived.from.Bacteria.	0.983333	1	neg	0.610541	9.078621e-20	1.00662313123909e-19	1	1	neg	0.328708	0.00512914	0.0991111
Ahrensia	unclassified..derived.from.Bacteria.	0.933333	1	pos	0.78737	3.049525e-39	2.86324859605911e-38	0.943662	1	pos	0.406048	0.000442496	0.0196777
Aurantimonas	unclassified..derived.from.Bacteria.	0.944444	1	pos	0.650364	5.083861e-23	8.82569133879781e-23	0.943662	1	pos	0.323856	0.00586748	0.107645
Bacteroides	unclassified..derived.from.Bacteria.	1	1	neg	0.617778	2.519689e-20	3.04342663751584e-20	1	1	pos	0.236119	0.0474363	0.352425
Beijerinckia	unclassified..derived.from.Bacteria.	0.916667	1	pos	0.685544	2.512408e-26	6.76362944632768e-26	0.887324	1	pos	0.445564	9.867977e-05	0.00660792
Buchnera	unclassified..derived.from.Bacteria.	0.794444	1	pos	0.605339	2.235904e-19	2.34671422026432e-19	0.676056	1	pos	0.398678	0.000573924	0.0235595
Candidatus.Pelagibacter	unclassified..derived.from.Bacteria.	0.994444	1	pos	0.686651	1.942975e-26	5.31321427546628e-26	0.985915	1	pos	0.658456	4.349511e-10	2.44208313761538e-07
Candidatus.Puniceispirillum	unclassified..derived.from.Bacteria.	0.988889	1	pos	0.780046	4.348117e-38	3.89085023568075e-37	0.971831	1	pos	0.469257	3.659366e-05	0.00314232
Chelativorans	unclassified..derived.from.Bacteria.	0.966667	1	pos	0.721039	3.587077e-30	1.62398307885986e-29	0.985915	1	pos	0.398042	0.000586789	0.0239185
Dinoroseobacter	unclassified..derived.from.Bacteria.	0.977778	1	pos	0.608302	1.340813e-19	1.45039136095346e-19	0.985915	1	neg	0.0301478	0.802914	0.953442
Fulvimarina	unclassified..derived.from.Bacteria.	0.955556	1	pos	0.700356	7.316483e-28	2.4168486305026e-27	0.943662	1	pos	0.275478	0.020061	0.223519
Granulibacter	unclassified..derived.from.Bacteria.	0.961111	1	pos	0.706017	1.787026e-28	6.42655010566038e-28	0.971831	1	pos	0.429467	0.00018594	0.0105791
Hoeflea	unclassified..derived.from.Bacteria.	0.944444	1	pos	0.756874	1.038066e-34	7.27409483823529e-34	0.943662	1	pos	0.332157	0.00465556	0.0930418
Jannaschia	unclassified..derived.from.Bacteria.	0.972222	1	pos	0.668454	1.154772e-24	2.5244707706422e-24	0.957746	1	pos	0.0181262	0.880737	0.969126
Ketogulonicigenium	unclassified..derived.from.Bacteria.	0.927778	1	pos	0.633253	1.450179e-21	2.08135630572289e-21	0.915493	1	neg	0.0559273	0.643185	0.906082
Loktanella	unclassified..derived.from.Bacteria.	0.933333	1	pos	0.63513	1.014329e-21	1.48601927286703e-21	0.915493	1	pos	0.0600869	0.61865	0.898726
Maricaulis	unclassified..derived.from.Bacteria.	0.972222	1	pos	0.702872	3.926419e-28	1.35330101518987e-27	0.971831	1	pos	0.114539	0.341539	0.752171
Maritimibacter	unclassified..derived.from.Bacteria.	0.972222	1	pos	0.619822	1.743765e-20	2.14842669036846e-20	0.957746	1	neg	0.0814756	0.499381	0.84213
Methylocella	unclassified..derived.from.Bacteria.	0.95	1	pos	0.699096	9.967411e-28	3.23643702998296e-27	0.915493	1	pos	0.293147	0.0131006	0.17489
Octadecabacter	unclassified..derived.from.Bacteria.	0.966667	1	pos	0.605421	2.204522e-19	2.3176055885273e-19	0.971831	1	neg	0.00726035	0.952083	0.985872
Oligotropha	unclassified..derived.from.Bacteria.	0.955556	1	pos	0.709013	8.360339e-29	3.16795350576541e-28	0.957746	1	pos	0.396948	0.000609513	0.0246004
Pseudomonas	unclassified..derived.from.Bacteria.	1	1	neg	0.605214	2.284145e-19	2.39513118151815e-19	1	1	neg	0.494169	1.187923e-05	0.00132891
Pseudovibrio	unclassified..derived.from.Bacteria.	0.95	1	pos	0.751353	5.829291e-34	3.83125125724138e-33	0.929577	1	pos	0.314442	0.00757136	0.125993
Rhodomicrobium	unclassified..derived.from.Bacteria.	0.922222	1	pos	0.725624	1.033512e-30	4.92468468e-30	0.929577	1	pos	0.402351	0.000504532	0.0215776
Rhodopseudomonas	unclassified..derived.from.Bacteria.	0.994444	1	pos	0.750548	7.467731e-34	4.84132492721088e-33	0.985915	1	pos	0.601279	2.9433e-08	1.04062605113025e-05
Rhodospirillum	unclassified..derived.from.Bacteria.	0.994444	1	pos	0.628031	3.868885e-21	5.21875075017693e-21	0.985915	1	pos	0.586876	7.497752e-08	2.26348725474265e-05
Roseibium	unclassified..derived.from.Bacteria.	0.966667	1	pos	0.772941	5.205126e-37	4.3513027e-36	0.971831	1	pos	0.345747	0.00314433	0.0725311
Roseomonas	unclassified..derived.from.Bacteria.	0.911111	1	pos	0.662571	4.069374e-24	8.25130515319149e-24	0.859155	1	pos	0.239477	0.0442811	0.340998
Starkeya	unclassified..derived.from.Bacteria.	0.961111	1	pos	0.679824	9.312209e-26	2.34465922774108e-25	0.971831	1	pos	0.333255	0.00451307	0.0914066
Thalassobium	unclassified..derived.from.Bacteria.	0.972222	1	pos	0.669112	1.001127e-24	2.19832726036866e-24	0.971831	1	pos	0.0945187	0.433011	0.809719
Yersinia	unclassified..derived.from.Bacteria.	0.983333	1	neg	0.635614	9.247666e-22	1.36108504988417e-21	1	1	neg	0.5714	1.949245e-07	4.99017355007794e-05
Algoriphagus	unclassified..derived.from.Bacteroidetes.	0.955556	0.972222	pos	0.661684	4.907975e-24	9.81595e-24	0.971831	0.985915	pos	0.331022	0.0048069	0.095012
Blattabacterium	unclassified..derived.from.Bacteroidetes.	0.761111	0.972222	pos	0.668453	1.154952e-24	2.5244707706422e-24	0.605634	0.985915	pos	0.44822	8.861262e-05	0.00610942
Chitinophaga	unclassified..derived.from.Bacteroidetes.	0.972222	0.972222	pos	0.653548	2.660672e-23	4.77068751834431e-23	0.943662	0.985915	pos	0.432447	0.000165755	0.00969943
Chryseobacterium	unclassified..derived.from.Bacteroidetes.	0.894444	0.972222	pos	0.679505	1.000948e-25	2.51357956258235e-25	0.830986	0.985915	pos	0.596586	4.011838e-08	1.35166812230769e-05
Croceibacter	unclassified..derived.from.Bacteroidetes.	0.972222	0.972222	pos	0.841951	1.419468e-49	2.13031969133858e-48	0.971831	0.985915	pos	0.715566	2.344545e-12	2.43695420245253e-09
Cytophaga	unclassified..derived.from.Bacteroidetes.	0.944444	0.972222	pos	0.726528	8.062312e-31	3.8903206764557e-30	0.929577	0.985915	pos	0.588295	6.851977e-08	2.11519370820959e-05
Dokdonia	unclassified..derived.from.Bacteroidetes.	0.988889	0.972222	pos	0.855498	9.223217e-53	1.55570368159292e-51	0.985915	0.985915	pos	0.7167	0	0
Dyadobacter	unclassified..derived.from.Bacteroidetes.	0.955556	0.972222	pos	0.657803	1.106339e-23	2.10237500897308e-23	0.943662	0.985915	pos	0.487382	1.628195e-05	0.00169559
Kordia	unclassified..derived.from.Bacteroidetes.	0.966667	0.972222	pos	0.827583	1.65926e-46	2.24294295035461e-45	0.971831	0.985915	pos	0.718836	1.672925e-12	1.77251800282258e-09
Leadbetterella	unclassified..derived.from.Bacteroidetes.	0.894444	0.972222	pos	0.676645	1.904132e-25	4.63509015581098e-25	0.816901	0.985915	pos	0.481115	2.165513e-05	0.00210935
Leeuwenhoekiella	unclassified..derived.from.Bacteroidetes.	0.972222	0.972222	pos	0.819594	6.389907e-45	7.96023708627451e-44	0.971831	0.985915	pos	0.696049	1.60093e-11	1.32451753942065e-08
Maribacter	unclassified..derived.from.Bacteroidetes.	0.955556	0.972222	pos	0.838215	9.518758e-49	1.40641494170543e-47	0.971831	0.985915	pos	0.706042	6.104324e-12	5.41890740383784e-09
Marivirga	unclassified..derived.from.Bacteroidetes.	0.938889	0.972222	pos	0.763192	1.360617e-35	1.00516899302326e-34	0.901408	0.985915	pos	0.545427	8.715029e-07	0.000163946
Mucilaginibacter	unclassified..derived.from.Bacteroidetes.	0.916667	0.972222	pos	0.664861	2.500736e-24	5.22631887719298e-24	0.887324	0.985915	pos	0.486694	1.680384e-05	0.00173618
Paludibacter	unclassified..derived.from.Bacteroidetes.	0.805556	0.972222	pos	0.687538	1.580283e-26	4.36524550434783e-26	0.704225	0.985915	pos	0.505904	6.77782e-06	0.000869273
Polaribacter	unclassified..derived.from.Bacteroidetes.	0.994444	0.972222	pos	0.830614	3.951537e-47	5.53796288382353e-46	0.985915	0.985915	pos	0.738732	0	0
Psychroflexus	unclassified..derived.from.Bacteroidetes.	0.966667	0.972222	pos	0.878042	7.319503e-59	1.468523444e-57	0.971831	0.985915	pos	0.676984	9.075558e-11	5.60321880242481e-08
Riemerella	unclassified..derived.from.Bacteroidetes.	0.877778	0.972222	pos	0.655119	1.927624e-23	3.54638160617761e-23	0.830986	0.985915	pos	0.569896	2.133335e-07	5.4075756625e-05
Robiginitalea	unclassified..derived.from.Bacteroidetes.	0.983333	0.972222	pos	0.817661	1.50424e-44	1.83787271794872e-43	0.985915	0.985915	pos	0.723474	0	0
Spirosoma	unclassified..derived.from.Bacteroidetes.	0.95	0.972222	pos	0.651314	4.194034e-23	7.35402833854646e-23	0.943662	0.985915	pos	0.421212	0.000254235	0.0133216
Weeksella	unclassified..derived.from.Bacteroidetes.	0.861111	0.972222	pos	0.675543	2.434837e-25	5.80825947684606e-25	0.816901	0.985915	pos	0.554949	5.107551e-07	0.000109148
Zunongwangia	unclassified..derived.from.Bacteroidetes.	0.977778	0.972222	pos	0.84426	4.269721e-50	6.5104705808e-49	0.957746	0.985915	pos	0.56189	3.423366e-07	7.76534309067679e-05
Nitrosopumilus	unclassified..derived.from.Crenarchaeota.	0.861111	0.527778	pos	0.601649	4.195489e-19	4.26485441813333e-19	0.816901	0.422535	pos	0.533903	1.628256e-06	0.000274623
Acinetobacter	unclassified..derived.from.Deltaproteobacteria.	0.983333	0.961111	pos	0.681252	6.733196e-26	1.72261363436242e-25	1	1	neg	0.0879276	0.465037	0.826678
Bacillus	unclassified..derived.from.Deltaproteobacteria.	1	0.961111	pos	0.71417	2.210042e-29	9.11761916017316e-29	1	1	pos	0.385379	0.000981907	0.0338907
Bacteroides	unclassified..derived.from.Deltaproteobacteria.	1	0.961111	pos	0.710759	5.345864e-29	2.10521007933884e-28	1	1	pos	0.124681	0.299478	0.721918
Burkholderia	unclassified..derived.from.Deltaproteobacteria.	1	0.961111	pos	0.719533	5.369131e-30	2.37989853162791e-29	1	1	pos	0.441147	0.000137724	0.00850622
Chlorobium	unclassified..derived.from.Deltaproteobacteria.	0.972222	0.961111	pos	0.710408	5.850391e-29	2.2897012825462e-28	1	1	pos	0.523541	3.982134e-06	0.000571408
Clostridium	unclassified..derived.from.Deltaproteobacteria.	0.994444	0.961111	pos	0.671972	5.36191e-25	1.20516514858491e-24	0.985915	1	pos	0.398457	0.000637202	0.025378
Corynebacterium	unclassified..derived.from.Deltaproteobacteria.	0.961111	0.961111	pos	0.632134	1.792231e-21	2.53224038991846e-21	1	1	pos	0.219416	0.0661267	0.415456
Erythrobacter	unclassified..derived.from.Deltaproteobacteria.	0.972222	0.961111	pos	0.626723	4.932789e-21	6.56556971648045e-21	0.985915	1	pos	0.219618	0.0658738	0.414669
Escherichia	unclassified..derived.from.Deltaproteobacteria.	0.972222	0.961111	pos	0.620996	1.409773e-20	1.75967736607728e-20	1	1	neg	0.0141516	0.906622	0.970009
Frankia	unclassified..derived.from.Deltaproteobacteria.	0.977778	0.961111	pos	0.688589	1.235533e-26	3.44791493118594e-26	0.971831	1	pos	0.451932	7.612563e-05	0.00544172
Geobacillus	unclassified..derived.from.Deltaproteobacteria.	0.95	0.961111	pos	0.695284	2.515788e-27	7.74651361550889e-27	0.971831	1	pos	0.439692	0.000124796	0.00788871
Geobacter	unclassified..derived.from.Deltaproteobacteria.	0.977778	0.961111	pos	0.628264	3.704635e-21	5.01137992193045e-21	0.985915	1	pos	0.4722	3.989615e-05	0.00335057
Marinobacter	unclassified..derived.from.Deltaproteobacteria.	0.983333	0.961111	pos	0.624845	6.976927e-21	9.06203545231608e-21	0.985915	1	pos	0.0793427	0.50986	0.848706
Mycobacterium	unclassified..derived.from.Deltaproteobacteria.	0.988889	0.961111	pos	0.634872	1.065712e-21	1.55175482964095e-21	0.985915	1	pos	0.387592	0.000913682	0.0323296
Nitrosococcus	unclassified..derived.from.Deltaproteobacteria.	0.966667	0.961111	pos	0.612671	6.246797e-20	7.09136097796307e-20	1	1	pos	0.459222	6.786563e-05	0.00497674
Photobacterium	unclassified..derived.from.Deltaproteobacteria.	0.977778	0.961111	pos	0.642586	2.393887e-22	3.86019341962775e-22	0.985915	1	pos	0.00697518	0.953952	0.985916
Prevotella	unclassified..derived.from.Deltaproteobacteria.	0.983333	0.961111	pos	0.653693	2.583107e-23	4.64471881320755e-23	1	1	neg	0.0309859	0.797148	0.953442
Pseudoalteromonas	unclassified..derived.from.Deltaproteobacteria.	0.988889	0.961111	pos	0.615984	3.47304e-20	4.11156163975155e-20	0.985915	1	neg	0.0926895	0.441136	0.811945
Pseudomonas	unclassified..derived.from.Deltaproteobacteria.	1	0.961111	pos	0.71479	1.879955e-29	7.85788208333333e-29	1	1	pos	0.196915	0.099747	0.495424
Ralstonia	unclassified..derived.from.Deltaproteobacteria.	0.972222	0.961111	pos	0.628984	3.239223e-21	4.41312297212294e-21	0.985915	1	pos	0.263883	0.0264553	0.259751
Rhizobium	unclassified..derived.from.Deltaproteobacteria.	0.988889	0.961111	pos	0.619648	1.799362e-20	2.2097834871134e-20	0.985915	1	pos	0.074279	0.537304	0.860922
Roseobacter	unclassified..derived.from.Deltaproteobacteria.	1	0.961111	pos	0.687506	1.591956e-26	4.39112610130246e-26	1	1	neg	0.259423	0.0291891	0.274071
Shewanella	unclassified..derived.from.Deltaproteobacteria.	1	0.961111	pos	0.643565	1.974463e-22	3.224787041988e-22	1	1	neg	0.0219651	0.855464	0.964642
Streptomyces	unclassified..derived.from.Deltaproteobacteria.	0.977778	0.961111	pos	0.682365	5.2225e-26	1.35062211668928e-25	0.971831	1	pos	0.469337	3.646688e-05	0.00313307
Vibrio	unclassified..derived.from.Deltaproteobacteria.	1	0.961111	pos	0.624938	6.858055e-21	8.92858799863388e-21	1	1	neg	0.172502	0.150019	0.573561
unclassified..derived.from.Alphaproteobacteria.	unclassified..derived.from.Deltaproteobacteria.	0.994444	0.961111	pos	0.613055	5.837842e-20	6.69087603848467e-20	0.985915	1	neg	0.0192488	0.873192	0.967795
unclassified..derived.from.Archaea.	unclassified..derived.from.Euryarchaeota.	0.944444	0.9	pos	0.861093	3.564293e-54	6.40900231886793e-53	0.943662	0.873239	pos	0.897709	2.914987e-26	5.37888794991573e-23
Capnocytophaga	unclassified..derived.from.Flavobacteria.	0.972222	0.938889	pos	0.688703	1.202998e-26	3.36698118649046e-26	0.985915	0.901408	pos	0.652721	6.91219e-10	3.71578292381342e-07
Polaribacter	unclassified..derived.from.Flavobacteria.	0.994444	0.938889	pos	0.63612	8.392499e-22	1.23904748985283e-21	0.985915	0.901408	pos	0.661075	3.508596e-10	1.99379913352941e-07
Algoriphagus	unclassified..derived.from.Flavobacteriaceae.	0.955556	0.877778	pos	0.674236	3.254805e-25	7.5746743956044e-25	0.971831	0.830986	pos	0.440271	0.000121963	0.0077529
Blattabacterium	unclassified..derived.from.Flavobacteriaceae.	0.761111	0.877778	pos	0.609657	1.059342e-19	1.1630794078341e-19	0.605634	0.830986	pos	0.38069	0.00105638	0.0355944
Candidatus.Sulcia	unclassified..derived.from.Flavobacteriaceae.	0.655556	0.877778	pos	0.647218	9.565543e-23	1.62350177720392e-22	0.394366	0.830986	pos	0.287538	0.0150398	0.189704
Chitinophaga	unclassified..derived.from.Flavobacteriaceae.	0.972222	0.877778	pos	0.624173	7.894703e-21	1.0144627203504e-20	0.943662	0.830986	pos	0.407997	0.00041268	0.0188346
Chryseobacterium	unclassified..derived.from.Flavobacteriaceae.	0.894444	0.877778	pos	0.653234	2.837104e-23	5.06796647047798e-23	0.830986	0.830986	pos	0.511482	5.152817e-06	0.000704608
Croceibacter	unclassified..derived.from.Flavobacteriaceae.	0.972222	0.877778	pos	0.731352	2.106484e-31	1.07904638605898e-30	0.971831	0.830986	pos	0.479954	2.281612e-05	0.00219767
Cytophaga	unclassified..derived.from.Flavobacteriaceae.	0.944444	0.877778	pos	0.675616	2.39573e-25	5.72213205513784e-25	0.929577	0.830986	pos	0.383816	0.000952432	0.0332208
Dokdonia	unclassified..derived.from.Flavobacteriaceae.	0.988889	0.877778	pos	0.708503	9.519429e-29	3.57165977834646e-28	0.985915	0.830986	pos	0.503943	7.454871e-06	0.000935648
Dyadobacter	unclassified..derived.from.Flavobacteriaceae.	0.955556	0.877778	pos	0.649919	5.561806e-23	9.6021759384058e-23	0.943662	0.830986	pos	0.439539	0.000125552	0.00793194
Kordia	unclassified..derived.from.Flavobacteriaceae.	0.966667	0.877778	pos	0.763203	1.355879e-35	1.00516899302326e-34	0.971831	0.830986	pos	0.581885	1.025916e-07	2.89739673069647e-05
Leeuwenhoekiella	unclassified..derived.from.Flavobacteriaceae.	0.972222	0.877778	pos	0.702162	4.683623e-28	1.5941045425e-27	0.971831	0.830986	pos	0.506628	6.542627e-06	0.00084872
Maribacter	unclassified..derived.from.Flavobacteriaceae.	0.955556	0.877778	pos	0.741298	1.205231e-32	7.09003174691358e-32	0.971831	0.830986	pos	0.616408	1.047394e-08	4.16996116690909e-06
Marivirga	unclassified..derived.from.Flavobacteriaceae.	0.938889	0.877778	pos	0.702681	4.11732e-28	1.41398412972973e-27	0.901408	0.830986	pos	0.445073	0.000100653	0.0067195
Paludibacter	unclassified..derived.from.Flavobacteriaceae.	0.805556	0.877778	pos	0.713	2.996697e-29	1.21010688177966e-28	0.704225	0.830986	pos	0.504022	7.426432e-06	0.00093422
Polaribacter	unclassified..derived.from.Flavobacteriaceae.	0.994444	0.877778	pos	0.654157	2.348933e-23	4.25981569743102e-23	0.985915	0.830986	pos	0.593376	4.944507e-08	1.60637788989614e-05
Psychroflexus	unclassified..derived.from.Flavobacteriaceae.	0.966667	0.877778	pos	0.748682	1.321686e-33	8.36921433887043e-33	0.971831	0.830986	pos	0.527259	2.310596e-06	0.000370389
Riemerella	unclassified..derived.from.Flavobacteriaceae.	0.877778	0.877778	pos	0.640977	3.279935e-22	5.13781641906327e-22	0.830986	0.830986	pos	0.494238	1.18409e-05	0.00132602
Robiginitalea	unclassified..derived.from.Flavobacteriaceae.	0.983333	0.877778	pos	0.805886	2.244603e-42	2.56180438203593e-41	0.985915	0.830986	pos	0.537995	1.307647e-06	0.00023042
Zunongwangia	unclassified..derived.from.Flavobacteriaceae.	0.977778	0.877778	pos	0.674276	3.226291e-25	7.51749467726161e-25	0.957746	0.830986	pos	0.492362	1.29278e-05	0.00141871
unclassified..derived.from.Bacteroidetes.	unclassified..derived.from.Flavobacteriaceae.	0.972222	0.877778	pos	0.711957	3.925692e-29	1.56534915313808e-28	0.985915	0.830986	pos	0.571762	1.90726e-07	4.90947557445141e-05
Blattabacterium	unclassified..derived.from.Flavobacteriales.	0.761111	1	pos	0.654938	2.000797e-23	3.6703744773821e-23	0.605634	1	pos	0.520852	3.215744e-06	0.000483621
Capnocytophaga	unclassified..derived.from.Flavobacteriales.	0.972222	1	pos	0.660984	5.688474e-24	1.12931709843913e-23	0.985915	1	pos	0.759624	0	0
Chryseobacterium	unclassified..derived.from.Flavobacteriales.	0.894444	1	pos	0.612881	6.02042e-20	6.87120989221557e-20	0.830986	1	pos	0.550534	6.557126e-07	0.000130371
Croceibacter	unclassified..derived.from.Flavobacteriales.	0.972222	1	pos	0.765774	5.821551e-36	4.45617518313253e-35	0.971831	1	pos	0.755791	2.571272e-14	3.32498875889764e-11
Dokdonia	unclassified..derived.from.Flavobacteriales.	0.988889	1	pos	0.79545	1.434567e-40	1.45440675638298e-39	0.985915	1	pos	0.692354	0	0
Kordia	unclassified..derived.from.Flavobacteriales.	0.966667	1	pos	0.768339	2.478293e-36	1.95191175950413e-35	0.971831	1	pos	0.734195	3.209e-13	3.65976421875e-10
Leeuwenhoekiella	unclassified..derived.from.Flavobacteriales.	0.972222	1	pos	0.761791	2.146984e-35	1.5678741394636e-34	0.971831	1	pos	0.55195	6.0546e-07	0.000121631
Maribacter	unclassified..derived.from.Flavobacteriales.	0.955556	1	pos	0.731343	2.11167e-31	1.07904638605898e-30	0.971831	1	pos	0.715499	2.360718e-12	2.44602407157729e-09
Marivirga	unclassified..derived.from.Flavobacteriales.	0.938889	1	pos	0.710732	5.38285e-29	2.11540455670103e-28	0.901408	1	pos	0.697041	1.457339e-11	1.21489919097716e-08
Paludibacter	unclassified..derived.from.Flavobacteriales.	0.805556	1	pos	0.626927	4.749624e-21	6.33061772307692e-21	0.704225	1	pos	0.50203	8.175704e-06	0.00100423
Polaribacter	unclassified..derived.from.Flavobacteriales.	0.994444	1	pos	0.872401	0	0	0.985915	1	pos	0.777498	0	0
Psychroflexus	unclassified..derived.from.Flavobacteriales.	0.966667	1	pos	0.750118	8.522145e-34	5.48757039527027e-33	0.971831	1	pos	0.637296	2.290958e-09	1.10011200276316e-06
Robiginitalea	unclassified..derived.from.Flavobacteriales.	0.983333	1	pos	0.754772	2.013305e-34	1.375397609319e-33	0.985915	1	pos	0.717036	0	0
Zunongwangia	unclassified..derived.from.Flavobacteriales.	0.977778	1	pos	0.785456	6.1674e-39	5.76228647058823e-38	0.957746	1	pos	0.654482	6.002065e-10	3.26933376380597e-07
unclassified..derived.from.Bacteroidetes.	unclassified..derived.from.Flavobacteriales.	0.972222	1	pos	0.822805	1.505382e-45	1.9386879e-44	0.985915	1	pos	0.744366	0	0
unclassified..derived.from.Flavobacteria.	unclassified..derived.from.Flavobacteriales.	0.938889	1	pos	0.612319	6.646657e-20	7.51841438694362e-20	0.901408	1	pos	0.573777	1.688541e-07	4.41568259677548e-05
unclassified..derived.from.Flavobacteriaceae.	unclassified..derived.from.Flavobacteriales.	0.877778	1	pos	0.632471	1.681486e-21	2.38460737797619e-21	0.830986	1	pos	0.505422	6.938616e-06	0.000885745
Acinetobacter	unclassified..derived.from.Gammaproteobacteria.	0.983333	1	pos	0.720102	4.611386e-30	2.068070992e-29	1	1	pos	0.0971831	0.419231	0.799999
Actinobacillus	unclassified..derived.from.Gammaproteobacteria.	0.933333	1	pos	0.6632	3.561198e-24	7.28287917167382e-24	0.971831	1	pos	0.0811543	0.50108	0.843276
Bacillus	unclassified..derived.from.Gammaproteobacteria.	1	1	pos	0.711084	0	0	1	1	pos	0.0622401	0.605346	0.89272
Bacteroides	unclassified..derived.from.Gammaproteobacteria.	1	1	pos	0.776451	1.544519e-37	1.32011354887892e-36	1	1	pos	0.261972	0.0275991	0.265857
Burkholderia	unclassified..derived.from.Gammaproteobacteria.	1	1	pos	0.77059	0	0	1	1	pos	0.268075	0.0240873	0.246928
Clostridium	unclassified..derived.from.Gammaproteobacteria.	0.994444	1	pos	0.688495	0	0	0.985915	1	pos	0.18994	0.112527	0.518
Corynebacterium	unclassified..derived.from.Gammaproteobacteria.	0.961111	1	pos	0.612014	7.012614e-20	7.89955217730496e-20	1	1	pos	0.383266	0.00105132	0.035489
Erythrobacter	unclassified..derived.from.Gammaproteobacteria.	0.972222	1	pos	0.608943	1.19962e-19	1.30655755428571e-19	0.985915	1	neg	0.142186	0.236295	0.667692
Haemophilus	unclassified..derived.from.Gammaproteobacteria.	0.961111	1	pos	0.649117	6.537e-23	1.12046061151079e-22	0.985915	1	pos	0.217673	0.068351	0.422227
Marinobacter	unclassified..derived.from.Gammaproteobacteria.	0.983333	1	pos	0.721962	2.797558e-30	1.28795786183575e-29	0.985915	1	neg	0.0320926	0.790064	0.951795
Methylobacterium	unclassified..derived.from.Gammaproteobacteria.	1	1	pos	0.608994	0	0	1	1	pos	0.120791	0.314899	0.732383
Nitrosococcus	unclassified..derived.from.Gammaproteobacteria.	0.966667	1	pos	0.627662	4.143525e-21	5.57343588567396e-21	1	1	pos	0.298558	0.0116988	0.163581
Photobacterium	unclassified..derived.from.Gammaproteobacteria.	0.977778	1	pos	0.633124	1.486108e-21	2.13131817005267e-21	0.985915	1	neg	0.158954	0.185087	0.6165
Prevotella	unclassified..derived.from.Gammaproteobacteria.	0.983333	1	pos	0.707653	1.181627e-28	4.36469198062016e-28	1	1	pos	0.282126	0.0174212	0.206422
Pseudoalteromonas	unclassified..derived.from.Gammaproteobacteria.	0.988889	1	pos	0.757374	8.859955e-35	6.23139270479705e-34	0.985915	1	neg	0.266801	0.0247873	0.251002
Pseudomonas	unclassified..derived.from.Gammaproteobacteria.	1	1	pos	0.741745	0	0	1	1	pos	0.16613	0.165834	0.59258
Psychrobacter	unclassified..derived.from.Gammaproteobacteria.	0.966667	1	pos	0.616848	2.976154e-20	3.5475606779237e-20	0.971831	1	pos	0.076057	0.528429	0.855968
Psychromonas	unclassified..derived.from.Gammaproteobacteria.	0.944444	1	pos	0.627794	4.043439e-21	5.44265164830508e-21	0.957746	1	neg	0.192428	0.107899	0.508676
Rickettsia	unclassified..derived.from.Gammaproteobacteria.	0.988889	1	pos	0.64344	2.023774e-22	3.29684892649573e-22	1	1	pos	0.127767	0.287606	0.709771
Roseobacter	unclassified..derived.from.Gammaproteobacteria.	1	1	pos	0.777191	0	0	1	1	pos	0.49886	1.257014e-05	0.00138548
Roseovarius	unclassified..derived.from.Gammaproteobacteria.	0.994444	1	pos	0.647316	0	0	0.985915	1	pos	0.322703	0.00626675	0.112205
Ruegeria	unclassified..derived.from.Gammaproteobacteria.	1	1	pos	0.804796	0	0	1	1	pos	0.375922	0.00132869	0.0414802
Shewanella	unclassified..derived.from.Gammaproteobacteria.	1	1	pos	0.825373	0	0	1	1	neg	0.221328	0.0637562	0.408247
Streptomyces	unclassified..derived.from.Gammaproteobacteria.	0.977778	1	pos	0.626496	5.144624e-21	6.82844940389972e-21	0.971831	1	pos	0.304815	0.00974782	0.147169
Vibrio	unclassified..derived.from.Gammaproteobacteria.	1	1	pos	0.773892	0	0	1	1	neg	0.186284	0.119714	0.527332
Xanthomonas	unclassified..derived.from.Gammaproteobacteria.	0.983333	1	pos	0.606203	1.927062e-19	2.04652582284123e-19	0.985915	1	pos	0.139572	0.245694	0.674268
Yersinia	unclassified..derived.from.Gammaproteobacteria.	0.983333	1	pos	0.699774	8.440917e-28	2.77048483511188e-27	1	1	neg	0.0423877	0.725043	0.935316
unclassified..derived.from.Alphaproteobacteria.	unclassified..derived.from.Gammaproteobacteria.	0.994444	1	pos	0.739082	0	0	0.985915	1	pos	0.321965	0.00639195	0.113455
unclassified..derived.from.Deltaproteobacteria.	unclassified..derived.from.Gammaproteobacteria.	0.961111	1	pos	0.628484	3.555782e-21	4.81685891400142e-21	1	1	pos	0.138162	0.249926	0.679346
Sideroxydans	unclassified..derived.from.Methylophilales.	0.872222	0.8	pos	0.634916	1.056794e-21	1.5399459969419e-21	0.84507	0.704225	pos	0.387601	0.000839025	0.0305964
Synechococcus	unclassified..derived.from.Oceanospirillales.	1	0.933333	neg	0.612167	6.826864e-20	7.7085324549763e-20	1	0.929577	neg	0.516653	3.979295e-06	0.000571407
Chthoniobacter	unclassified..derived.from.Opitutaceae.	0.916667	0.822222	pos	0.688642	1.220275e-26	3.41032866568915e-26	0.929577	0.746479	pos	0.514477	4.438787e-06	0.000623585
Coraliomargarita	unclassified..derived.from.Opitutaceae.	0.927778	0.822222	pos	0.623669	8.65933e-21	1.10621199597855e-20	0.929577	0.746479	pos	0.216456	0.0698196	0.426884
Lentisphaera	unclassified..derived.from.Opitutaceae.	0.911111	0.822222	pos	0.6425	2.434663e-22	3.91600647932489e-22	0.887324	0.746479	pos	0.403675	0.000481455	0.0209037
Opitutus	unclassified..derived.from.Opitutaceae.	0.911111	0.822222	pos	0.643298	2.081064e-22	3.3843924778157e-22	0.915493	0.746479	pos	0.369892	0.00149909	0.0448478
Ahrensia	unclassified..derived.from.Proteobacteria.	0.933333	0.866667	pos	0.603364	3.134728e-19	3.22438832595791e-19	0.943662	0.84507	pos	0.387166	0.000851415	0.0308837
Candidatus.Puniceispirillum	unclassified..derived.from.Proteobacteria.	0.988889	0.866667	pos	0.613968	4.967875e-20	5.74561271237864e-20	0.971831	0.84507	pos	0.708188	4.936863e-12	4.43042988159836e-09
Croceibacter	unclassified..derived.from.Proteobacteria.	0.972222	0.866667	pos	0.639033	4.78738e-22	7.299797024e-22	0.971831	0.84507	pos	0.661757	3.31651e-10	1.89447702965217e-07
Kordia	unclassified..derived.from.Proteobacteria.	0.966667	0.866667	pos	0.600305	5.266009e-19	5.29099270110701e-19	0.971831	0.84507	pos	0.625472	5.49112e-09	2.37626590197628e-06
Loktanella	unclassified..derived.from.Proteobacteria.	0.933333	0.866667	pos	0.62711	4.591514e-21	6.13274399719692e-21	0.915493	0.84507	pos	0.476707	2.637773e-05	0.00246155
Maribacter	unclassified..derived.from.Proteobacteria.	0.955556	0.866667	pos	0.62961	2.880974e-21	3.95900248305696e-21	0.971831	0.84507	pos	0.552198	5.970378e-07	0.000120533
Robiginitalea	unclassified..derived.from.Proteobacteria.	0.983333	0.866667	pos	0.633876	1.288209e-21	1.86009572272727e-21	0.985915	0.84507	pos	0.632623	3.250684e-09	1.49766463588235e-06
Thalassobium	unclassified..derived.from.Proteobacteria.	0.972222	0.866667	pos	0.603838	2.890833e-19	2.98641067642276e-19	0.971831	0.84507	pos	0.435348	0.000148062	0.00897265
unclassified..derived.from.Bacteria.	unclassified..derived.from.Proteobacteria.	1	0.866667	pos	0.614223	4.7486e-20	5.50537201946472e-20	1	0.84507	pos	0.530074	1.993982e-06	0.000326487
Oceanicola	unclassified..derived.from.Rhodobacteraceae.	0.988889	0.988889	pos	0.654209	2.32373e-23	4.21812321904762e-23	1	0.985915	pos	0.490778	1.800624e-05	0.00183047
Roseovarius	unclassified..derived.from.Rhodobacteraceae.	0.994444	0.988889	pos	0.732875	1.370664e-31	7.11848932970027e-31	0.985915	0.985915	pos	0.691717	0	0
Ruegeria	unclassified..derived.from.Rhodobacteraceae.	1	0.988889	pos	0.704177	2.835442e-28	9.97112998523985e-28	1	0.985915	pos	0.67049	0	0
Abiotrophia	unclassified..derived.from.Rhodobacterales.	0.538889	0.994444	neg	0.600715	4.913417e-19	4.96288966719661e-19	0.225352	1	neg	0.0187938	0.876378	0.969126
Acinetobacter	unclassified..derived.from.Rhodobacterales.	0.983333	0.994444	pos	0.748634	1.34123e-33	8.43691214521452e-33	1	1	pos	0.0776995	0.518686	0.854064
Bacillus	unclassified..derived.from.Rhodobacterales.	1	0.994444	pos	0.724389	0	0	1	1	neg	0.22049	0.0647873	0.411233
Bacteroides	unclassified..derived.from.Rhodobacterales.	1	0.994444	pos	0.788037	2.380976e-39	2.28047249045226e-38	1	1	pos	0.373038	0.00145463	0.0439622
Bradyrhizobium	unclassified..derived.from.Rhodobacterales.	0.988889	0.994444	pos	0.636899	7.227822e-22	1.08133663516484e-21	1	1	pos	0.095104	0.429287	0.807784
Burkholderia	unclassified..derived.from.Rhodobacterales.	1	0.994444	pos	0.670595	0	0	1	1	neg	0.0210597	0.861365	0.964642
Clostridium	unclassified..derived.from.Rhodobacterales.	0.994444	0.994444	pos	0.633367	0	0	0.985915	1	neg	0.0641851	0.5941	0.887513
Corynebacterium	unclassified..derived.from.Rhodobacterales.	0.961111	0.994444	pos	0.657268	1.236556e-23	2.33585305847374e-23	1	1	pos	0.309121	0.00895501	0.139844
Frankia	unclassified..derived.from.Rhodobacterales.	0.977778	0.994444	pos	0.653822	2.515465e-23	4.53164110586011e-23	0.971831	1	neg	0.0129109	0.914898	0.973295
Marinobacter	unclassified..derived.from.Rhodobacterales.	0.983333	0.994444	pos	0.638651	5.155085e-22	7.84165363926576e-22	0.985915	1	neg	0.10939	0.362999	0.766056
Mycobacterium	unclassified..derived.from.Rhodobacterales.	0.988889	0.994444	pos	0.651064	4.41235e-23	7.70140943223443e-23	0.985915	1	pos	0.154158	0.198828	0.630499
Nitrosococcus	unclassified..derived.from.Rhodobacterales.	0.966667	0.994444	pos	0.636764	7.417777e-22	1.10801590611285e-21	1	1	pos	0.196546	0.100393	0.496815
Paracoccus	unclassified..derived.from.Rhodobacterales.	0.983333	0.994444	pos	0.636478	7.83648e-22	1.16598992037471e-21	1	1	pos	0.438866	0.000150198	0.00906026
Photobacterium	unclassified..derived.from.Rhodobacterales.	0.977778	0.994444	pos	0.648891	6.841318e-23	1.17051634721724e-22	0.985915	1	neg	0.372535	0.00147767	0.0444042
Prevotella	unclassified..derived.from.Rhodobacterales.	0.983333	0.994444	pos	0.776225	1.671409e-37	1.42218997946429e-36	1	1	pos	0.468913	4.572652e-05	0.00370476
Pseudoalteromonas	unclassified..derived.from.Rhodobacterales.	0.988889	0.994444	pos	0.604473	2.593781e-19	2.69267243246187e-19	0.985915	1	neg	0.440443	0.00014147	0.00869182
Pseudomonas	unclassified..derived.from.Rhodobacterales.	1	0.994444	pos	0.696466	0	0	1	1	neg	0.0300469	0.803172	0.953442
Rhizobium	unclassified..derived.from.Rhodobacterales.	0.988889	0.994444	pos	0.659307	8.086905e-24	1.5680204404883e-23	0.985915	1	pos	0.0970825	0.419714	0.800351
Rhodomicrobium	unclassified..derived.from.Rhodobacterales.	0.922222	0.994444	neg	0.603531	3.046424e-19	3.13864007783784e-19	0.929577	1	pos	0.0674157	0.576429	0.881442
Roseobacter	unclassified..derived.from.Rhodobacterales.	1	0.994444	pos	0.85843	0	0	1	1	pos	0.680382	0	0
Ruegeria	unclassified..derived.from.Rhodobacterales.	1	0.994444	pos	0.728911	0	0	1	1	pos	0.700302	0	0
Shewanella	unclassified..derived.from.Rhodobacterales.	1	0.994444	pos	0.674716	0	0	1	1	neg	0.412106	0.000398547	0.0183623
Streptomyces	unclassified..derived.from.Rhodobacterales.	0.977778	0.994444	pos	0.627204	4.512042e-21	6.03929217134831e-21	0.971831	1	pos	0.039001	0.746757	0.939867
Vibrio	unclassified..derived.from.Rhodobacterales.	1	0.994444	pos	0.659368	0	0	1	1	neg	0.330818	0.00502617	0.0978816
Xanthomonas	unclassified..derived.from.Rhodobacterales.	0.983333	0.994444	pos	0.619935	1.708442e-20	2.11036322229423e-20	0.985915	1	pos	0.05104	0.672505	0.916864
Yersinia	unclassified..derived.from.Rhodobacterales.	0.983333	0.994444	pos	0.666543	1.744155e-24	3.69784141268076e-24	1	1	neg	0.133836	0.265172	0.690932
Zymomonas	unclassified..derived.from.Rhodobacterales.	0.933333	0.994444	neg	0.65088	4.579354e-23	7.98558895150961e-23	0.915493	1	neg	0.135519	0.259808	0.690024
unclassified..derived.from.Alphaproteobacteria.	unclassified..derived.from.Rhodobacterales.	0.994444	0.994444	pos	0.675794	0	0	0.985915	1	pos	0.168243	0.160459	0.584873
unclassified..derived.from.Deltaproteobacteria.	unclassified..derived.from.Rhodobacterales.	0.961111	0.994444	pos	0.684247	3.390704e-26	8.92635611049724e-26	1	1	neg	0.130047	0.279034	0.705858
unclassified..derived.from.Gammaproteobacteria.	unclassified..derived.from.Rhodobacterales.	1	0.994444	pos	0.718294	0	0	1	1	pos	0.579645	2.133692e-07	5.4075756625e-05
Agrobacterium	unclassified..derived.from.Rickettsiales.	0.994444	0.95	pos	0.615287	3.93132e-20	4.61681818853974e-20	0.985915	0.915493	pos	0.458669	5.752417e-05	0.00438684
Bacillus	unclassified..derived.from.Rickettsiales.	1	0.95	pos	0.603264	3.188659e-19	3.27809280151025e-19	1	0.915493	neg	0.231356	0.0522267	0.369685
Burkholderia	unclassified..derived.from.Rickettsiales.	1	0.95	pos	0.612088	6.922402e-20	7.81178106098283e-20	1	0.915493	neg	0.300709	0.0108307	0.156574
Campylobacter	unclassified..derived.from.Rickettsiales.	0.966667	0.95	pos	0.614588	4.45142e-20	5.18606755501222e-20	0.957746	0.915493	pos	0.358283	0.0021557	0.0567393
Clostridium	unclassified..derived.from.Rickettsiales.	0.994444	0.95	pos	0.707695	1.169033e-28	4.32655708349515e-28	0.985915	0.915493	pos	0.132769	0.269695	0.696038
Geobacter	unclassified..derived.from.Rickettsiales.	0.977778	0.95	pos	0.602364	3.715882e-19	3.79960895493562e-19	0.985915	0.915493	neg	0.0399849	0.740591	0.938321
Rickettsia	unclassified..derived.from.Rickettsiales.	0.988889	0.95	pos	0.643927	1.838401e-22	3.0128910627687e-22	1	0.915493	pos	0.62998	3.951903e-09	1.76122428746947e-06
unclassified..derived.from.Alphaproteobacteria.	unclassified..derived.from.Rickettsiales.	0.994444	0.95	pos	0.684446	3.238285e-26	8.58438276773296e-26	0.985915	0.915493	pos	0.0889932	0.460498	0.825023
Cenarchaeum	unclassified..derived.from.Thaumarchaeota.	0.744444	0.833333	pos	0.799881	2.530208e-41	2.67920913777778e-40	0.619718	0.746479	pos	0.749992	5.192683e-14	6.4850292576616e-11
Nitrosopumilus	unclassified..derived.from.Thaumarchaeota.	0.861111	0.833333	pos	0.827883	1.44146e-46	1.96244482857143e-45	0.816901	0.746479	pos	0.743225	1.151492e-13	1.35560324322581e-10
unclassified..derived.from.Crenarchaeota.	unclassified..derived.from.Thaumarchaeota.	0.527778	0.833333	pos	0.630882	2.269251e-21	3.17561850660793e-21	0.422535	0.746479	pos	0.664161	2.716361e-10	1.56526728465789e-07
Blastopirellula	unclassified..derived.from.Verrucomicrobia.subdivision.3.	0.938889	0.65	pos	0.745739	3.218603e-33	1.95995441469649e-32	0.915493	0.887324	pos	0.716577	2.11331e-12	2.21765890111821e-09
Chthoniobacter	unclassified..derived.from.Verrucomicrobia.subdivision.3.	0.916667	0.65	pos	0.789994	1.146684e-39	1.11509168571429e-38	0.929577	0.887324	pos	0.748842	5.955814e-14	7.29931674391791e-11
Haliangium	unclassified..derived.from.Verrucomicrobia.subdivision.3.	0.938889	0.65	pos	0.600307	5.264108e-19	5.29099270110701e-19	0.957746	0.887324	pos	0.536211	1.439386e-06	0.000248045
Isosphaera	unclassified..derived.from.Verrucomicrobia.subdivision.3.	0.866667	0.65	pos	0.659377	7.968571e-24	1.54822592517839e-23	0.802817	0.887324	pos	0.567077	2.523427e-07	6.03225775316594e-05
Lentisphaera	unclassified..derived.from.Verrucomicrobia.subdivision.3.	0.911111	0.65	pos	0.662412	4.208493e-24	8.5062435397667e-24	0.887324	0.887324	pos	0.537301	1.357477e-06	0.000237544
Pirellula	unclassified..derived.from.Verrucomicrobia.subdivision.3.	0.911111	0.65	pos	0.686977	1.801063e-26	4.95357298412698e-26	0.859155	0.887324	pos	0.638842	2.037787e-09	9.9305835175816e-07
Planctomyces	unclassified..derived.from.Verrucomicrobia.subdivision.3.	0.977778	0.65	pos	0.65537	1.830404e-23	3.39042762293489e-23	0.985915	0.887324	pos	0.80741	1.815388e-17	2.71033302518182e-14
Stigmatella	unclassified..derived.from.Verrucomicrobia.subdivision.3.	0.883333	0.65	pos	0.618233	2.321891e-20	2.81521898600509e-20	0.84507	0.887324	pos	0.398921	0.000569072	0.0234112
unclassified..derived.from.Opitutaceae.	unclassified..derived.from.Verrucomicrobia.subdivision.3.	0.822222	0.65	pos	0.640976	3.280547e-22	5.13781641906327e-22	0.746479	0.887324	pos	0.480826	2.193904e-05	0.00213069
Anaeromyxobacter	unclassified..derived.from.Verrucomicrobiales.	0.95	0.933333	pos	0.617054	2.868515e-20	3.42783046394984e-20	0.957746	0.957746	pos	0.523912	2.748519e-06	0.000427648
Bacteroides	unclassified..derived.from.Verrucomicrobiales.	1	0.933333	pos	0.61479	4.294728e-20	5.00963988249694e-20	1	0.957746	neg	0.0247158	0.83789	0.9619
Geobacillus	unclassified..derived.from.Verrucomicrobiales.	0.95	0.933333	pos	0.605455	2.191818e-19	2.30552158278146e-19	0.971831	0.957746	pos	0.2924	0.0133457	0.17678
Geobacter	unclassified..derived.from.Verrucomicrobiales.	0.977778	0.933333	pos	0.640098	3.89277e-22	6.02753161525974e-22	0.985915	0.957746	pos	0.311211	0.00824876	0.132772
Lactobacillus	unclassified..derived.from.Verrucomicrobiales.	0.944444	0.933333	pos	0.622582	1.056247e-20	1.33679069189907e-20	0.943662	0.957746	pos	0.180135	0.13278	0.547834
Staphylococcus	unclassified..derived.from.Verrucomicrobiales.	0.944444	0.933333	pos	0.613028	5.865378e-20	6.71436064144144e-20	0.943662	0.957746	pos	0.155065	0.196622	0.62736
Streptomyces	unclassified..derived.from.Verrucomicrobiales.	0.977778	0.933333	pos	0.677477	1.580401e-25	3.8767622985843e-25	0.971831	0.957746	pos	0.283882	0.0164329	0.199778
unclassified..derived.from.Deltaproteobacteria.	unclassified..derived.from.Verrucomicrobiales.	0.961111	0.933333	pos	0.641335	3.058412e-22	4.83762097261411e-22	1	0.957746	pos	0.262383	0.027069	0.26303
Colwellia	unclassified..derived.from.Vibrionaceae.	0.95	0.916667	pos	0.655196	1.897308e-23	3.5041366744186e-23	0.971831	0.929577	pos	0.687529	3.533291e-11	2.28001393989195e-08
Ferrimonas	unclassified..derived.from.Vibrionaceae.	0.933333	0.916667	pos	0.612529	6.404716e-20	7.26198018798334e-20	0.943662	0.929577	pos	0.643623	1.412913e-09	7.13966676023077e-07
